26 **Abstract**

27

28 Palladin (PALLD) belongs to the PALLD/myopalladin (MYPN)/myotilin family of actin-associated  
29 immunoglobulin-containing proteins in the sarcomeric Z-line. PALLD is ubiquitously expressed in  
30 several isoforms and its longest 200 kDa isoform, predominantly expressed in striated muscle,  
31 shows high structural homology to MYPN. *MYPN* gene mutations are associated with human  
32 cardiomyopathies, whereas the role of PALLD in the heart has remained unknown, partly due to  
33 embryonic lethality of PALLD knockout mice. In a yeast two-hybrid screening, *CARP/Ankrd1* and  
34 *FHOD1* were identified as novel interaction partners of PALLD's N-terminal region. To study the  
35 role of PALLD in the heart, we generated conditional (cPKO) and inducible (cPKOi)  
36 cardiomyocyte-specific PALLD knockout mice. While cPKO mice exhibited no pathological  
37 phenotype, ablation of PALLD in adult cPKOi mice caused progressive cardiac dilation and  
38 systolic dysfunction, associated with reduced cardiomyocyte contractility, intercalated disc  
39 abnormalities, and fibrosis, demonstrating that PALLD is essential for normal cardiac function.  
40 Double cPKO and MYPN knockout mice exhibited a similar phenotype as MKO mice, suggesting  
41 that MYPN does not compensate for the loss of PALLD in cPKO mice. Transcript levels of *MYPN*  
42 and the *PALLD* long isoform were significantly increased in myocardial tissue from human dilated  
43 cardiomyopathy patients, suggesting a role of PALLD in cardiac disease.

## 44 **Introduction**

45

46 Palladin (PALLD) is an actin-associated protein, which together with myopalladin (MYPN) and  
47 myotilin (MYOT) belongs to a small protein family of immunoglobulin (Ig) domain-containing  
48 proteins in the Z-line associated with the actin cytoskeleton (reviewed in (Otey, Dixon, Stack, &  
49 Goicoechea, 2009)). While MYPN and MYOT are specifically expressed in striated and skeletal  
50 muscle, respectively, PALLD is ubiquitously expressed in various tissues, including the heart,  
51 where it is expressed at high levels (Wang & Moser, 2008). Mutations in the *MYPN* gene have been  
52 associated with dilated (DCM), hypertrophic (HCM), and restrictive cardiomyopathy (Bagnall,  
53 Yeates, & Semsarian, 2010; Duboscq-Bidot et al., 2008; Meyer et al., 2013; Purevjav et al., 2012),  
54 while *MYOT* gene mutations can cause various skeletal muscle disorders (reviewed in (Otey et al.,  
55 2009)). Mutations in the *PALLD* gene have been linked to pancreatic cancer (Liotta et al., 2021;  
56 Pogue-Geile et al., 2006; Slater et al., 2007) and PALLD levels have been shown to correlate with  
57 increased invasiveness of cancer cells (Gilam et al., 2016; Goicoechea et al., 2009; von Nandelstadh  
58 et al., 2014). However, the role of PALLD in the heart has remained unknown. Whereas MYPN and  
59 MYOT are expressed as single isoforms, PALLD exists in at least 9 different isoforms due to the  
60 presence of four alternative promoters, alternative splicing, and early termination (Goicoechea et  
61 al., 2010; Wang & Moser, 2008). The longest 200 kDa isoform of PALLD, is predominantly  
62 expressed in striated muscle and highly homologous in structure to MYPN, sharing five Ig domains  
63 and a central proline-rich region (Otey et al., 2009). Furthermore, PALLD contains an additional  
64 proline-rich region, not shared with MYPN. The 140 kDa and 90-92 kDa isoforms containing four  
65 and three Ig domains, respectively, are also expressed in the heart, but have a more ubiquitous  
66 expression pattern (Wang & Moser, 2008). The expression profiles of the other isoforms have not  
67 been determined in detail (Goicoechea et al., 2010; Wang & Moser, 2008). Within the cardiac Z-  
68 line, PALLD and MYPN share several interaction partners, including  $\alpha$ -actinin (Bang et al., 2001;  
69 Ronty, Taivainen, Moza, Otey, & Carpen, 2004), nebullette (Bang et al., 2001), titin (Filomena et

70 al., 2021), and members of the PDZ-LIM protein family (cypher/ZASP/LDB3, ALP/PDLIM3,  
71 CLP36/PDLIM1, RIL/PDLIM4) (von Nandelstadh et al., 2009) (illustrated in *Figure 1A*).  
72 Furthermore, PALLD and MYPN bind to myocardin related transcription factors (MRTFs)  
73 (Filomena et al., 2020; Jin et al., 2010) as well as bind and bundle F-actin (Dixon et al., 2008;  
74 Filomena et al., 2020; Gurung et al., 2016), stabilizing the actin cytoskeleton and consequently  
75 promoting serum response factor (SRF) signaling. Additionally, PALLD binds to sorbin and SH3  
76 domain-containing 2 (SORBS2) (Ronty et al., 2005), localized at the intercalated disc (ICD) and Z-  
77 line of the heart, as well as various proteins expressed in non-muscle cells, including actin-  
78 associated (VASP (Boukhelifa, Parast, Bear, Gertler, & Otey, 2004), ezrin (Mykkanen et al., 2001),  
79 profilin 1 (Boukhelifa et al., 2006), EPS8 (Goicoechea et al., 2006), LASP1 (Rachlin & Otey,  
80 2006), and LPP (Jin, Kern, Otey, Wamhoff, & Somlyo, 2007)) and signaling/adaptor  
81 (SPIN90/NCKIPSD (Ronty et al., 2007), SRC (Ronty et al., 2007), and integrin  $\beta 5$ /ITGB5 (Lai et  
82 al., 2006)) proteins.

83 Consistent with the interaction of PALLD with F-actin and numerous actin binding proteins,  
84 PALLD is associated with various actin-based structures, including focal adhesions, stress fibers,  
85 cell-cell junctions, and Z-lines, and is important for the assembly, organization, and maintenance of  
86 the actin cytoskeleton (reviewed in (Jin, 2011; Otey et al., 2009)). PALLD is well-known for its  
87 involvement in cell motility and smooth muscle cell differentiation, implicating it in cancer (Jin,  
88 2011), while its role in the heart has remained elusive, in part due to embryonic lethality of PALLD  
89 knockout mice (Luo et al., 2005). Thus, to provide insights into the specific role of PALLD in  
90 cardiac muscle, we generated conditional (cPKO) and inducible (cPKOi) cardiomyocyte (CMC)-  
91 specific knockout mice for the most common PALLD isoforms. While conditional knockout of  
92 PALLD in the heart did not cause any pathological cardiac phenotype, PALLD knockdown in adult  
93 heart resulted in left ventricular (LV) dilation and systolic dysfunction, associated with fibrosis and  
94 ICD abnormalities. Furthermore, we identified cardiac ankyrin repeat protein (CARP/Ankrd1) and  
95 formin homology 2 domain containing 1 (FHOD1) as novel interaction partners to the N-terminal

96 region of PALLD. Quantitative real-time PCR (qRT-PCR) analyses on myocardial tissue from  
97 DCM and ischemic cardiomyopathy patients showed increased transcript levels of *MYPN* and the  
98 *PALLD* long isoform in DCM patients, suggesting a possible role of PALLD in cardiac disease

99

## 100 **Results**

101

### 102 **The PALLD N-terminal region binds to CARP/Ankrd1 and FHOD1**

103 To identify potential binding partners to the N-terminal region of the longest 200 kDa PALLD  
104 isoform, of which no interaction partners have previously been identified, we performed a yeast  
105 two-hybrid screening of a human heart cDNA library using the N-terminal region of human  
106 PALLD, comprising the Ig1 and Ig2 domains, as bait. Among the potential interacting proteins  
107 were cardiac ankyrin repeat protein (CARP/Ankrd1) and formin homology 2 domain containing 1  
108 (FHOD1) (*Figure 1A* and *Figure 1–figure supplement 1*).

109 The interaction of PALLD with CARP, a transcriptional cofactor and known interaction-  
110 partner of the corresponding region of MYPN (Bang et al., 2001; Miller et al., 2003), was  
111 confirmed in a NanoBRET protein interaction assay (*Figure 1B*) and stimulated emission depletion  
112 (STED) immunofluorescence microscopy showed the localization of both CARP and PALLD in the  
113 I-band of the sarcomere (*Figure 1C*). Furthermore, PALLD was frequently found in the nucleus of  
114 CMCs, where also CARP is known to localize (*Figure 1D*) (Bang et al., 2001; Miller et al., 2003).  
115 Interestingly, two distinct polyclonal antibodies recognizing all PALLD isoforms (PALLD 622)  
116 (Pogue-Geile et al., 2006) and the PALLD C-terminal region (Proteintech Group), respectively,  
117 showed localization of PALLD in the nucleus, while a monoclonal antibody (4D10) specific for the  
118 second proline-rich region (Parast & Otey, 2000) did not stain the nucleus. Immunofluorescence  
119 stainings on CMCs from CARP knockout mice (Bang et al., 2014) showed no effect on the nuclear  
120 localization of PALLD, leaving out the possibility that CARP is responsible for the targeting of  
121 PALLD to the nucleus (*Figure 1–figure supplement 2*). We did not attempt to further narrow down

122 the interaction site in CARP as we previously demonstrated that full-length CARP is required for  
123 binding to MYPN (Bang et al., 2001).

124 FHOD1 belongs to the formin protein family involved in the regulation of the actin  
125 cytoskeleton (Al Haj et al., 2015; Dwyer, Pluess, Iskratsch, Dos Remedios, & Ehler, 2014). In the  
126 yeast two-hybrid screening, we identified two clones containing the 200 C-terminal amino acid  
127 residues of FHOD1 (**Figure 1A**). By cotransformation of PALLD with truncated FHOD1 constructs  
128 in yeast, the PALLD interaction site was further narrowed down to a region comprising the C-  
129 terminal part of the formin homology 2 (FH2) domain and part of a unique sequence before the C-  
130 terminal diaphanous autoregulatory domain (DAD) (residue 965-1052; **Figure 1A** and **Figure 1-  
131 figure supplement 1B**). The FH2 domain is required for self-association of FHOD1, essential for its  
132 actin regulating activity (Madrid et al., 2005; Takeya & Sumimoto, 2003). The N-terminal region of  
133 MYPN likewise bound to FHOD1 (**Figure 1-figure supplement 1B**). The PALLD-FHOD1  
134 interaction was confirmed in a NanoBRET protein interaction assay (**Figure 1B**) and confocal  
135 microscopy showed colocalization of PALLD with FHOD1 at the ICD as well as the Z-line where  
136 FHOD1 is present at lower levels (**Figure 1E**). At the ICD, PALLD also colocalized with its known  
137 binding partner SORBS2 (**Figure 1F**).

138

### 139 **Conditional CMC-specific PALLD knockout mice (cPKO) exhibit normal cardiac** 140 **morphology and function**

141 To overcome the embryonic lethality of PALLD deficient mice (Luo et al., 2005), which has  
142 previously precluded the analysis of the role of PALLD in the heart, we generated *Palld* floxed  
143 (*Palld*<sup>fl/fl</sup>) mice containing LoxP sites flanking exon 15 (**Figure 2-figure supplement 1A-C**).  
144 *Palld*<sup>fl/fl</sup> mice were crossed with *Myh6*-nuclear-Cre mice (Abel et al., 1999) to generate conditional  
145 CMC-specific PALLD knockout (cPKO) mice in which PALLD is ablated in developing CMCs  
146 from around embryonic day 11 (E11) (Chen et al., 2006). Efficient knockdown of the most common  
147 PALLD isoforms (200 kDa, 140 kDa, 90-92 kDa isoforms) in the heart was confirmed by qRT-

148 PCR (*Figure 2A*), showing a ~75% knockdown in CMCs based on levels of transcripts encoding  
149 the cardiac-specific PALLD 200 kDa isoform, which is not expressed in other cardiac cell types,  
150 such as fibroblasts and smooth muscle cells. Consistently, Western blot analysis showed nearly  
151 complete knockout of PALLD at the protein level (*Figure 2B*) with a ~95% reduction of the  
152 highest expressed 90 kDa isoform (*Figure 2C*). The expression of a smaller weakly expressed  
153 PALLD isoform of about 70 kDa was not affected. This isoform likely corresponds to a short N-  
154 terminal isoform not including exon 15, which was previously detected also in pancreas  
155 (Goicoechea et al., 2010).

156 The effect of PALLD knockout on cardiac morphology and function was analyzed by  
157 echocardiography. As shown in *Figure 2–figure supplement 2A* and *Figure 2–figure supplement*  
158 *3*, no significant differences were found between cPKO and control male mice in any of the  
159 parameters analyzed up to 6 months of age. Consistently, histological analyses showed no cardiac  
160 alterations in cPKO mice compared to control mice (*Figure 2–figure supplement 2B, C*).  
161 Furthermore, in response to mechanical pressure overload induced by transaortic constriction  
162 (TAC), no significant differences were found between cPKO and control mice as shown by  
163 echocardiography (*Figure 2D* and *Figure 2–source data 5*) and histological analyses (*Figure 2E*  
164 and *F*), although there was a tendency towards reduced contractile function in cPKO mice from 2  
165 weeks after TAC.

166

### 167 **Double knockout mice for PALLD and MYPN are indistinguishable from MYPN knockout** 168 **mice**

169 Due to the high structural homology between PALLD and MYPN, we hypothesized that the  
170 essentially absent cardiac pathological phenotype of cPKO mice is due to compensation by MYPN.  
171 To test this, we generated double knockout mice for PALLD and MYPN (cPKO/MKO dKO). We  
172 recently reported that MYPN knockout (MKO) mice develop LV dilation and systolic dysfunction  
173 starting from 4 months of age (Filomena et al., 2021). By echocardiography, cPKO/MKO dKO

174 (*Mypn*<sup>-/-</sup>;*Palld*<sup>fl/fl</sup>:Cre<sup>+0</sup>) mice were found to be indistinguishable from MKO mice both from the  
175 MKO line and derived from the crosses as *Mypn*<sup>-/-</sup>;*Palld*<sup>fl/fl</sup> littermates (**Figure 2G** and **Figure 2–**  
176 **source data 8**), indicating that MYPN is unlikely to compensate for the loss of PALLD in cPKO  
177 mice.

178

### 179 **Ablation of PALLD in adult mice results in DCM and systolic dysfunction**

180 Hypothesizing that compensatory mechanisms during development prevent the development of a  
181 pathological phenotype of cPKO mice, we investigated the effect of PALLD knockout in adult  
182 CMCs. *Palld*<sup>fl/fl</sup> mice were crossed with *Myh6*-MerCreMer transgenic mice (Sohal et al., 2001) to  
183 generate inducible CMC-specific PALLD knockout (cPKOi) mice, which were induced by  
184 tamoxifen (TAM) injection at 7 weeks of age. Effective knockdown of the most common PALLD  
185 isoforms in the heart was confirmed by qRT-PCR 8 weeks after induction, showing an about 80%  
186 reduction in transcripts encoding the cardiac-specific PALLD 200 kDa isoform (**Figure 3A**).  
187 Consistently, Western blot analysis on isolated CMCs showed efficient knockout of the targeted  
188 isoforms (**Figure 3B**) with an ~84% knockdown of the highest expressed 90 kDa isoform (**Figure**  
189 **3C**). Like in cPKO mice, the antibody also recognized a protein of around 70 kDa present at similar  
190 levels in both cPKOi mice and control mice.

191 Echocardiography showed the development of LV dilation and progressive systolic dysfunction  
192 in cPKOi male mice starting from 8 weeks after induction (**Figure 3D** and **E**, and **Figure 3–source**  
193 **data 3**). Intraventricular septum thickness was significantly increased 6 months after TAM  
194 injection, whereas LV posterior wall thickness and heart weight to body weight were unaltered.  
195 Consistent with the reduced systolic function of cPKOi mice, analysis of contractile function and  
196 twitch Ca<sup>2+</sup> transients in ventricular CMCs 3 months after TAM induction showed reduced  
197 sarcomere shortening and Ca<sup>2+</sup> transient amplitude in cPKOi mice compared to control mice  
198 (**Figure 3F**). Time to peak and time to relaxation as well as the rise and decay of Ca<sup>2+</sup> transients  
199 were unaffected. Similarly, measurements of biomechanical properties of myofibril preparations



200 from the LV, showed reduced maximum  $\text{Ca}^{2+}$ -activated isometric tension ( $P_0$ ) of cPKOi myofibrils  
201 compared to controls 8 weeks after TAM induction (see **Table 1**). The kinetics of force generation  
202 and relaxation following rapid  $\text{Ca}^{2+}$  increase and removal were similar in cPKOi and control mice,  
203 indicating that the impairment of active force generation in cPKOi mice is not due to a change in  
204 the number of force generating cross-bridges. The resting tension at optimal sarcomere length  
205 between cPKOi and control preparations was not significantly different between cPKOi and control  
206 preparations (**Table 1**) and the sarcomere length-tension relationship was similar in cPKOi and  
207 control preparations, although there was a tendency towards lower resting tension at longer  
208 sarcomere lengths (**Table 1–figure supplement 1**).

209 Histological analyses 24 weeks after TAM induction showed interstitial fibrosis in the heart of  
210 cPKOi mice, which was not observed in control hearts (**Figure 4A and B**). No apoptosis was  
211 detected by TUNEL staining. Analysis of isolated CMCs showed increased CMC size in PKOi  
212 mice compared to control mice 3 months after TAM induction (**Figure 4C**), which was mainly due  
213 to increased CMC width (**Figure 4D and E**).

214

### 215 **Upregulation of markers of pathological cardiac remodeling in cPKOi mouse heart**

216 To determine the effect of PALLD knockout in adult mice on cardiac gene expression, qRT-PCR  
217 for various genes involved in cardiac remodeling, fibrosis, apoptosis, and inflammation was  
218 performed on LV RNA 6 months after TAM induction (**Figure 4–figure supplement 1**). This  
219 revealed upregulation of the cardiac stress responsive genes *Nppb*, *Myh7*, and *Ankrd1* (**Figure 4F**  
220 and **Figure 4–figure supplement 1**), while *Nppa*, *Myh6*, *Acta1*, and *Actc1* were unaffected. In  
221 addition, although our histological analyses showed interstitial fibrosis in cPKOi hearts, no  
222 significant changes were found in the expression levels of *Colla2*, *Col3a1*, *Ctgf*, *Tgfb1*, and *Acta2*.  
223 Consistent with the absence of apoptosis in cPKOi hearts, the antiapoptotic gene *Bcl2* was  
224 upregulated (**Figure 4F**) and the apoptosis-related genes *Bax* and *Tp53* were unaffected. No  
225 changes were found in genes encoding PALLD interacting proteins (*Nebl*, *Ldb3/Zasp/Cypher*,

226 *Pdlim3*) or other sarcomeric proteins (*Des* and *Tnncl*). The upregulation of *Nppb*, *Myh7*, and  
227 *Ankrd1* suggests cardiac remodeling and the presence of chronic stress in the heart of cPKOi mice,  
228 consistent with an essential role of PALLD for normal heart function.

229

### 230 **Intercalated disc abnormalities in cPKOi mouse hearts**

231 To determine the ultrastructural effects of PALLD knockout, transmission electron microscopy  
232 (TEM) analyses were performed on papillary muscle from cPKOi and control male mice 2 and 6  
233 months after TAM induction. The most noticeable observation was alterations in ICD ultrastructure  
234 in cPKOi mice both 2 and 6 months after TAM induction (**Figure 5**). In particular, cPKOi mice  
235 showed ICDs with abnormal ultrastructure, characterized by partial or total disruption of the  
236 ordered folded regions at the adherens junction, often showing an evidently widened amplitude  
237 (**Figure 5A**). Quantification of ICD fold amplitude (i.e. the lateral width of the folded regions  
238 indicated in **Figure 5B**), revealed a higher, much more variable ICD fold amplitude in cPKOi  
239 compared to control mice as shown by the frequency distribution plots in **Figure 5C** and **D** (left),  
240 showing a rightward shift in cPKOi mice both at 2 and 6 months after TAM induction, with the  
241 greatest variability observed 2 months after TAM induction. Consequently, the average ICD fold  
242 amplitude was increased by ~98.7% and ~76.6% in cPKOi mice vs. control mice 2 and 6 months  
243 after TAM induction, respectively (**Figure 5C** and **D**; right). Detailed analysis of regions containing  
244 high-amplitude ICDs showed very convoluted and abnormal fold regions, often occupied by thick  
245 filaments constituting the A-band of the sarcomere with an evident disruption of the thin actin-  
246 containing filament areas normally observed within the folds of control ICDs (**Figure 5E**). Another  
247 frequent observation was the presence of structural abnormalities in the regions adjoining high-  
248 amplitude ICDs (**Figure 5F**). Specifically, while most sarcomeres had a normal organization, areas  
249 with wavy Z-lines and sarcomere disruption were present in the proximity of high-amplitude ICDs,  
250 where accumulation of vesicles was also often observed in areas of degeneration.

251 Based on the location of PALLD at the ICD and the ICD abnormalities observed in cPKOi

252 mice, we sought to examine whether PALLD ablation affects the localization or expression of other  
253 ICD proteins, including PALLD's interaction partners SORBS2 and FHOD1 as well as components  
254 of the desmosome (desmoplakin, plakoglobin/ $\gamma$ -catenin, plakophilin-2, desmocollin-2, desmoglein-  
255 2, desmin), adherens junction (N-cadherin,  $\alpha$ -E-catenin,  $\beta$ -catenin, plakoglobin/ $\gamma$ -catenin, vinculin),  
256 and gap junction (connexin 43). Immunofluorescence stainings of isolated adult CMCs showed no  
257 alterations in the location of ICD proteins (**Figure 6–figure supplement 1**) and PALLD interacting  
258 proteins (**Figure 6–figure supplement 2**). However, Western blot analyses showed a ~1.5-fold  
259 increase in SORBS2 expression in the LV of cPKOi mice 2 months after TAM induction (**Figure**  
260 **6A and B**). No other changes in the expression of ICD proteins were observed (Fig 6A and B).  
261 Furthermore, no changes in the levels of the PALLD homologue MYPN and PALLD-associated  
262 proteins were found (**Figure 6–figure supplement 3**). Since we recently found that PALLD binds to  
263 titin Ig-domains Z4-Z5 in the Z-line (Filomena et al., 2021) as well as indirectly to the titin N2A  
264 region via CARP (Bang et al., 2001; Miller et al., 2003), we also determined titin isoform  
265 expression and phosphorylation, both known to affect passive stiffness (Loescher, Hobbach, &  
266 Linke, 2021), but found no changes between cPKOi and control mice (**Figure 6–figure supplement**  
267 **4**), consistent with absent effect of PALLD KO on resting tension (**Table 1** and **Table 1–figure**  
268 **supplement 1**). Furthermore, determination of total and phosphorylation levels of various proteins  
269 involved in cardiac signaling showed no alterations (**Figure 6–figure supplement 3**), suggesting  
270 that the DCM phenotype of cPKOi mice is caused by structural changes in the ICD.

271

### 272 **Increased levels of transcripts encoding MYPN and the PALLD 200 kDa isoform in** 273 **myocardial biopsies from human DCM patients**

274 Our findings demonstrating an important role of PALLD for normal cardiac function, prompted us  
275 to determine whether transcript levels of *PALLD* and its striated muscle-specific homologue *MYPN*  
276 are altered during ischemic and non-ischemic cardiac disease. qRT-PCR analysis on LV biopsies  
277 from DCM and ischemic cardiomyopathy (ICM) patients vs. healthy control hearts (for patient

278 details, see **Figure 6–figure supplement 5**) revealed a ~2.7-fold upregulation of *MYPN* mRNA in  
279 DCM patients as well as a similar ~2.5-fold upregulation of *PALLD* mRNA encoding the 200 kDa  
280 striated muscle-specific *PALLD* isoform, structurally homologous to *MYPN* (**Figure 6B**). In  
281 contrast, levels of *PALLD* transcripts encoding the ubiquitously expressed 140 kDa and 90-92 kDa  
282 isoforms of *PALLD* were unaltered. As previously reported, *ANKRD1/CARP* was upregulated in  
283 DCM patients (~4.5-fold) (Bogomolovas et al., 2015; Kempton et al., 2018; Nagueh et al., 2004;  
284 Zolk et al., 2002). None of the transcripts were altered in ICM patients.

285

## 286 **Discussion**

287

288 In the present study, we show that in addition to its known localization in the sarcomeric Z-line,  
289 *PALLD* is located in the I-band, the ICD, and the nucleus of CMCs. The *PALLD* C-terminal region  
290 was previously found to target to the nucleus in podocytes (Endlich et al., 2009) and smooth muscle  
291 cells (SMCs) (Jin et al., 2010), while the N-terminal region was shown to be required for nuclear  
292 export (Endlich et al., 2009). Consistently, immunofluorescence stainings with antibodies towards  
293 all *PALLD* isoforms or the *PALLD* C-terminal region showed the localization of *PALLD* in the  
294 nucleus of CMCs. However, surprisingly, antibodies against the second proline-rich region present  
295 in the major isoforms did not stain the nucleus. This suggests that only isoforms without the second  
296 proline-rich region are present in the nucleus, which is consistent with immunohistochemical  
297 stainings of human biopsies from pancreas (Goicoechea et al., 2010). *PALLD* isoforms containing  
298 5, 4, and 3 Ig-domains both with and without the second proline-rich region are reported in UniProt,  
299 suggesting different cellular functions of *PALLD* isoforms depending on the presence of the second  
300 proline-rich region. As shown in **Figure 1A**, many interaction partners of *PALLD* bind to its second  
301 proline-rich region, including *SORBS2*, which is present in the ICD and Z-line of the heart, so one  
302 possibility could be that the second proline-rich region tethers *PALLD* to the actin cytoskeleton,  
303 preventing it from going to the nucleus.

304 In a yeast two-hybrid screening, we identified CARP and FHOD1 as novel interaction partners  
305 of the PALLD N-terminal region for which no interaction partners have previously been identified.  
306 Since CARP is a well-known interaction partner of the MYPN N-terminal region (Bang et al.,  
307 2001), structurally homologous to the PALLD N-terminal region, it is not surprising that also  
308 PALLD binds to CARP. CARP and MYPN are known to form a complex in the I-band, where  
309 CARP is linked to the titin N2A region (Bang et al., 2001; Miller et al., 2003). Consistently, we  
310 found that also PALLD is located in the I-band, but hypothesize that only the PALLD 200 kDa  
311 isoform containing the N-terminal CARP-binding region is targeted to the I-band. Titin is a largest  
312 known protein, stretching from the Z-line to the M-line and functioning as a molecular spring  
313 responsible for the passive stiffness of striated muscle, implicating it in force transmission and  
314 mechanosensing (Loescher et al., 2021). Thus, based on their link to titin and dual localization in  
315 the sarcomere and the nucleus, CARP and MYPN were previously proposed to form a complex  
316 involved in the transduction of stretch-induced signaling from the sarcomere to the nucleus (Laure  
317 et al., 2010; Miller et al., 2003). To determine whether CARP may be responsible for the targeting  
318 of PALLD to the nucleus, we performed immunofluorescence stainings of CMCs from CARP  
319 knockout mice. However, CARP ablation did not affect the localization of PALLD in the nucleus of  
320 CMCs, questioning the hypothesis of a role of PALLD and MYPN in mechanosensing. Consistent  
321 with targeting experiments in podocytes and SMCs, it is therefore likely that the PALLD C-terminal  
322 region is responsible for its targeting to the nucleus also in CMCs. In particular, based on the  
323 binding of the PALLD Ig3 domain to the transcriptional cofactor MRTF-A (Filomena et al., 2020;  
324 Jin et al., 2010), which cycles between the cytosol and nucleus to regulate SRF signaling, it is  
325 tempting to speculate that MRTF-A is responsible for the targeting of PALLD to the nucleus.  
326 Another possibility could be that PALLD contains a nuclear localization signal (NLS), as  
327 previously predicted by sequence analysis (Endlich et al., 2009). On the other hand, no NLSs were  
328 predicted in MYPN, which is also present in the nucleus. Based on the high homology between the

329 two proteins, we therefore consider it most likely that PALLD and MYPN are transported to the  
330 nucleus through binding to proteins that translocate to the nucleus, such as MRTF-A.

331 The interaction of PALLD with FHOD1 is consistent with its location in the ICD, where it also  
332 binds to SORBS2 (Ronty et al., 2005). FHOD1 has been reported to be localized at the ICD and  
333 costamere of the heart (Al Haj et al., 2015; Dwyer et al., 2014) consistent with our findings. In  
334 contrast, Sanematsu *et al.* showed that FHOD1 is dispensable for normal cardiac development and  
335 function in mouse and failed to detect FHOD1 in the heart (Sanematsu et al., 2019). The reason for  
336 this discrepancy is unclear as several different FHOD1 antibodies were tested in each of the studies.  
337 Nevertheless, the low expression level of FHOD1 in the heart and absence of a cardiac pathological  
338 phenotype of FHOD1 deficient mice questions the relevance of the PALLD-FHOD1 interaction in  
339 CMCs. In contrast, FHOD1 is highly expressed in SMCs and other cell types, where also PALLD is  
340 present, so the interaction is likely to be important in other tissues. FHOD1 suppresses actin  
341 polymerization by inhibiting nucleation and elongation but stabilizes actin filaments by capping the  
342 actin barbed ends, protecting them from depolymerization, while simultaneously mediating F-actin  
343 bundling by connecting them to adjacent actin filaments (Schönichen et al., 2013). In line with this,  
344 FHOD1 silencing was shown to reduce migration and invasion of breast cancer cells by inhibiting  
345 the nuclear translocation of the SRF coactivator MRTF-A, which is sequestered in the cytoplasm by  
346 G-actin and regulated by changes in actin dynamics (Jurmeister et al., 2012). PALLD directly binds  
347 to MRTF-A (Filomena et al., 2020; Jin et al., 2010) and stabilizes the actin cytoskeleton by  
348 promoting actin polymerization and preventing actin depolymerization, consequently promoting  
349 MRTF-mediated activation of SRF signaling (Dixon et al., 2008; Filomena et al., 2020; Gurung et  
350 al., 2016). Thus, it is possible that PALLD and FHOD1 may cooperate in regulating actin dynamics  
351 and SRF signaling.

352 Global knockout of PALLD in mouse was reported to result in embryonic lethality before  
353 E15.5 due to multiple defects, including failure of body walls to close, resulting in exencephaly and  
354 herniation of abdominal organs (Luo et al., 2005). Furthermore, analysis of PALLD knockout

355 embryos revealed a key role of PALLD in the induction of SMC differentiation in the developing  
356 vasculature (Jin et al., 2010) and fibroblasts derived from knockout embryos showed defects in  
357 stress fiber formation, cell adhesion, and motility (Luo et al., 2005). Based on its similarity to  
358 MYPN, associated with different forms of cardiomyopathy (Bagnall et al., 2010; Duboscq-Bidot et  
359 al., 2008; Meyer et al., 2013; Purevjav et al., 2012), as well as high expression levels of specific  
360 PALLD isoforms in cardiac muscle both during development and at adult stage, we hypothesized  
361 that PALLD plays an important role also in the heart (Wang & Moser, 2008).

362 To determine the role of PALLD in the heart in vivo, we floxed *Palld* exon 15, allowing us to  
363 generate conditional (cPKO) and inducible (cPKOi) CMC-specific knockout mice for all PALLD  
364 isoforms except for what we believe is a small N-terminal isoform containing Ig1 and Ig2 and not  
365 including exon 15. Due to extensive differential splicing of PALLD, it was not possible to target all  
366 isoforms. Unexpectedly, cPKO mice exhibited no cardiac pathological phenotype at basal levels  
367 and showed a normal hypertrophic response to TAC, although cPKO mice showed a tendency  
368 towards reduced systolic function compared to control mice. In contrast, cPKOi mice induced at  
369 adult stage developed cardiac dilation and systolic dysfunction within 8 weeks after TAM  
370 induction, associated with interstitial fibrosis and upregulation of cardiac stress markers.  
371 Consistently, reduced sarcomere shortening and  $Ca^{2+}$  transient amplitude were observed in CMCs,  
372 and decreased maximum  $Ca^{2+}$ -activated isometric tension was found in cPKOi myofibrils, while the  
373 kinetics of contraction were unaffected. The heart weight to body weight ratio was unaltered,  
374 although CMC size was increased, mainly due to increased CMC width.

375 At the ultrastructural level, ICDs in cPKOi mice were disorganized and more convoluted  
376 compared to those of control mice. The ICD is a highly complex structure joining together adjacent  
377 CMCs in the heart and is made up of three major complexes: adherens junctions, where actin  
378 filaments are anchored and connect the sarcomere to the cell membrane; desmosomes, which tether  
379 the cell membrane to the intermediate filament network; and gap junctions, which permit the  
380 passage of ions and small molecules between neighboring CMCs, allowing for electrical and

381 metabolic coupling between cells (reviewed in (Vermij, Abriel, & van Veen, 2017)). In contrast to  
382 previous belief, rather than functioning independently, the three junctions cooperate via crosstalk  
383 between their components in mixed-type junctions termed “*area composita*” (Borrmann et al.,  
384 2006; Franke, Borrmann, Grund, & Pieperhoff, 2006). Thus, the ICD can be considered as a single  
385 functional unit important for mechanical coupling and transmission of contractile force and  
386 electrical signals between adjacent CMCs. PALLD plays a well-known role in the organization of  
387 the actin cytoskeleton (Jin, 2011; Otey et al., 2009) and binds directly to F-actin (Dixon et al.,  
388 2008), ALP (von Nandelstadh et al., 2009), and SORBS2 (Ronty et al., 2005), which are associated  
389 with the adherens junction (Ding et al., 2020; Pashmforoush et al., 2001). Thus, destabilization of  
390 the adherens junction in cPKOi mice may be responsible for the structural alterations at the ICD,  
391 also affecting nearby sarcomeres, as evident by Z-line abnormalities and sarcomere disruption in  
392 the vicinity of the adherens junction in high-amplitude ICDs. PALLD also interacts with several  
393 components of the transitional junction, where the contractile apparatus is connected the ICD to  
394 allow force transmission between adjacent CMCs (Bennett, 2012). In particular, titin (Filomena et  
395 al., 2021),  $\alpha$ -actinin (Bang et al., 2001; Ronty et al., 2004), and cypher (von Nandelstadh et al.,  
396 2009), all interaction partners of PALLD, are associated with the transitional junction, suggesting a  
397 possible effect of PALLD on the attachment of the myofilament to the ICD and the stability of the  
398 junction. Immunofluorescence stainings and Western blot analyses did not show any changes in the  
399 localization of ICD proteins, including the PALLD interaction partners FHOD1 and SORBS2.  
400 However, the protein level of SORBS2 was ~1.6-fold upregulated in cPKOi heart. SORBS2, also  
401 known as Arg kinase-binding protein 2 (ArgBP2), is a scaffold protein localized at the adherens  
402 junction of the ICD as well as the Z-line at lower levels (Ding et al., 2020). SORBS2  
403 overexpression in mouse heart was reported to lead to upregulation of  $\beta$ -tubulin, a direct interaction  
404 partner of SORBS2, and consequent microtubule densification, resulting in junctophilin 2  
405 translocation, T-tubule disorganization, defective excitation-contraction coupling, and systolic  
406 dysfunction (C. Li et al., 2020). Furthermore, SORBS was found to be upregulated in patients with



407 left ventricular non-compaction (LVNC), but not HCM and arrhythmogenic cardiomyopathy, and  
408 may play a role in the progression of heart failure in LVNC patients (C. Li et al., 2020). Thus,  
409 increased SORBS2 expression in cPKOi mice may contribute to ICD instability and cardiac  
410 dysfunction. ICD alterations, such as altered expression of ICD proteins and increased, more  
411 variable ICD amplitude, are commonly associated with DCM both in human and mouse (Wilson,  
412 Schoenauer, Ehler, Agarkova, & Bennett, 2014). In addition, mutations in several genes encoding  
413 ICD proteins have been associated with DCM (*VCL*, *DSP*, *DSG2*, *DES*) and several knockout  
414 mouse models of adheres junction and desmosomal proteins develop DCM (Bang, Bogomolovas, &  
415 Chen, 2022; Hirschy et al., 2010; Kostetskii et al., 2005; J. Li et al., 2012; Norgett et al., 2000;  
416 Sheikh et al., 2006; Zemljic-Harpf et al., 2007). Thus, it is plausible to suggest that structural  
417 alteration of the ICD in the absence of PALLD is the primary event leading to DCM and systolic  
418 dysfunction in cPKOi mice. Interestingly, MKO mice, which developed a mild form of DCM under  
419 basal conditions, also showed an increase in ICD fold amplitude, although only by ~27% and  
420 without other obvious ICD abnormalities (Filomena et al., 2021), suggesting that PALLD plays a  
421 more important structural role in the ICD than MYPN.

422 The absence of a pathological cardiac phenotype in cPKO mice is surprising based on the  
423 rather severe cardiac phenotype of cPKOi mice induced at adult stage. To rule out the possibility  
424 that the phenotype of cPKOi mice is due to the toxic effect of TAM, we injected cPKO with TAM  
425 and subsequently evaluated cardiac function by echocardiography. However, this did not induce  
426 any cardiac pathological phenotype, suggesting that early ablation of PALLD allows for the  
427 activation of compensatory mechanisms. Due to the structural homology of PALLD to MYPN, we  
428 hypothesized that MYPN can compensate for the absence of PALLD. However, the phenotype of  
429 cPKO/MKO dKO mice was indistinguishable from that of MKO mice, strongly suggesting that  
430 MYPN does not compensate for the loss of PALLD in cPKO mice. Another possibility is that the  
431 small N-terminal PALLD isoform not targeted by our knockout approach can compensate for the  
432 absence of the other PALLD isoforms when absent during development. However, the isoform was

433 not upregulated in cPKO mice and does not contain binding sites for most of the PALLD  
434 interaction partners, so we consider this rather unlikely. We hypothesize that when PALLD is  
435 knocked out during embryonic development, the mice are able to adapt through activation of  
436 compensatory mechanisms, whereas this is not anymore possible when PALLD is knocked out in  
437 adult mice. This phenomenon has also been observed in other genetic models (reviewed in (El-  
438 Brolosy & Stainier, 2017)).

439 Analysis of *MYPN* and *PALLD* mRNA levels in LV biopsies from human ICM and DCM  
440 patients showed a ~2.7-fold upregulation of *MYPN* and a similar ~2.5-fold upregulation of the  
441 structurally similar *PALLD* 200 kDa isoform in DCM hearts, while the expression of the 140 and 90  
442 *PALLD* isoforms were unaltered. For comparison, in two RNA-Seq studies, *MYPN* was reported to  
443 be ~1.6 upregulated in DCM/non-ischemic cardiomyopathy (NICM) and ~1.5 to ~1.7 fold  
444 upregulated in ICM hearts vs. healthy control hearts (Sweet et al., 2018; Yang et al., 2014),  
445 confirming the upregulation of *MYPN* transcripts in DCM patients. The higher upregulation of  
446 *MYPN* in DCM patients and absent modulation in ICM patients found in the present study may be  
447 because of different patient cohorts and detection methods used. In contrast to the present study,  
448 where we found a ~2.5-fold upregulation of the 200 kDa *PALLD* isoform, the two RNA-Seq  
449 studies reported a ~1.6 to ~2.1-fold downregulation of *PALLD* in both DCM/NICM and ICM  
450 patients. The apparent discrepancy can be explained by the fact that only the *PALLD* 200 kDa  
451 isoform is upregulated in DCM patients, while the RNA-Seq studies do not distinguish between  
452 different *PALLD* isoforms. The specific upregulation of only the *PALLD* 200 kDa isoform suggests  
453 that it has a specific function in the heart, consistent with its predominant expression in striated  
454 muscle. Future studies will be required to determine the significance of the upregulation of *MYPN*  
455 and the *PALLD* 200 kDa isoform in DCM and whether the two genes may represent potential  
456 biomarkers.

457 Altogether, our data demonstrate an important role of *PALLD* for normal heart function,  
458 suggesting *PALLD* as a possible candidate gene for cardiomyopathy. Based on the absence of a

459 phenotype in PKO mice, loss-of-function mutations are unlikely to affect cardiac function and  
460 would likely lead to embryonic lethality due to the essential role of *PALLD* in other tissues and cell  
461 types. However, as for MYPN, whose ablation does not severely affect cardiac function, it is  
462 possible that mutations with dominant negative effects, especially within the 200 kDa *PALLD*  
463 isoform principally expressed in striated muscle, may be linked to cardiac disease. The reason why  
464 as of yet a link between *PALLD* mutations to cardiac disease has not been established could be due  
465 to lack of focus on the *PALLD* gene.

466

## 467 Materials and Methods

### Key Resources Table

| Reagent type (species) or resource                   | Designation                                                  | Source or reference      | Identifiers                             | Additional information |
|------------------------------------------------------|--------------------------------------------------------------|--------------------------|-----------------------------------------|------------------------|
| Strain, strain background (male <i>M. musculus</i> ) | MYPN knockout (MKO) mice (C57BL/6J background)               | Filomena et al., 2020    | N/A                                     |                        |
| Strain, strain background (male <i>M. musculus</i> ) | <i>PALLD</i> floxed mice (C57BL/6J background)               | This paper               | N/A                                     |                        |
| Strain, strain background (male <i>M. musculus</i> ) | <i>Myh6</i> -nuclear-Cre mice (C57BL/6J background)          | Abel et al., 1999        | N/A                                     |                        |
| Strain, strain background (male <i>M. musculus</i> ) | <i>Myh6</i> -MerCreMer transgenic mice (C57BL/6J background) | Sohal et al., 2001       | N/A                                     |                        |
| Strain, strain background ( <i>M. musculus</i> )     | C57BL/6J                                                     | The Jackson Laboratories | Cat# 000664<br>RRID:IMSR_JA<br>X:000664 |                        |
| Strain, strain background ( <i>E. coli</i> )         | DH5 $\alpha$ electrocompetent cells                          | New England BioLabs      | Cat# C2989K                             |                        |
| Strain, strain background ( <i>S. cerevisiae</i> )   | Y2H Gold yeast strain                                        | Takara Bio               | Cat# 630498                             |                        |

|                                                               |                                            |                                             |                                                                                         |                            |
|---------------------------------------------------------------|--------------------------------------------|---------------------------------------------|-----------------------------------------------------------------------------------------|----------------------------|
| Strain, strain background ( <i>Saccharomyces cerevisiae</i> ) | L40 yeast strain                           | Takara Bio                                  | N/A                                                                                     |                            |
| Antibody                                                      | anti-PALLD 622 (rabbit polyclonal)         | Pogue-Geile et al., 2006                    | Kindly provided by Prof. Carol Otey, University of North Carolina, Chapel Hill, NC, USA | WB (1:500)<br>IF (1:30)    |
| Antibody                                                      | Anti-PALLD Proteintech (rabbit polyclonal) | Proteintech Group                           | Cat# 10853-1-AP                                                                         | WB (1:1000)<br>IF (1:30)   |
| Antibody                                                      | Anti-PALLD 1E6 (mouse monoclonal)          | Parast and Otey, 2000<br>Novus Biochemicals | Cat# NBP1-25959                                                                         | WB (1:1000)<br>IF (1:20)   |
| Antibody                                                      | Anti-PALLD 4D10 (mouse monoclonal)         | Parast and Otey, 2000                       | N/A                                                                                     | IF (1:10)                  |
| Antibody                                                      | anti-MYPN (rabbit polyclonal)              | Yamamoto et al., 2013                       | N/A                                                                                     | WB (1:1000)                |
| Antibody                                                      | anti-nebulette (rabbit polyclonal)         | Mastrototaro et al., 2015                   | N/A                                                                                     | WB (1:200)<br>IF (1:20)    |
| Antibody                                                      | anti- $\alpha$ -actinin (mouse monoclonal) | Merck Life Science                          | Cat# A7811<br>RRID:AB_476766                                                            | WB (1:50000)<br>IF (1:250) |
| Antibody                                                      | anti-ANKRD1/CARP (rabbit polyclonal)       | Miller et al., 2003                         | N/A                                                                                     | WB (1:200)<br>IF (1:20)    |
| Antibody                                                      | anti-Cypher (rabbit polyclonal)            | Zhou <i>et al.</i> , 2013                   | Kindly provided by Prof. Ju Chen, University of California San Diego, La Jolla, CA, USA | WB (1:500)<br>IF (1:20)    |
| Antibody                                                      | anti-MKL1/MRTF-A (rabbit polyclonal)       | Santa Cruz Biotechnology                    | Cat# sc-21558                                                                           | WB (1:500)<br>IF (1:20)    |
| Antibody                                                      | anti-MKL1/MRTF-A (rabbit polyclonal)       | Immunological Sciences                      | Cat# AB-84312<br>RRID:AB_2892156                                                        | WB (1:500)                 |

|          |                                                         |                           |                                                                                                              |                          |
|----------|---------------------------------------------------------|---------------------------|--------------------------------------------------------------------------------------------------------------|--------------------------|
| Antibody | Calpain 3                                               | (König et al., 2003)      | Kindly provided by Prof. Ahmed Ouali, QuaPA, INRA de Clermont Ferrand - Theix, St Genès Champanelle, France. | WB (1:500)               |
| Antibody | anti-desmin (rabbit polyclonal)                         | Abcam                     | Cat# Ab8592<br>RRID:AB_306653                                                                                | IF (1:80)                |
| Antibody | Anti-SORBS2 (mouse monoclonal)                          | Merck Life Science        | Cat# SAB4200183<br>RRID:AB_10638778                                                                          | WB (1:750)<br>IF (1:30)  |
| Antibody | Anti-FHOD1 (goat polyclonal)                            | Santa Cruz Biotechnology  | Cat# sc-46965<br>RRID:AB_2247011                                                                             | WB (1:500)<br>IF (1:30)  |
| Antibody | Anti-desmoplakin 1/2 (mouse monoclonal)                 | Bio-Rad Laboratories      | Cat# 2722-5204<br>RRID:AB_619950                                                                             | WB (1:750)<br>IF (1:20)  |
| Antibody | Anti-N-cadherin (mouse monoclonal)                      | Cell Signaling Technology | Cat# 4061<br>RRID:AB_10694647                                                                                | WB (1:1000)<br>IF (1:80) |
| Antibody | anti- $\alpha$ -E-catenin (mouse monoclonal)            | Santa Cruz Biotechnology  | Cat# sc-9988<br>RRID:AB_626805                                                                               | WB (1:1000)<br>IF (1:20) |
| Antibody | anti- $\beta$ -catenin (rabbit monoclonal)              | Cell Signaling Technology | Cat# 8480<br>RRID:AB_11127855                                                                                | WB (1:1000)<br>IF (1:25) |
| Antibody | anti- $\gamma$ -catenin/plakoglobin (rabbit polyclonal) | Immunological Sciences    | AB-90215<br>RRID:AB_2892157                                                                                  | WB (1:1000)<br>IF (1:20) |
| Antibody | Anti-vinculin (mouse monoclonal)                        | Merck Life Science        | Cat# V9264<br>RRID:AB_10603627                                                                               | WB (1:2000)<br>IF (1:80) |
| Antibody | Anti-desmocollin 2 (rabbit monoclonal)                  | Fitzgerald                | Cat# 20R-RRID:DR004AB_1284102                                                                                | IF (1:50)                |

|          |                                                                 |                           |                                       |                         |
|----------|-----------------------------------------------------------------|---------------------------|---------------------------------------|-------------------------|
| Antibody | Anti-desmoglein 1 + 2<br>(mouse monoclonal)                     | Fitzgerald                | Cat# 10R-D105A<br>RRID:<br>AB_1284107 | WB (1:500)<br>IF (1:30) |
| Antibody | Anti-plakophilin 2<br>(mouse monoclonal)                        | Fitzgerald                | Cat# 10R-P130B<br>RRID:<br>AB_1288393 | IF (1:50)               |
| Antibody | Anti-connexin 43<br>(mouse monoclonal)                          | Thermo Fisher Scientific  | Cat# 35-5000<br>RRID:AB_87322         | WB (1:400)<br>IF (1:50) |
| Antibody | Anti-Smad1/5-Ser463/465/Smad8-Ser426/428<br>(rabbit polyclonal) | Cell Signaling Technology | Cat# 9511<br>RRID:<br>AB_331671       | WB (1:1000)             |
| Antibody | Anti-PKC $\alpha$<br>(rabbit polyclonal)                        | Cell Signaling Technology | Cat# 2056<br>RRID:<br>AB_2284227      | WB (1:1000)             |
| Antibody | Anti-pPDK-Ser241<br>(rabbit polyclonal)                         | Cell Signaling Technology | Cat# 3438<br>RRID:<br>AB_2161134      | WB (1:1000)             |
| Antibody | anti-Akt (rabbit polyclonal)                                    | Cell Signaling Technology | Cat# 9272<br>RRID:AB_329827           | WB (1:1000)             |
| Antibody | Anti-pAkt-Thr308<br>(rabbit polyclonal)                         | Cell Signaling Technology | Cat# 2965<br>RRID:<br>AB_2255933      | WB (1:500)              |
| Antibody | Anti-pAkt-Ser473<br>(rabbit polyclonal)                         | Cell Signaling Technology | Cat# 4060<br>RRID:<br>AB_2315049      | WB (1:500)              |
| Antibody | Anti-pGSK3 $\beta$ -Ser9<br>(rabbit polyclonal)                 | Cell Signaling Technology | Cat# 5558<br>RRID:<br>AB_10013750     | WB (1:500)              |
| Antibody | Anti-GSK3 $\beta$<br>(rabbit polyclonal)                        | Cell Signaling Technology | Cat# 9315<br>RRID:<br>AB_490890       | WB (1:1000)             |
| Antibody | Anti-pP70-Ser6K-Thr421/Ser424<br>(rabbit polyclonal)            | Cell Signaling Technology | Cat# 9204<br>RRID:<br>AB_2265913      | WB (1:500)              |
| Antibody | Anti-P70-Ser6K<br>(rabbit polyclonal)                           | Cell Signaling Technology | Cat# 2708<br>RRID:<br>AB_390722       | WB (1:500)              |
| Antibody | Anti-pMEK1/2-Ser217/221                                         | Cell Signaling Technology | Cat# 9154<br>RRID:                    | WB (1:500)              |

|          |                                                                                                      |                           |                                    |              |
|----------|------------------------------------------------------------------------------------------------------|---------------------------|------------------------------------|--------------|
|          | (rabbit polyclonal)                                                                                  |                           | AB_2138017                         |              |
| Antibody | anti-pErk1/2-Thr202/Tyr204 (rabbit polyclonal)                                                       | Cell Signaling Technology | Cat# 4370<br>RRID:AB_2315112       | WB (1:500)   |
| Antibody | anti-Erk1/2 (mouse monoclonal)                                                                       | Santa Cruz Biotechnology  | Cat# sc-514302<br>RRID:AB_2571739  | WB (1:1000)  |
| Antibody | Anti-pP38-Thr180/Tyr182 (rabbit polyclonal)                                                          | Cell Signaling Technology | Cat# 4631<br>RRID:AB_331765        | WB (1:500)   |
| Antibody | anti-P38 $\alpha/\beta$ (mouse monoclonal)                                                           | Santa Cruz Biotechnology  | Cat# sc-7972<br>RRID:AB_628079     | WB (1:500)   |
| Antibody | Anti-phosphoserine/threonine (rabbit polyclonal)                                                     | ECM Biosciences           | Cat#PP2551<br>RRID:AB_1184778      | WB (1:500)   |
| Antibody | Anti-phosphoserine/threonine (rabbit polyclonal)                                                     | ECM Biosciences           | Cat# PP2551<br>RRID:AB_118478      | WB (1:500)   |
| Antibody | Anti-pTTN-Ser3991 (rabbit polyclonal)                                                                | Kotter et al., 2013       | N/A                                | WB (1:500)   |
| Antibody | Anti-pTTN-Ser4080 (rabbit polyclonal)                                                                | Kotter et al., 2013       | N/A                                | WB (1:500)   |
| Antibody | Anti-pTTN-Ser12742 (rabbit polyclonal)                                                               | Kotter et al., 2013       | N/A                                | WB (1:500)   |
| Antibody | Anti-GAPDH (rabbit polyclonal)                                                                       | Proteintech               | Cat# 10494-1-AP<br>RRID:AB_2263076 | WB (1:15000) |
| Antibody | Goat anti-mouse IgG (H + L) Highly-cross Adsorbed Secondary antibody, Alexa Fluor 488-conjugated IgG | Thermo Fisher Scientific  | Cat# A11029<br>RRID:AB_138404      | IF (1:500)   |
| Antibody | Goat anti-rabbit IgG (H + L) Highly-cross Adsorbed                                                   | Thermo Fisher Scientific  | Cat# A11034<br>RRID:AB_2576217     | IF (1:500)   |

|                         |                                                                                        |                          |                                 |             |
|-------------------------|----------------------------------------------------------------------------------------|--------------------------|---------------------------------|-------------|
|                         | Secondary antibody, Alexa Fluor 488                                                    |                          |                                 |             |
| Antibody                | Goat anti-mouse IgG (H + L) Highly-cross Adsorbed Secondary antibody, Alexa Fluor 568  | Thermo Fisher Scientific | Cat# A11031<br>RRID:AB_144696   | IF (1:500)  |
| Antibody                | Goat anti-rabbit IgG (H + L) Highly-cross Adsorbed Secondary antibody, Alexa Fluor 568 | Thermo Fisher Scientific | Cat# A11036<br>RRID:AB_10563566 | IF (1:500)  |
| Antibody                | Goat anti-mouse IgG (H + L) Highly-cross Adsorbed Secondary antibody, Alexa Fluor 647  | Thermo Fisher Scientific | Cat# A21236<br>RRID:AB_2535805  | IF (1:500)  |
| Antibody                | Goat anti-rabbit IgG (H + L) Highly-cross Adsorbed Secondary antibody, Alexa Fluor 647 | Thermo Fisher Scientific | Cat# A21245<br>RRID:AB_2535813  | IF (1:500)  |
| Antibody                | Goat anti-rabbit IgG Horseradish Peroxidase (HRP)                                      | Thermo Fisher Scientific | Cat# 31460<br>RRID:AB_228341    | WB (1:5000) |
| Antibody                | Goat anti-mouse IgG-HRP                                                                | Thermo Fisher Scientific | Cat# 31430<br>RRID:AB_228307    | WB (1:5000) |
| Antibody                | Donkey anti-goat IgG-HRP                                                               | Santa Cruz Biotechnology | Cat# sc-2020<br>RRID:AB_631728  | WB (1:2000) |
| Recombinant DNA reagent | pGBKT7 DNA-BD vector                                                                   | Takara Bio               | Cat# 630443                     |             |
| Recombinant DNA reagent | pGADT7 AD vector                                                                       | Takara Bio               | Cat# 630442                     |             |
| Recombinant DNA reagent | Mate & Plate™ Human Heart library                                                      | Takara Bio               | Cat# 630471                     |             |



|                         |                                                                            |            |     |                                         |
|-------------------------|----------------------------------------------------------------------------|------------|-----|-----------------------------------------|
| Recombinant DNA reagent | pGBKT7 human MYPN N-term start-Ig2 (bp 233-1798; aa. 1-522; NM_032578.3)   | This paper | N/A | Cloning primers in Supplementary file 1 |
| Recombinant DNA reagent | pGBKT7 human MYPN C-term Ig3-end (bp 3044-4195; aa. 938-1320; NM_032578.3) | This paper | N/A | Cloning primers in Supplementary file 1 |
| Recombinant DNA reagent | pGBKT7 human MYPN full-length                                              | This paper | N/A | Cloning primers in Supplementary file 1 |
| Recombinant DNA reagent | pGBKT7 human PALLD full-length                                             | This paper | N/A | Cloning primers in Supplementary file 1 |
| Recombinant DNA reagent | pGBKT7 human PALLD N-term start-Ig2 (bp 212-1795; aa. 1-528; NM_001166108) | This paper | N/A | Cloning primers in Supplementary file 1 |
| Recombinant DNA reagent | pGBKT7 mouse PALLD C-term Ig3-end (bp 1146-2309; aa 267-680; BC127081)     | This paper | N/A | Cloning primers in Supplementary file 1 |
| Recombinant DNA reagent | pGADT7-AD human CARP full-length                                           | This paper | N/A | Cloning primers in Supplementary file 1 |
| Recombinant DNA reagent | pGADT7-AD human FHOD1 (bp 3005-3607, aa. 965-1164; NM_013241.2)            | This paper | N/A | Cloning primers in Supplementary file 1 |
| Recombinant DNA reagent | pGADT7-AD human FHOD1 (bp3005-3268, aa. 965-1052; NM_013241.2)             | This paper | N/A | Cloning primers in Supplementary file 1 |
| Recombinant DNA reagent | pGADT7-AD human FHOD1 (bp 3152-3607, aa. 1014-1164; NM_013241.2)           | This paper | N/A | Cloning primers in Supplementary file 1 |
| Recombinant DNA reagent | pFN21A HaloTag CMV Flexi vector human PALLD full-length                    | This paper | N/A | Cloning primers in Supplementary file 1 |
| Recombinant             | pNLF1-N [CMV                                                               | This paper | N/A | Cloning primers in                      |

|                            |                                                                                  |                             |                     |                                            |
|----------------------------|----------------------------------------------------------------------------------|-----------------------------|---------------------|--------------------------------------------|
| DNA reagent                | Hygro] mouse<br>FHOD1 Y2H clone<br>(bp3106-3711, aa.<br>997-1197;<br>NM_013468.3 |                             |                     | Supplementary file 1                       |
| Recombinant<br>DNA reagent | pNLF1-C [CMV<br>Hygro] mouse<br>CARP (bp 64-1023;<br>aa. 1-319;<br>NM_013468.3)  | This paper                  | N/A                 | Cloning primers in<br>Supplementary file 1 |
| Sequence-based<br>reagent  | qRT-PCR primers                                                                  | This paper                  | N/A                 | Supplementary file 1                       |
| Commercial<br>assay or kit | In-Fusion HD<br>Cloning kit                                                      | Takara Bio                  | Cat# 639650         |                                            |
| Commercial<br>assay or kit | DC <sup>TM</sup> Protein Assay<br>Kit II                                         | Bio-Rad<br>Laboratories     | Cat# 5000112        |                                            |
| Commercial<br>assay or kit | Frozen-EZ Yeast<br>Transformation II kit                                         | Zymo Research               | Cat# T2001          |                                            |
| Commercial<br>assay or kit | HaloTag NanoBRET<br>618 Ligand                                                   | Promega                     | Cat# G9801          |                                            |
| Chemical<br>compound, drug | Aureobasidin A                                                                   | Takara Bio                  | Cat# 630499         |                                            |
| Chemical<br>compound, drug | X- $\alpha$ -Gal                                                                 | Takara Bio                  | Cat# 630463         |                                            |
| Chemical<br>compound, drug | PureZOL RNA<br>isolation reagent                                                 | Bio-Rad<br>Laboratories     | Cat# 7326890        |                                            |
| Chemical<br>compound, drug | High Capacity<br>cDNA Reverse<br>Transcription kit                               | Thermo Fisher<br>Scientific | Cat# 4368814        |                                            |
| Chemical<br>compound, drug | SYBR Select<br>Master Mix                                                        | Thermo Fisher<br>Scientific | Cat# 4472903        |                                            |
| Chemical<br>compound, drug | Roche cOMplete<br>Protease Inhibitor<br>Cocktail                                 | Thermo Fisher<br>Scientific | Cat#<br>11697498001 |                                            |
| Chemical<br>compound, drug | Pierce <sup>TM</sup><br>Phosphatase<br>Inhibitor Mini<br>Tablets                 | Thermo Fisher<br>Scientific | Cat# A32957         |                                            |
| Chemical<br>compound, drug | Immobilon <sup>TM</sup><br>Western<br>Chemiluminescent<br>HRP Substrate          | Merck Life<br>Science       | Cat#<br>WBKLS0500   |                                            |
| Chemical                   | Rhodamine                                                                        | Thermo Fisher               | Cat# R415           | IF (1:100)                                 |

|                         |                                                             |                                    |                                                                                                                                          |                                                             |
|-------------------------|-------------------------------------------------------------|------------------------------------|------------------------------------------------------------------------------------------------------------------------------------------|-------------------------------------------------------------|
| compound, drug          | phalloidin                                                  | Scientific                         |                                                                                                                                          |                                                             |
| Chemical compound, drug | Wheat Germ Agglutinin, Alexa Fluor™ 594 Conjugate           | Thermo Fisher Scientific           | Cat# W11262                                                                                                                              | IF (1:500)                                                  |
| Chemical compound, drug | VECTASHIELD® Vibrance™ Antifade Mounting Medium with DAPI   | D.B.A Italia Srl.                  | Cat# H-1800-10                                                                                                                           |                                                             |
| Chemical compound, drug | Liberase Blendzyme                                          | Roche Diagnostics                  | Cat# 11988468001                                                                                                                         |                                                             |
| Chemical compound, drug | Fura-2, AM, cell permeant                                   | Thermo Fisher Scientific           | Cat# F1201                                                                                                                               |                                                             |
| Software, algorithm     | Prism, version 7.0                                          | GraphPad Software Inc.             | <a href="https://www.graphpad.com/scientific-software/prism/">https://www.graphpad.com/scientific-software/prism/</a><br>RRID:SCR_002798 |                                                             |
| Software, algorithm     | Fiji (ImageJ) analysis software, version 2.0.0-rc-69/1.52p) | National Institute of Health (NIH) | <a href="https://fiji.sc/">https://fiji.sc/</a><br>RRID:SCR_002285                                                                       | SparkMaster plugin used for Ca <sup>2+</sup> spark analysis |
| Software, algorithm     | NT Affinity Analysis software, version 2.0.1334             | NanoTemper Technologies            | N/A                                                                                                                                      |                                                             |
| Software, algorithm     | Ion Wizard, software, version 6.6.11                        | IonOptix B.V.                      | N/A                                                                                                                                      |                                                             |

468

## 469 **Animal experiments**

470 All animal experiments were approved by the Italian Ministry of Health (Approval 12/2011) and  
 471 performed in full compliance with the rules and regulations of the European Union (Directive  
 472 2010/63/EU of the European Parliament) and Italy (Council of 22 September 2010; directive from  
 473 the Italian Ministry of Health) on the protection of animal use for scientific purposes. Mice used for  
 474 experiments were sacrificed by cervical dislocation under isoflurane anesthesia. Animals were  
 475 randomly assigned to different experimental groups before the start of experiments. The  
 476 investigators were blinded to genotype and treatment.

477

478 **Generation of conditional (cPKO) and inducible (cPKOi) cardiac muscle specific PALLD KO**  
479 **mice**

480 *Palld* genomic DNA was obtained from a 129SVJ mouse genomic library (Stratagene, La Jolla,  
481 CA) and used for the generation of a targeting construct containing *loxP* sites flanking exon 15  
482 (according to the nomenclature of Wang and Moser (Wang & Moser, 2008);  
483 GGGGTTCCTCCAAAGAAGTCCAGTAGAACTGCTAGAATTGCCTCTGATGAGGAGATTCAA  
484 GGCACAAAGGATGCTGTCATCCAAGACCTGGAACGGAAGCTTCGCTTCAAGGAGGACC  
485 TTCTGAACAATGGCCAACCG; NCBI Gene ID: 72333) as well as a neomycin (neo) cassette  
486 flanked by Flpase Recognition Target (FRT) sites. Exon 15 was floxed, since it is present in the  
487 most common PALLD isoforms (90-92 kDa, 140 kDa, 200 kDa) and contains a number of  
488 nucleotides not evenly dividable by 3, so that Cre-mediated recombination would result in an early  
489 stop codon and consequent mRNA degradation. The construct was generated in the pBluescript II  
490 KS+ vector, and the 5' arm of homology consisted of a 3,983 bp *NotI*–*EcoRV* fragment (5' forward:  
491 gctccaccgcggtggcggccgc/AGAGCAGTTATCCTAAG; 5' reverse:  
492 gttatattaagggttccggatcgatgatc/AACATGAAATG) fused with a *loxP* site upstream of *Palld* exon  
493 15. The 3' arm of homology was a 3,062 kb *SalI*–*SalI* fragment (3' forward:  
494 ccaagctgatcctctagagtcgac/TCCATGAGGCTCTGTC, and 3' reverse:  
495 cgggccccctcgaggtcgac/GGAAAGGAAAACACAG) located downstream of exon 15 followed by  
496 a FRT-neo-FRT cassette and a second *loxP* site (**Figure 2–figure supplement 1**). The Diphtheria  
497 toxin A fragment (DTA) gene was inserted for negative selection. The final targeting construct was  
498 verified by sequencing and linearized with *NotI* before electroporation into R1 embryonic stem (ES)  
499 cells at the Transgenic Core Facility at the University of California San Diego. G418-resistant ES  
500 clones were screened for homologous recombination by Southern blot analysis of *EcoRV*-digested  
501 ES cell DNA with a 471 bp probe generated by PCR on mouse genomic DNA with *palld* specific  
502 primers (sense: ATTCTTGAATGTATGGTGCCCTTGA; reverse:

503 CTCAAAGCAGACCTCATCACAAAAC) (see **Figure 2–figure supplement 1A and B**). The wild-  
504 type allele is represented by the band of 19,607 bp, whereas the 10,130 bp band represents the  
505 correctly targeted mutant allele. One clone out of 480 G418-resistant ES clones that had undergone  
506 homologous recombination was identified. The homologous recombinant ES clone was  
507 microinjected into C57BL/6J blastocysts and transferred into pseudopregnant mice. Male chimeras  
508 were bred with female C57BL/6J mice to generate germ line transmitted heterozygous *Palld* floxed  
509 (*Palld*<sup>fl/+</sup>) mice, which were crossed with FLPe deleter mice (KANKI, SUZUKI, & ITOHARA,  
510 2006) to remove the *neo* gene and subsequently backcrossed for 6 generations with C57BL/6J mice.  
511 To generate conditional cardiac specific knockout (cPKO) mice, homozygous *Palld* floxed  
512 (*Palld*<sup>fl/fl</sup>) mice were interbred with *Myh6*-nuclear-Cre (Abel et al., 1999) mice. The resulting  
513 *Palld*<sup>fl/+</sup>;Cre<sup>+0</sup> mice were crossed with *Palld*<sup>fl/+</sup>;Cre<sup>0/0</sup> mice to generate *Palld*<sup>fl/fl</sup>;Cre<sup>+0</sup> mice as  
514 cPKO mice and *Palld*<sup>fl/fl</sup>;Cre<sup>0/0</sup> (*Palld*<sup>fl/fl</sup>) mice as littermate controls. Furthermore, *Palld*<sup>+/+</sup>;Cre<sup>+0</sup>  
515 (Cre<sup>+0</sup>) mice derived from the same crossings were used as additional controls. Genotyping was  
516 performed on mouse tail DNA using PALLD specific primers (sense:  
517 GCTTCGCTTCAAGGAGGACCTTCTG; reverse: TGTATATCATGTTGTGGTGTGTCAGCC),  
518 giving rise to a 348 band for the wild-type allele and a 418 band for the targeted allele (**Figure 2–**  
519 **figure supplement 1C**). The presence of Cre was verified using Cre specific primers (sense:  
520 ACGTTCACCGGCATCAACGT, reverse: CTGCATTACCGGTCGATGCA), giving rise to a 356  
521 bp band (**Figure 2–figure supplement 1C**). Inducible cardiac specific knockout (cPKOi) mice were  
522 generated by interbreeding of *Palld*<sup>fl/fl</sup> mice with *Myh6*-MerCreMer (MCM) transgenic mice (Sohal  
523 et al., 2001). Knockout of *Palld* in cPKOi (*Palld*<sup>fl/fl</sup>;MCM<sup>+0</sup>) male mice was induced at 7 weeks of  
524 age by intraperitoneal injection of TAM dissolved in sesame oil (30 mg/kg/day) for 5 days, a dose  
525 that does not produce toxicity in mice. TAM-treated *Palld*<sup>fl/fl</sup>;MCM<sup>0/0</sup> (*Palld*<sup>fl/fl</sup>) and  
526 *Palld*<sup>+/+</sup>;MCM<sup>+0</sup> (MCM<sup>+0</sup>) mice as well as *Palld*<sup>fl/fl</sup>;MCM<sup>+0</sup> mice not receiving TAM served as  
527 controls. Double knockout mice (cPKO/MKO dKO) for PALLD and MYPN were generated by  
528 interbreeding of *Palld*<sup>fl/fl</sup>;Cre<sup>+0</sup> mice with *Mypn*<sup>-/-</sup> mice, giving rise to *Mypn*<sup>-/-</sup>; *Palld*<sup>fl/fl</sup>;Cre<sup>+0</sup> mice

529 as cPKO/MKO dKO mice and *Mypn*<sup>-/-</sup>;*Palla*<sup>fl/fl</sup> mice control mice derived from the same crosses.  
530 All experiments were performed on male mice as females often develop a less severe cardiac  
531 phenotype due to the cardioprotective role of estrogen (Brower, Gardner, & Janicki, 2003; Du,  
532 2004).

533

#### 534 ***In vivo* cardiac physiology**

535 Mice anaesthetized by inhalation of 1% isoflurane were subjected to transthoracic  
536 echocardiography using a Vevo 2100 System (VisualSonics) and a 30 MHz probe as previously  
537 described (Tanaka et al., 1996). Transverse Aortic Constriction (TAC) was executed with a 27-  
538 gauge needle on 8-week-old cPKO and control mice anaesthetized by intraperitoneal injection of a  
539 mixture of ketamine (100 mg/kg) and xylazine (5 mg/kg) as described (Tanaka et al., 1996).  
540 Cardiac morphology and function were assessed by transthoracic echocardiography and the  
541 pressure gradient was evaluated by Doppler echocardiography. Only mice with a pressure gradient  
542 >70 mmHg were included in the analysis. Sham-operated mice were used as controls.

543

#### 544 **Human tissue**

545 Human myocardial tissue was collected from the apex of patients with ICM or DCM during left  
546 ventricular assist device (LVAD) implantation at Leipzig Heart Center in Germany following  
547 approval by the institutional review board (protocol #240/16-ek) and signed informed consent from  
548 the patients according to the principles of the Declaration of Helsinki. Myocardial tissue from five  
549 healthy donors rejected for transplantation was obtained from Careggi University Hospital,  
550 Florence, Italy (protocol #2006/0024713; renewed May 2009). All patients were Caucasian.  
551 Myocardial tissue was immediately snap frozen in liquid nitrogen and stored at -80°C for further  
552 processing.

553

#### 554 **DNA constructs**

555 Human *PALLD*, *MYPN*, *FHOD1*, and *ANKRD1* cDNAs, isolated by PCR using available constructs  
556 or a human cDNA library as a template, were cloned into pGBKT7 DNA-BD (Takara Bio),  
557 pGADT7-AD (Takara Bio), pFN21A HaloTag CMV Flexi (Promega), pNLF1-N [CMV Hygro]  
558 (Promega), and pNLF1-C [CMV Hygro] (Promega) vectors using restriction cloning or the In-  
559 Fusion HD Cloning Plus kit (Takara Bio) according to the manufacturer's instructions. Primer  
560 sequences are listed in *Supplementary file 1*. All constructs were confirmed by sequencing.

561

### 562 **Yeast two-hybrid assays**

563 Yeast two-hybrid screening was performed using the Matchmaker Gold Yeast Two-Hybrid System  
564 (Takara Bio) as described by the manufacturer (Young, Ferguson, Banuelos, & Gautel, 1998).  
565 Briefly, cDNA encoding the N-terminal region of human PALLD comprising Ig1 and Ig2 (amino  
566 acids 1-528) was cloned into the pGBKT7 DNA-BD bait vector (see *Supplementary Table S6*) and  
567 transformed into the yeast two-hybrid Gold yeast strain. The bait strain was combined with a Mate &  
568 Plate<sup>TM</sup> Human Heart library (Takara Bio) for 24 hours after which cells were plated on selective  
569 synthetic defined (SD) agar plates lacking tryptophan, leucine, histidine, and adenine and  
570 containing 120 ng/mL Aureobasidin A (SD/-Ade/-His/-Leu/-Trp/AbA). Colonies appearing after  
571 3-4 days of incubation at 30°C were restreaked onto SD/-Ade/-His/-Leu/-Trp/AbA/X- $\alpha$ -Gal plates  
572 containing 40  $\mu$ g/mL X- $\alpha$ -Gal, after which library plasmids from blue clones were isolated and  
573 sequenced. To confirm the interactions and narrow down the binding sites, pGBKT DNA-BD and  
574 pGADT7-AD vectors (Takara Bio) containing cDNAs encoding regions of MYPN, PALLD,  
575 CARP, and FHOD1 were cotransformed into the yeast two-hybrid Gold yeast strain and spotted on  
576 SD/-Ade/-His/-Leu/-Trp/AbA/X- $\alpha$ -Gal plates. Interaction was verified after 3-4 days of  
577 incubation at 30°C. Successful transformation of the two plasmids was confirmed by growth on  
578 SD/-Trp/-Leu plates. Possible autoactivation of bait and prey constructs was tested by  
579 cotransformation of the bait or prey vector with empty prey or bait vector, respectively.

580

581 **NanoBRET protein:protein interaction assay**

582 HEK293 cells cotransfected with pFN21A HaloTag CMV Flexi vector (Promega) expressing  
583 PALLD and pNLF1-N [CMV Hygro] or pNLF1-C [CMV Hygro] vector (Promega) expressing  
584 ANKRD1 were treated with 100 nM HaloTag NanoBRET 618 Ligand (Promega), whereafter  
585 signals were detected six hours later using a Synergy 4 instrument (BioTek). Results were analyzed  
586 using GraphPad Prism 9.0 software.

587

588 **RNA extraction and quantitative qRT-PCR**

589 LV RNA from mice or patients was extracted using PureZOL RNA isolation reagent (Bio-Rad  
590 Laboratories) according to the manufacturer's instructions. For qRT-PCR, first-strand cDNA  
591 synthesis was performed using the High Capacity cDNA Reverse Transcription kit (Thermo Fisher  
592 Scientific), whereafter qRT-PCR was performed in triplicate with custom designed oligos (see  
593 *Supplementary file 1*) using the SYBR Select Master Mix (Thermo Fisher Scientific). Relative  
594 expression analysis was performed using the  $\Delta\Delta C_t$  method using *Gapdh* (mice) or *HPRT* (human)  
595 for normalization.

596

597 **Isolation of adult ventricular CMCs**

598 For isolation of ventricular CMCs, hearts were cannulated and mounted on a Langendorff perfusion  
599 apparatus and perfused with Hank's Balanced Salt Solution (HBSS w/o  $\text{CaCl}_2$  and  $\text{MgCl}_2$ )  
600 supplemented with 1.2 mM  $\text{MgSO}_4$ , 15 mM glucose, 30 mM Taurine, and 1 mM  $\text{MgCl}_2$   
601 hexahydrate for 10 min at 37°C. Liberase blendzyme (Roche) (50  $\mu\text{g}/\text{ml}$ ) was then added to the  
602 solution and perfusion was continued for about 10 min until the heart became flaccid. Subsequently,  
603 the heart was removed and cells were dissociated and filtered through a 70  $\mu\text{m}$  filter after which  
604 BSA (Merck Life Science) was added to a final concentration of 4% to inactivate the enzyme. The  
605 cells were then allowed to settle and resuspended in fresh solution. For determination of CMC size,  
606 length, and width, pictures were taken on an Olympus BX53 Fluorescent microscope and analyzed



607 using ImageJ, version 2.1.0/1.53 C (NIH).

608

### 609 **CMC contractility and intracellular Ca<sup>2+</sup> transient measurements**

610 Simultaneous measurements of CMC contractility and Ca<sup>2+</sup> transients were carried out on an  
611 IonOptix system as previously described (Kondo et al., 2006). Briefly, CMCs loaded with 1 μM of  
612 the Ca<sup>2+</sup> probe Fura-2 AM (Thermo Fisher Scientific) were placed in a perfusion system and  
613 continuously perfused with perfusion buffer (HBSS without Ca<sup>2+</sup> and Mg<sup>2+</sup>, supplemented with 1.2  
614 mM MgSO<sub>4</sub>, 15 mM glucose, 30 mM taurine, and 1.0 mM MgCl<sub>2</sub>), containing 1.0 mM CaCl<sub>2</sub> at  
615 37°C at a constant flow rate of 1 ml/min. Loaded cells were paced (25 V) via two electrodes at  
616 frequencies of 0.5, 1.0 and 2.0 Hz, and sarcomere shortening and Fura-2 ratio (measured at 512 nm  
617 upon excitation at 340 and 380 nm) were simultaneously recorded on a Nikon Eclipse TE-2000S  
618 inverted fluorescence microscope with a 40x/1.3 N.A. objective and an attached CCD camera  
619 (MyoCam-S, IonOptix). Data acquisition and analysis were performed using Ion Wizard software,  
620 version 6.6.11 (IonOptix).

621

### 622 **Mechanical experiments in isolated myofibrils**

623 Mechanical data were collected at 15°C from small bundles of cardiac myofibrils from frozen  
624 ventricular strips of cPKOi and control mice as previously described (Kreutziger et al., 2011).  
625 Briefly, thin myofibril bundles (1-4 μm width, initial sarcomere length around 2.2 μm) were  
626 maximally Ca<sup>2+</sup>-activated (pCa 4.5) and fully relaxed (pCa 8.0) by fast solution switching. Maximal  
627 tension and the kinetics of force activation, and force relaxation were measured.

628

### 629 **Histology and immunofluorescence stainings**

630 For histology, mouse hearts were harvested, relaxed in 50 mM KCl in PBS, and fixed overnight in  
631 4% paraformaldehyde (PFA) in PBS. Subsequently, hearts were dehydrated, embedded in paraffin,  
632 and cut in 8 μm sections in the four-chamber view. Briefly, heart sections were stained with

633 hematoxylin and eosin or Picro Sirius Red and imaged using a VS20 DotSlide Digital Virtual  
634 Microscopy System (Olympus). The area of fibrosis in the LV was determined using *ad*  
635 *hoc* software automatically detecting Picro Sirius Red-stained areas based on RGB color  
636 segmentation (Grizzi et al., 2019). The sum of Picro Sirius Red-stained areas was expressed as a  
637 percentage of the LV area excluding unfilled and tissue-free spaces. For immunostaining of  
638 cryosectioned heart, the upper half of the heart was relaxed in 50 mM KCl in PBS, fixed for 15 min  
639 in 4% PBS, and subsequently saturated in 15% and 30% sucrose in PBS and frozen in OCT. 10  $\mu$ m  
640 sections were permeabilized and blocked for 1 hour in blocking solution containing 5% normal goat  
641 serum, 0.3% Triton X-100, and 50 mM glycine in PBS after which sections were incubated with  
642 primary antibodies in wash buffer (blocking buffer diluted 10 times in PBS) overnight at 4°C. After  
643 washing in wash buffer, sections were incubated at room temperature for 4 hours with rhodamine-  
644 labeled phalloidin (1:100, Merck Life Science) and/or Alexa-Fluor-488 or -568-conjugated IgG  
645 secondary antibodies (1:500, Thermo Fisher Scientific). The primary and secondary antibodies used  
646 are listed in the **Key Resources Table**. For immunostaining of adult CMCs, CMCs were fixed for 5  
647 min in 4% PFA in PBS and subsequently plated on laminin-coated 8-well Nunc™ Lab-Tek™  
648 Chamber Slides (Thermo Fisher Scientific). CMCs were permeabilized and blocked for 1 hour in  
649 blocking solution containing 5% normal goat serum and 0.2% Triton X-100 in PBS after which  
650 sections were incubated with primary antibodies (see **Key Resources Table**) in wash buffer  
651 (blocking buffer diluted 10 times in PBS) overnight at 4°C. After washing in PBS, CMCs were  
652 incubated at room temperature for 4 hours with rhodamine-labeled phalloidin (1:100, Merck Life  
653 Science) and/or Alexa-Fluor-488, -568, or -647-conjugated IgG secondary antibodies (1:500,  
654 Thermo Fisher Scientific). Conventional confocal microscopy was performed on a Leica SP8  
655 inverted confocal microscope with a 60X oil immersion lens, while STED microscopy was  
656 performed on a Leica SP8 STED3X SMD/FCS confocal microscope. Individual images (1024 x  
657 1024) were converted to tiff format and merged as pseudocolor RGB images using ImageJ (NIH).  
658

## 659 **Transmission Electron Microscopy (TEM)**

660 For TEM, hearts from cPKOi and control mice 2 and 6 months after TAM induction were excised  
661 and fixed in 3.5% glutaraldehyde in 0.15 M sodium cacodylate buffer, pH 7.4, as described  
662 (Boncompagni, Rossi, Micaroni, Beznoussenko, et al., 2009; Boncompagni, Rossi, Micaroni,  
663 Hamilton, et al., 2009). Small bundles of fibers teased from the papillary muscles were then post-  
664 fixed in 2% OsO<sub>4</sub> in NaCaCo buffer for 2 hours and block-stained in saturated uranyl acetate. After  
665 dehydration, specimens were embedded in an epoxy resin (Epon 812). Ultrathin sections (~50 nm)  
666 were cut using a Leica Ultracut R microtome (Leica Microsystem, Austria) with a Diatome  
667 diamond knife (DiATOME) and double-stained with uranyl acetate and lead citrate. Sections were  
668 viewed in a FP 505 Morgagni Series 268D electron microscope (FEI Company), equipped with a  
669 Megaview III digital camera and Soft Imaging System at 60 kV. The ICD fold amplitude was  
670 measured at several locations for each ICD on transmission electron micrographs of longitudinally  
671 sectioned papillary muscle at a magnification of 11.000x using the TEM Analysis Software. The  
672 ICD amplitude was defined as the width of the fold region as indicated in **Figure 5B**. Sarcomere  
673 and I-band lengths were determined on each micrograph in the proximity of the ICD to exclude  
674 micrographs presenting shrinkage of the specimens due to fixation and/or longitudinal distortion  
675 caused during the cutting of the section.

676

## 677 **SDS-PAGE and Western Blot analysis**

678 For Western blot analysis, LV tissue or adult CMCs were homogenized in RIPA buffer containing  
679 50 mM Tris pH 7.5, 150 mM NaCl, 0.5 mM DTT, 1 mM EDTA, 1% (v/v) SDS, 1% (v/v) Triton X-  
680 100, 1 mM PMSF, Roche Complete Protease Inhibitor Cocktail (Thermo Fisher Scientific), and  
681 Pierce<sup>TM</sup> Phosphatase Inhibitor Mini Tablets (Thermo Fisher Scientific) using a TissueLyser II  
682 (Qiagen). Protein concentration was determined using the Bio-Rad DC<sup>TM</sup> Protein Assay Kit (Bio-  
683 Rad Laboratories) according to the manufacturer's instructions. Western blot analyses were  
684 performed using the primary and secondary antibodies listed in the **Key Resources Table**. The

685 Immobilon™ Western Chemiluminescent HRP Substrate (Merck Life Science) was used and  
686 chemiluminescence was detected on a Chemidoc™ MP System (Bio-Rad Laboratories). Relative  
687 protein expression was determined by densitometry using Image Lab, version 6.1.0 software (Bio-  
688 Rad Laboratories). GAPDH was used for normalization.

689

### 690 **Titin isoform separation and phospho-titin analysis by Western blot analysis**

691 Separation of titin isoforms by SDS-PAGE and Western blot analyses were performed as previously  
692 described (Hamdani et al., 2013). Briefly, LV tissue was solubilized in 50 mM Tris-SDS buffer (pH  
693 6.8) containing 8 µg/mL leupeptin (Merck Life Science) and phosphatase inhibitor cocktail (Merck  
694 Life Science). SDS-PAGE was performed on 1.8% polyacrylamide/1% agarose gels run at 5 mA  
695 for 16 hours, whereafter titin bands were visualized by Coomassie blue staining. Titin isoform ratio  
696 was calculated as the densitometric value for titin N2BA over N2B. For determination of total  
697 phosphoserine/threonine phosphorylation and site-specific titin phosphorylation, Western blots  
698 were performed using anti-phosphoserine/threonine antibody (ECM Biosciences #PP2551; 1:500)  
699 as well as titin phosphosite-specific antibodies against pTTN-Ser3991 (N2B region; phosphorylated  
700 by PKA and ERK2; 1:500), pTTN-Ser4080 (N2B region; phosphorylated by PKG; 1:500), and  
701 pTTN-Ser12742 (PEVK region; phosphorylated by PKCα; 1:500) (Kotter et al., 2013).  
702 Densitometry was performed by normalization to total protein content as determined by Coomassie  
703 blue staining of each blot.

704

### 705 **Statistical analysis**

706 Sample sizes with adequate power to detect statistical differences between groups were determined  
707 based on our previous experience and gold standards in the field. The only exclusion criteria were  
708 technical failure or death/injury. Data are represented as mean ± standard error of the mean (SEM).  
709 Statistical comparisons between two groups were done using the unpaired Student's t-test.  
710 Comparisons between multiple groups were performed by one-way or two-way ANOVA with

711 Šídák's or Tukey's multiple comparisons test, as indicated. The Shapiro-Wilk test was performed to  
712 confirm normal distribution in each group and in residuals from a linear regression model, Bartlett's  
713 test to check for homogeneity of variance across groups, and Spearman's rank correlation test to  
714 confirm heteroscedasticity of residuals. The residuals diagnostic was performed with the DHARMA  
715 package, version 0.4.1 in R (R Core Team, 2021). When necessary, data were transformed to meet  
716 ANOVA assumptions. For the statistical analyses of echocardiographic parameters over time, a  
717 linear mixed model with Tukey's multiple comparisons test was used. The statistical analysis of  
718 qRT-PCR data from human biopsies, which did not show equal standard deviation, was performed  
719 by Brown-Forsythe and Welch ANOVA with Dunnett's T3 multiple comparisons test. The  
720 functional comparisons of sarcomere shortening and  $Ca^{2+}$  transients in CMCs were performed using  
721 two-level hierarchical testing with Bonferroni correction to eliminate the effects of variations both  
722 within cells and between mice (Sikkel et al., 2017).  $P < 0.05$  was considered statistically significant.  
723 Statistical analysis was performed using Prism 9 (GraphPad) or RStudio, version 1.2.5019 (RStudio  
724 Team, 2020) software.

725

## 726 **Acknowledgements**

727 We thank Dr. Ju Chen (University of California San Diego, La Jolla CA, USA), who provided  
728 advise and support for the generation of *Palla*<sup>f1/f1</sup> mice, and Marion von Frieling-Salewsky  
729 (University of Münster, Münster, Germany) for performing titin gel electrophoresis and Western  
730 blot analysis. This work was supported by the Italian Telethon foundation [GGP12282 to M.L.B];  
731 the Italian Ministry of Education, Universities and Research [MiUR PRIN 2010–2011;  
732 2010R8JK2X\_006 to MLB]; and the European Union's Horizon 2020 research and innovation  
733 program [SILICOFCM; 777204 to CP].

734

## 735 **Funding**

736 This work was supported by the Italian Telethon foundation [GGP12282 to M.L.B]; the Italian

737 Ministry of Education, Universities and Research [MiUR PRIN 2010–2011; 2010R8JK2X\_006 to  
738 MLB]; and the European Union’s Horizon 2020 research and innovation program [SILICOFCM;  
739 777204 to CP].

740

741 **Competing interests:** The authors declare that no competing interests exist.

742 **References**

743

744 Abel, E. D., Kaulbach, H. C., Tian, R., Hopkins, J. C., Duffy, J., Doetschman, T., Minnemann, T.,  
745 Boers, M. E., Hadro, E., Oberste-Berghaus, C., Quist, W., Lowell, B. B., Ingwall, J. S., &  
746 Kahn, B. B. (1999). Cardiac hypertrophy with preserved contractile function after selective  
747 deletion of GLUT4 from the heart. *J Clin Invest*, 104(12), 1703-1714. DOI:  
748 <https://doi.org/10.1172/JCI7605>

749 Al Haj, A., Mazur, A. J., Radaszkiewicz, K., Radaszkiewicz, T., Makowiecka, A., Stopschinski, B.  
750 E., Schonichen, A., Geyer, M., & Mannherz, H. G. (2015). Distribution of formins in  
751 cardiac muscle: FHOD1 is a component of intercalated discs and costameres. *Eur J Cell*  
752 *Biol*, 94(2), 101-113. DOI: <https://doi.org/10.1016/j.ejcb.2014.11.003>

753 Bagnall, R. D., Yeates, L., & Semsarian, C. (2010). Analysis of the Z-disc genes PDLIM3 and  
754 MYPN in patients with hypertrophic cardiomyopathy. *Int J Cardiol*, 145(3), 601-602. DOI:  
755 <https://doi.org/10.1016/j.ijcard.2010.08.004>

756 Bang, M. L., Bogomolovas, J., & Chen, J. (2022). Understanding the molecular basis of  
757 cardiomyopathy. *Am J Physiol Heart Circ Physiol*, 322(2), H181-h233. DOI:  
758 <https://doi.org/10.1152/ajpheart.00562.2021>

759 Bang, M. L., Gu, Y., Dalton, N. D., Peterson, K. L., Chien, K. R., & Chen, J. (2014). The muscle  
760 ankyrin repeat proteins CARP, Ankrd2, and DARP are not essential for normal cardiac  
761 development and function at basal conditions and in response to pressure overload. *PLoS*  
762 *One*, 9(4), e93638. DOI: <https://doi.org/10.1371/journal.pone.0093638>

763 Bang, M. L., Mudry, R. E., McElhinny, A. S., Trombitas, K., Geach, A. J., Yamasaki, R.,  
764 Sorimachi, H., Granzier, H., Gregorio, C. C., & Labeit, S. (2001). Myopalladin, a novel  
765 145-kilodalton sarcomeric protein with multiple roles in Z-disc and I-band protein  
766 assemblies. *J Cell Biol*, 153(2), 413-427. DOI: <https://doi.org/10.1083/jcb.153.2.413>

- 767 Bennett, P. M. (2012). From myofibril to membrane; the transitional junction at the intercalated  
768 disc. *Front Biosci (Landmark Ed)*, 17, 1035-1050. DOI: <https://doi.org/10.2741/3972>
- 769 Bogomolovas, J., Brohm, K., Celutkiene, J., Balciunaite, G., Bironaite, D., Bukelskiene, V.,  
770 Daunoravicus, D., Witt, C. C., Fielitz, J., Grabauskiene, V., & Labeit, S. (2015). Induction  
771 of Ankrd1 in Dilated Cardiomyopathy Correlates with the Heart Failure Progression.  
772 *Biomed Res Int*, 2015, 273936. DOI: <https://doi.org/10.1155/2015/273936>
- 773 Boncompagni, S., Rossi, A. E., Micaroni, M., Beznoussenko, G. V., Polishchuk, R. S., Dirksen, R.  
774 T., & Protasi, F. (2009). Mitochondria are linked to calcium stores in striated muscle by  
775 developmentally regulated tethering structures. *Molecular biology of the cell*, 20(3), 1058-  
776 1067. DOI: <https://doi.org/10.1091/mbc.e08-07-0783>
- 777 Boncompagni, S., Rossi, A. E., Micaroni, M., Hamilton, S. L., Dirksen, R. T., Franzini-Armstrong,  
778 C., & Protasi, F. (2009). Characterization and temporal development of cores in a mouse  
779 model of malignant hyperthermia. *Proceedings of the National Academy of Sciences*,  
780 106(51), 21996-22001. DOI: <https://doi.org/10.1073/pnas.0911496106>
- 781 Borrmann, C. M., Grund, C., Kuhn, C., Hofmann, I., Pieperhoff, S., & Franke, W. W. (2006). The  
782 area composita of adhering junctions connecting heart muscle cells of vertebrates. II.  
783 Colocalizations of desmosomal and fascia adhaerens molecules in the intercalated disk. *Eur*  
784 *J Cell Biol*, 85(6), 469-485. DOI: <https://doi.org/10.1016/j.ejcb.2006.02.009>
- 785 Boukhelifa, M., Moza, M., Johansson, T., Rachlin, A., Parast, M., Huttelmaier, S., Roy, P.,  
786 Jockusch, B. M., Carpen, O., Karlsson, R., & Otey, C. A. (2006). The proline-rich protein  
787 palladin is a binding partner for profilin. *FEBS J*, 273(1), 26-33. DOI:  
788 <https://doi.org/10.1111/j.1742-4658.2005.05036.x>
- 789 Boukhelifa, M., Parast, M. M., Bear, J. E., Gertler, F. B., & Otey, C. A. (2004). Palladin is a novel  
790 binding partner for Ena/VASP family members. *Cell Motil Cytoskeleton*, 58(1), 17-29. DOI:  
791 <https://doi.org/10.1002/cm.10173>



- 792 Brower, G. L., Gardner, J. D., & Janicki, J. S. (2003). Gender mediated cardiac protection from  
793 adverse ventricular remodeling is abolished by ovariectomy. *Mol Cell Biochem*, 251(1-2),  
794 89-95.
- 795 Chen, J. W., Zhou, B., Yu, Q. C., Shin, S. J., Jiao, K., Schneider, M. D., Baldwin, H. S., &  
796 Bergelson, J. M. (2006). Cardiomyocyte-specific deletion of the coxsackievirus and  
797 adenovirus receptor results in hyperplasia of the embryonic left ventricle and abnormalities  
798 of sinuatrial valves. *Circ Res*, 98(7), 923-930. DOI:  
799 <https://doi.org/10.1161/01.RES.0000218041.41932.e3>
- 800 Ding, Y., Yang, J., Chen, P., Lu, T., Jiao, K., Tester, D. J., Giudicessi, J. R., Jiang, K., Ackerman,  
801 M. J., Li, Y., Wang, D. W., Lee, H. C., Wang, D. W., & Xu, X. (2020). Knockout of  
802 SORBS2 Protein Disrupts the Structural Integrity of Intercalated Disc and Manifests  
803 Features of Arrhythmogenic Cardiomyopathy. *J Am Heart Assoc*, 9(17), e017055. DOI:  
804 <https://doi.org/10.1161/jaha.119.017055>
- 805 Dixon, R. D., Arneman, D. K., Rachlin, A. S., Sundaresan, N. R., Costello, M. J., Campbell, S. L.,  
806 & Otey, C. A. (2008). Palladin is an actin cross-linking protein that uses immunoglobulin-  
807 like domains to bind filamentous actin. *J Biol Chem*, 283(10), 6222-6231. DOI:  
808 <https://doi.org/10.1074/jbc.M707694200>
- 809 Du, X. J. (2004). Gender modulates cardiac phenotype development in genetically modified mice.  
810 *Cardiovasc Res*, 63(3), 510-519. DOI: <https://doi.org/10.1016/j.cardiores.2004.03.027>
- 811 Duboscq-Bidot, L., Xu, P., Charron, P., Neyroud, N., Dilanian, G., Millaire, A., Bors, V., Komajda,  
812 M., & Villard, E. (2008). Mutations in the Z-band protein myopalladin gene and idiopathic  
813 dilated cardiomyopathy. *Cardiovasc Res*, 77(1), 118-125. DOI:  
814 <https://doi.org/10.1093/cvr/cvm015>
- 815 Dwyer, J., Pluess, M., Iskratsch, T., Dos Remedios, C. G., & Ehler, E. (2014). The formin FHOD1  
816 in cardiomyocytes. *Anat Rec (Hoboken)*, 297(9), 1560-1570. DOI:  
817 <https://doi.org/10.1002/ar.22984>

- 818 El-Brolosy, M. A., & Stainier, D. Y. R. (2017). Genetic compensation: A phenomenon in search of  
819 mechanisms. *PLoS Genet*, *13*(7), e1006780. DOI:  
820 <https://doi.org/10.1371/journal.pgen.1006780>
- 821 Endlich, N., Schordan, E., Cohen, C. D., Kretzler, M., Lewko, B., Welsch, T., Kriz, W., Otey, C.  
822 A., & Endlich, K. (2009). Palladin is a dynamic actin-associated protein in podocytes.  
823 *Kidney Int*, *75*(2), 214-226. DOI: <https://doi.org/10.1038/ki.2008.486>
- 824 Filomena, M. C., Yamamoto, D. L., Caremani, M., Kadarla, V. K., Mastrototaro, G., Serio, S.,  
825 Vydyanath, A., Mutarelli, M., Garofalo, A., Pertici, I., Knoll, R., Nigro, V., Luther, P. K.,  
826 Lieber, R. L., Beck, M. R., Linari, M., & Bang, M. L. (2020). Myopalladin promotes muscle  
827 growth through modulation of the serum response factor pathway. *J Cachexia Sarcopenia*  
828 *Muscle*, *11*(1), 169-194. DOI: <https://doi.org/10.1002/jcsm.12486>
- 829 Filomena, M. C., Yamamoto, D. L., Carullo, P., Medvedev, R., Ghisleni, A., Piroddi, N., Scellini,  
830 B., Crispino, R., D'Autilia, F., Zhang, J., Felicetta, A., Nemska, S., Serio, S., Tesi, C.,  
831 Catalucci, D., Linke, W. A., Polishchuk, R., Poggesi, C., Gautel, M., & Bang, M. L. (2021).  
832 Myopalladin knockout mice develop cardiac dilation and show a maladaptive response to  
833 mechanical pressure overload. *Elife*, *10*. DOI: <https://doi.org/10.7554/eLife.58313>
- 834 Franke, W. W., Borrmann, C. M., Grund, C., & Pieperhoff, S. (2006). The area composita of  
835 adhering junctions connecting heart muscle cells of vertebrates. I. Molecular definition in  
836 intercalated disks of cardiomyocytes by immunoelectron microscopy of desmosomal  
837 proteins. *Eur J Cell Biol*, *85*(2), 69-82. DOI: <https://doi.org/10.1016/j.ejcb.2005.11.003>
- 838 Gilam, A., Conde, J., Weissglas-Volkov, D., Oliva, N., Friedman, E., Artzi, N., & Shomron, N.  
839 (2016). Local microRNA delivery targets Palladin and prevents metastatic breast cancer.  
840 *Nat Commun*, *7*, 12868. DOI: <https://doi.org/10.1038/ncomms12868>
- 841 Goicoechea, S., Arneman, D., Disanza, A., Garcia-Mata, R., Scita, G., & Otey, C. A. (2006).  
842 Palladin binds to Eps8 and enhances the formation of dorsal ruffles and podosomes in

- 843 vascular smooth muscle cells. *J Cell Sci*, 119(Pt 16), 3316-3324. DOI:  
844 <https://doi.org/10.1242/jcs.03076>
- 845 Goicoechea, S. M., Bednarski, B., Garcia-Mata, R., Prentice-Dunn, H., Kim, H. J., & Otey, C. A.  
846 (2009). Palladin contributes to invasive motility in human breast cancer cells. *Oncogene*,  
847 28(4), 587-598. DOI: <https://doi.org/10.1038/onc.2008.408>
- 848 Goicoechea, S. M., Bednarski, B., Stack, C., Cowan, D. W., Volmar, K., Thorne, L., Cukierman, E.,  
849 Rustgi, A. K., Brentnall, T., Hwang, R. F., McCulloch, C. A., Yeh, J. J., Bentrem, D. J.,  
850 Hochwald, S. N., Hingorani, S. R., Kim, H. J., & Otey, C. A. (2010). Isoform-specific  
851 upregulation of palladin in human and murine pancreas tumors. *PLoS One*, 5(4), e10347.  
852 DOI: <https://doi.org/10.1371/journal.pone.0010347>
- 853 Grizzi, F., Fiorino, S., Qehajaj, D., Fornelli, A., Russo, C., de Biase, D., Masetti, M., Mastrangelo,  
854 L., Zanello, M., Lombardi, R., Domanico, A., Accogli, E., Tura, A., Mirandola, L., Chiriva-  
855 Internati, M., Bresalier, R. S., Jovine, E., Leandri, P., & Di Tommaso, L. (2019). Computer-  
856 aided assessment of the extra-cellular matrix during pancreatic carcinogenesis: a pilot study.  
857 *J Transl Med*, 17(1), 61. DOI: <https://doi.org/10.1186/s12967-019-1817-3>
- 858 Gurung, R., Yadav, R., Brungardt, J. G., Orlova, A., Egelman, E. H., & Beck, M. R. (2016). Actin  
859 polymerization is stimulated by actin cross-linking protein palladin. *Biochem J*, 473(4), 383-  
860 396. DOI: <https://doi.org/10.1042/BJ20151050>
- 861 Hamdani, N., Krysiak, J., Kreusser, M. M., Neef, S., Dos Remedios, C. G., Maier, L. S., Kruger,  
862 M., Backs, J., & Linke, W. A. (2013). Crucial role for Ca<sup>2+</sup>/calmodulin-dependent protein  
863 kinase-II in regulating diastolic stress of normal and failing hearts via titin phosphorylation.  
864 *Circ Res*, 112(4), 664-674. DOI: <https://doi.org/10.1161/CIRCRESAHA.111.300105>
- 865 Hirschy, A., Croquelois, A., Perriard, E., Schoenauer, R., Agarkova, I., Hoerstrup, S. P., Taketo, M.  
866 M., Pedrazzini, T., Perriard, J. C., & Ehler, E. (2010). Stabilised beta-catenin in postnatal  
867 ventricular myocardium leads to dilated cardiomyopathy and premature death. *Basic Res*  
868 *Cardiol*, 105(5), 597-608. DOI: <https://doi.org/10.1007/s00395-010-0101-8>

- 869 Jin, L. (2011). The actin associated protein palladin in smooth muscle and in the development of  
870 diseases of the cardiovascular and in cancer. *J Muscle Res Cell Motil*, 32(1), 7-17. DOI:  
871 <https://doi.org/10.1007/s10974-011-9246-9>
- 872 Jin, L., Gan, Q., Zieba, B. J., Goicoechea, S. M., Owens, G. K., Otey, C. A., & Somlyo, A. V.  
873 (2010). The actin associated protein palladin is important for the early smooth muscle cell  
874 differentiation. *PLoS One*, 5(9), e12823. DOI: <https://doi.org/10.1371/journal.pone.0012823>
- 875 Jin, L., Kern, M. J., Otey, C. A., Wamhoff, B. R., & Somlyo, A. V. (2007). Angiotensin II, focal  
876 adhesion kinase, and PRX1 enhance smooth muscle expression of lipoma preferred partner  
877 and its newly identified binding partner palladin to promote cell migration. *Circ Res*, 100(6),  
878 817-825. DOI: <https://doi.org/10.1161/01.RES.0000261351.54147.de>
- 879 Jurmeister, S., Baumann, M., Balwierz, A., Keklikoglou, I., Ward, A., Uhlmann, S., Zhang, J. D.,  
880 Wiemann, S., & Sahin, Ö. (2012). MicroRNA-200c represses migration and invasion of  
881 breast cancer cells by targeting actin-regulatory proteins FHOD1 and PPM1F. *Mol Cell*  
882 *Biol*, 32(3), 633-651. DOI: <https://doi.org/10.1128/mcb.06212-11>
- 883 Kanki, H., Suzuki, H., & Itohara, S. (2006). High-efficiency CAG-FLPe deleter mice in C57BL/6J  
884 background. *Experimental animals*, 55(2), 137-141. DOI:  
885 <https://doi.org/10.1538/expanim.55.137>.
- 886 Kempton, A., Cefalu, M., Justice, C., Baich, T., Derbala, M., Canan, B., Janssen, P. M. L., Mohler,  
887 P. J., & Smith, S. A. (2018). Altered regulation of cardiac ankyrin repeat protein in heart  
888 failure. *Heliyon*, 4(1), e00514. DOI: <https://doi.org/10.1016/j.heliyon.2018.e00514>
- 889 Kondo, R. P., Dederko, D. A., Teutsch, C., Chrast, J., Catalucci, D., Chien, K. R., & Giles, W. R.  
890 (2006). Comparison of contraction and calcium handling between right and left ventricular  
891 myocytes from adult mouse heart: a role for repolarization waveform. *J Physiol*, 571(Pt 1),  
892 131-146. DOI: <https://doi.org/10.1113/jphysiol.2005.101428>

- 893 König, N., Raynaud, F., Feane, H., Durand, M., Mestre-Francès, N., Rossel, M., Ouali, A., &  
894 Benyamin, Y. (2003). Calpain 3 is expressed in astrocytes of rat and *Microcebus* brain. *J*  
895 *Chem Neuroanat*, 25(2), 129-136. DOI: [https://doi.org/10.1016/s0891-0618\(02\)00102-3](https://doi.org/10.1016/s0891-0618(02)00102-3)
- 896 Kostetskii, I., Li, J., Xiong, Y., Zhou, R., Ferrari, V. A., Patel, V. V., Molkentin, J. D., & Radice, G.  
897 L. (2005). Induced deletion of the N-cadherin gene in the heart leads to dissolution of the  
898 intercalated disc structure. *Circ Res*, 96(3), 346-354. DOI:  
899 <https://doi.org/10.1161/01.RES.0000156274.72390.2c>
- 900 Kotter, S., Gout, L., Von Frieling-Salewsky, M., Muller, A. E., Helling, S., Marcus, K., Dos  
901 Remedios, C., Linke, W. A., & Kruger, M. (2013). Differential changes in titin domain  
902 phosphorylation increase myofilament stiffness in failing human hearts. *Cardiovasc Res*,  
903 99(4), 648-656. DOI: <https://doi.org/10.1093/cvr/cvt144>
- 904 Kreutziger, K. L., Piroddi, N., McMichael, J. T., Tesi, C., Poggesi, C., & Regnier, M. (2011).  
905 Calcium binding kinetics of troponin C strongly modulate cooperative activation and tension  
906 kinetics in cardiac muscle. *J Mol Cell Cardiol*, 50(1), 165-174. DOI:  
907 <https://doi.org/10.1016/j.yjmcc.2010.10.025>
- 908 Lai, C. F., Bai, S., Uthgenannt, B. A., Halstead, L. R., McLoughlin, P., Schafer, B. W., Chu, P. H.,  
909 Chen, J., Otey, C. A., Cao, X., & Cheng, S. L. (2006). Four and half lim protein 2 (FHL2)  
910 stimulates osteoblast differentiation. *J Bone Miner Res*, 21(1), 17-28. DOI:  
911 <https://doi.org/10.1359/JBMR.050915>
- 912 Laure, L., Daniele, N., Suel, L., Marchand, S., Aubert, S., Bourg, N., Roudaut, C., Duguez, S.,  
913 Bartoli, M., & Richard, I. (2010). A new pathway encompassing calpain 3 and its newly  
914 identified substrate cardiac ankyrin repeat protein is involved in the regulation of the nuclear  
915 factor-kappaB pathway in skeletal muscle. *FEBS J*, 277(20), 4322-4337. DOI:  
916 <https://doi.org/10.1111/j.1742-4658.2010.07820.x>
- 917 Li, C., Liu, F., Liu, S., Pan, H., Du, H., Huang, J., Xie, Y., Li, Y., Zhao, R., & Wei, Y. (2020).  
918 Elevated myocardial SORBS2 and the underlying implications in left ventricular

- 919 noncompaction cardiomyopathy. *EBioMedicine*, 53, 102695. DOI:  
920 <https://doi.org/10.1016/j.ebiom.2020.102695>
- 921 Li, J., Goossens, S., van Hengel, J., Gao, E., Cheng, L., Tyberghein, K., Shang, X., De Rycke, R.,  
922 van Roy, F., & Radice, G. L. (2012). Loss of  $\alpha$ T-catenin alters the hybrid adhering junctions  
923 in the heart and leads to dilated cardiomyopathy and ventricular arrhythmia following acute  
924 ischemia. *J Cell Sci*, 125(Pt 4), 1058-1067. DOI: <https://doi.org/10.1242/jcs.098640>
- 925 Liotta, L., Lange, S., Maurer, H. C., Olive, K. P., Braren, R., Pfarr, N., Muckenhuber, A.,  
926 Jesinghaus, M., Weichert, W., Steiger, K., Burger, S., Friess, H., Schmid, R. M., Alguet, H.,  
927 Jost, P., Ramser, J., Fischer, C., Quante, A. S., Reichert, M., & Quante, M. (2021). PALLD  
928 mutation in a European family conveys a stromal predisposition for familial pancreatic  
929 cancer. *JCI Insight*. DOI: <https://doi.org/10.1172/jci.insight.141532>
- 930 Loescher, C. M., Hobbach, A. J., & Linke, W. A. (2021). Titin (TTN): from molecule to  
931 modifications, mechanics and medical significance. *Cardiovasc Res*. DOI:  
932 <https://doi.org/10.1093/cvr/cvab328>
- 933 Luo, H., Liu, X., Wang, F., Huang, Q., Shen, S., Wang, L., Xu, G., Sun, X., Kong, H., Gu, M.,  
934 Chen, S., Chen, Z., & Wang, Z. (2005). Disruption of palladin results in neural tube closure  
935 defects in mice. *Mol Cell Neurosci*, 29(4), 507-515. DOI:  
936 <https://doi.org/10.1016/j.mcn.2004.12.002>
- 937 Madrid, R., Gasteier, J. E., Bouchet, J., Schröder, S., Geyer, M., Benichou, S., & Fackler, O. T.  
938 (2005). Oligomerization of the diaphanous-related formin FHOD1 requires a coiled-coil  
939 motif critical for its cytoskeletal and transcriptional activities. *FEBS Lett*, 579(2), 441-448.  
940 DOI: <https://doi.org/10.1016/j.febslet.2004.12.009>
- 941 Mastrototaro, G., Liang, X., Li, X., Carullo, P., Piroddi, N., Tesi, C., Gu, Y., Dalton, N. D.,  
942 Peterson, K. L., Poggesi, C., Sheikh, F., Chen, J., & Bang, M. L. (2015). Nebulette knockout  
943 mice have normal cardiac function, but show Z-line widening and up-regulation of cardiac  
944 stress markers. *Cardiovasc Res*, 107(2), 216-225. DOI: <https://doi.org/10.1093/cvr/cvv156>

- 945 Meyer, T., Ruppert, V., Ackermann, S., Richter, A., Perrot, A., Sperling, S. R., Posch, M. G.,  
946 Maisch, B., & Pankuweit, S. (2013). Novel mutations in the sarcomeric protein myopalladin  
947 in patients with dilated cardiomyopathy. *Eur J Hum Genet*, 21(3), 294-300. DOI:  
948 <https://doi.org/10.1038/ejhg.2012.173>
- 949 Miller, M. K., Bang, M. L., Witt, C. C., Labeit, D., Trombitas, C., Watanabe, K., Granzier, H.,  
950 McElhinny, A. S., Gregorio, C. C., & Labeit, S. (2003). The muscle ankyrin repeat proteins:  
951 CARP, ankrd2/Arpp and DARP as a family of titin filament-based stress response  
952 molecules. *J Mol Biol*, 333(5), 951-964. DOI: <https://doi.org/10.1016/j.jmb.2003.09.012>
- 953 Mykkanen, O. M., Gronholm, M., Ronty, M., Lalowski, M., Salmikangas, P., Suila, H., & Carpen,  
954 O. (2001). Characterization of human palladin, a microfilament-associated protein. *Mol Biol*  
955 *Cell*, 12(10), 3060-3073. DOI: <https://doi.org/10.1091/mbc.12.10.3060>
- 956 Nagueh, S. F., Shah, G., Wu, Y., Torre-Amione, G., King, N. M., Lahmers, S., Witt, C. C., Becker,  
957 K., Labeit, S., & Granzier, H. L. (2004). Altered titin expression, myocardial stiffness, and  
958 left ventricular function in patients with dilated cardiomyopathy. *Circulation*, 110(2), 155-  
959 162. DOI: <https://doi.org/10.1161/01.CIR.0000135591.37759.AF>
- 960 Norgett, E. E., Hatsell, S. J., Carvajal-Huerta, L., Cabezas, J. C., Common, J., Purkis, P. E.,  
961 Whittock, N., Leigh, I. M., Stevens, H. P., & Kelsell, D. P. (2000). Recessive mutation in  
962 desmoplakin disrupts desmoplakin-intermediate filament interactions and causes dilated  
963 cardiomyopathy, woolly hair and keratoderma. *Hum Mol Genet*, 9(18), 2761-2766. DOI:  
964 <https://doi.org/10.1093/hmg/9.18.2761>
- 965 Otey, C. A., Dixon, R., Stack, C., & Goicoechea, S. M. (2009). Cytoplasmic Ig-domain proteins:  
966 cytoskeletal regulators with a role in human disease. *Cell Motil Cytoskeleton*, 66(8), 618-  
967 634. DOI: <https://doi.org/10.1002/cm.20385>
- 968 Parast, M. M., & Otey, C. A. (2000). Characterization of palladin, a novel protein localized to stress  
969 fibers and cell adhesions. *J Cell Biol*, 150(3), 643-656. DOI:  
970 <https://doi.org/10.1083/jcb.150.3.643>

- 971 Pashmforoush, M., Pomiès, P., Peterson, K. L., Kubalak, S., Ross, J., Jr., Hefti, A., Aebi, U.,  
972 Beckerle, M. C., & Chien, K. R. (2001). Adult mice deficient in actinin-associated LIM-  
973 domain protein reveal a developmental pathway for right ventricular cardiomyopathy. *Nat*  
974 *Med*, 7(5), 591-597. DOI: <https://doi.org/10.1038/87920>
- 975 Pogue-Geile, K. L., Chen, R., Bronner, M. P., Crnogorac-Jurcevic, T., Moyes, K. W., Downen, S.,  
976 Otey, C. A., Crispin, D. A., George, R. D., Whitcomb, D. C., & Brentnall, T. A. (2006).  
977 Palladin mutation causes familial pancreatic cancer and suggests a new cancer mechanism.  
978 *PLoS Med*, 3(12), e516. DOI: <https://doi.org/10.1371/journal.pmed.0030516>
- 979 Purevjav, E., Arimura, T., Augustin, S., Huby, A. C., Takagi, K., Nunoda, S., Kearney, D. L.,  
980 Taylor, M. D., Terasaki, F., Bos, J. M., Ommen, S. R., Shibata, H., Takahashi, M., Itoh-  
981 Satoh, M., McKenna, W. J., Murphy, R. T., Labeit, S., Yamanaka, Y., Machida, N., Park, J.  
982 E., Alexander, P. M., Weintraub, R. G., Kitaura, Y., Ackerman, M. J., Kimura, A., &  
983 Towbin, J. A. (2012). Molecular Basis for Clinical Heterogeneity in Inherited  
984 Cardiomyopathies Due to Myopalladin Mutations. *Hum Mol Genet*, 21(9), 2039-2053. DOI:  
985 <https://doi.org/10.1093/hmg/dds022>
- 986 R Core Team (2021). R: A language and environment for statistical computing. *R Foundation for*  
987 *Statistical Computing, Vienna, Austria*. URL: <https://www.R-project.org/>
- 988 Rachlin, A. S., & Otey, C. A. (2006). Identification of palladin isoforms and characterization of an  
989 isoform-specific interaction between Lasp-1 and palladin. *J Cell Sci*, 119(Pt 6), 995-1004.  
990 DOI: <https://doi.org/10.1242/jcs.02825>
- 991 Ronty, M., Taivainen, A., Heiska, L., Otey, C., Ehler, E., Song, W. K., & Carpen, O. (2007).  
992 Palladin interacts with SH3 domains of SPIN90 and Src and is required for Src-induced  
993 cytoskeletal remodeling. *Exp Cell Res*, 313(12), 2575-2585. DOI:  
994 <https://doi.org/10.1016/j.yexcr.2007.04.030>



- 995 Ronty, M., Taivainen, A., Moza, M., Kruh, G. D., Ehler, E., & Carpen, O. (2005). Involvement of  
996 palladin and alpha-actinin in targeting of the Abl/Arg kinase adaptor ArgBP2 to the actin  
997 cytoskeleton. *Exp Cell Res*, *310*(1), 88-98. DOI: <https://doi.org/10.1016/j.yexcr.2005.06.026>
- 998 Ronty, M., Taivainen, A., Moza, M., Otey, C. A., & Carpen, O. (2004). Molecular analysis of the  
999 interaction between palladin and alpha-actinin. *FEBS Lett*, *566*(1-3), 30-34. DOI:  
1000 <https://doi.org/10.1016/j.febslet.2004.04.006>
- 1001 Rstudio Team (2020). RStudio: Integrated Development for R. *RStudio, PBC, Boston, MA, USA*.  
1002 URL: <http://www.rstudio.com/>
- 1003 Sanematsu, F., Kanai, A., Ushijima, T., Shiraishi, A., Abe, T., Kage, Y., Sumimoto, H., & Takeya,  
1004 R. (2019). Fhod1, an actin-organizing formin family protein, is dispensable for cardiac  
1005 development and function in mice. *Cytoskeleton (Hoboken)*, *76*(2), 219-229. DOI:  
1006 <https://doi.org/10.1002/cm.21523>
- 1007 Schönichen, A., Mannherz, H. G., Behrmann, E., Mazur, A. J., Kühn, S., Silván, U.,  
1008 Schoenenberger, C. A., Fackler, O. T., Raunser, S., Dehmelt, L., & Geyer, M. (2013).  
1009 FHOD1 is a combined actin filament capping and bundling factor that selectively associates  
1010 with actin arcs and stress fibers. *J Cell Sci*, *126*(Pt 8), 1891-1901. DOI:  
1011 <https://doi.org/10.1242/jcs.126706>
- 1012 Sheikh, F., Chen, Y., Liang, X., Hirschy, A., Stenbit, A. E., Gu, Y., Dalton, N. D., Yajima, T., Lu,  
1013 Y., Knowlton, K. U., Peterson, K. L., Perriard, J. C., & Chen, J. (2006). alpha-E-catenin  
1014 inactivation disrupts the cardiomyocyte adherens junction, resulting in cardiomyopathy and  
1015 susceptibility to wall rupture. *Circulation*, *114*(10), 1046-1055. DOI:  
1016 <https://doi.org/10.1161/circulationaha.106.634469>
- 1017 Sikkil, M. B., Francis, D. P., Howard, J., Gordon, F., Rowlands, C., Peters, N. S., Lyon, A. R.,  
1018 Harding, S. E., & MacLeod, K. T. (2017). Hierarchical statistical techniques are necessary  
1019 to draw reliable conclusions from analysis of isolated cardiomyocyte studies. *Cardiovasc*  
1020 *Res*, *113*(14), 1743-1752. DOI: <https://doi.org/10.1093/cvr/cvx151>

- 1021 Slater, E., Amrillaeva, V., Fendrich, V., Bartsch, D., Earl, J., Vitone, L. J., Neoptolemos, J. P., &  
1022 Greenhalf, W. (2007). Palladin mutation causes familial pancreatic cancer: absence in  
1023 European families. *PLoS Med*, 4(4), e164. DOI:  
1024 <https://doi.org/10.1371/journal.pmed.0040164>
- 1025 Sohal, D. S., Nghiem, M., Crackower, M. A., Witt, S. A., Kimball, T. R., Tymitz, K. M., Penninger,  
1026 J. M., & Molkentin, J. D. (2001). Temporally regulated and tissue-specific gene  
1027 manipulations in the adult and embryonic heart using a tamoxifen-inducible Cre protein.  
1028 *Circ Res*, 89(1), 20-25. DOI: <https://doi.org/10.1161/hh1301.092687>
- 1029 Sweet, M. E., Cocciolo, A., Slavov, D., Jones, K. L., Sweet, J. R., Graw, S. L., Reece, T. B.,  
1030 Ambardekar, A. V., Bristow, M. R., Mestroni, L., & Taylor, M. R. G. (2018). Transcriptome  
1031 analysis of human heart failure reveals dysregulated cell adhesion in dilated cardiomyopathy  
1032 and activated immune pathways in ischemic heart failure. *BMC Genomics*, 19(1), 812. DOI:  
1033 <https://doi.org/10.1186/s12864-018-5213-9>
- 1034 Takeya, R., & Sumimoto, H. (2003). Fhos, a mammalian formin, directly binds to F-actin via a  
1035 region N-terminal to the FH1 domain and forms a homotypic complex via the FH2 domain  
1036 to promote actin fiber formation. *J Cell Sci*, 116(Pt 22), 4567-4575. DOI:  
1037 <https://doi.org/10.1242/jcs.00769>
- 1038 Tanaka, N., Dalton, N., Mao, L., Rockman, H. A., Peterson, K. L., Gottshall, K. R., Hunter, J. J.,  
1039 Chien, K. R., & Ross, J. (1996). Transthoracic echocardiography in models of cardiac  
1040 disease in the mouse. *Circulation*, 94(5), 1109-1117. DOI:  
1041 <https://doi.org/10.1161/01.cir.94.5.1109>
- 1042 Vermij, S. H., Abriel, H., & van Veen, T. A. (2017). Refining the molecular organization of the  
1043 cardiac intercalated disc. *Cardiovasc Res*, 113(3), 259-275. DOI:  
1044 <https://doi.org/10.1093/cvr/cvw259>
- 1045 von Nandelstadh, P., Gucciardo, E., Lohi, J., Li, R., Sugiyama, N., Carpen, O., & Lehti, K. (2014).  
1046 Actin-associated protein palladin promotes tumor cell invasion by linking extracellular

- 1047 matrix degradation to cell cytoskeleton. *Mol Biol Cell*, 25(17), 2556-2570. DOI:  
1048 <https://doi.org/10.1091/mbc.E13-11-0667>
- 1049 von Nandelstadh, P., Ismail, M., Gardin, C., Suila, H., Zara, I., Belgrano, A., Valle, G., Carpen, O.,  
1050 & Faulkner, G. (2009). A class III PDZ binding motif in the myotilin and FATZ families  
1051 binds enigma family proteins: a common link for Z-disc myopathies. *Mol Cell Biol*, 29(3),  
1052 822-834. DOI: <https://doi.org/10.1128/MCB.01454-08>
- 1053 Wang, H. V., & Moser, M. (2008). Comparative expression analysis of the murine palladin  
1054 isoforms. *Dev Dyn*, 237(11), 3342-3351. DOI: <https://doi.org/10.1002/dvdy.21755>
- 1055 Wilson, A. J., Schoenauer, R., Ehler, E., Agarkova, I., & Bennett, P. M. (2014). Cardiomyocyte  
1056 growth and sarcomerogenesis at the intercalated disc. *Cell Mol Life Sci*, 71(1), 165-181.  
1057 DOI: <https://doi.org/10.1007/s00018-013-1374-5>
- 1058 Yamamoto, D. L., Vitiello, C., Zhang, J., Gokhin, D. S., Castaldi, A., Coulis, G., Piaser, F.,  
1059 Filomena, M. C., Eggenhuizen, P. J., Kunderfranco, P., Camerini, S., Takano, K., Endo, T.,  
1060 Crescenzi, M., Luther, P. K., Lieber, R. L., Chen, J., & Bang, M. L. (2013). The nebulin  
1061 SH3 domain is dispensable for normal skeletal muscle structure but is required for effective  
1062 active load bearing in mouse. *J Cell Sci*, 126(Pt 23), 5477-5489. DOI:  
1063 <https://doi.org/10.1242/jcs.137026>
- 1064 Yang, K. C., Yamada, K. A., Patel, A. Y., Topkara, V. K., George, I., Cheema, F. H., Ewald, G. A.,  
1065 Mann, D. L., & Nerbonne, J. M. (2014). Deep RNA sequencing reveals dynamic regulation  
1066 of myocardial noncoding RNAs in failing human heart and remodeling with mechanical  
1067 circulatory support. *Circulation*, 129(9), 1009-1021. DOI:  
1068 <https://doi.org/10.1161/CIRCULATIONAHA.113.003863>
- 1069 Young, P., Ferguson, C., Banuelos, S., & Gautel, M. (1998). Molecular structure of the sarcomeric  
1070 Z-disk: two types of titin interactions lead to an asymmetrical sorting of alpha-actinin. *Embo*  
1071 *J*, 17(6), 1614-1624. DOI: <https://doi.org/10.1093/emboj/17.6.1614>

- 1072 Zemljic-Harpf, A. E., Miller, J. C., Henderson, S. A., Wright, A. T., Manso, A. M., Elsherif, L.,  
1073 Dalton, N. D., Thor, A. K., Perkins, G. A., McCulloch, A. D., & Ross, R. S. (2007).  
1074 Cardiac-myocyte-specific excision of the vinculin gene disrupts cellular junctions, causing  
1075 sudden death or dilated cardiomyopathy. *Mol Cell Biol*, 27(21), 7522-7537. DOI:  
1076 <https://doi.org/10.1128/MCB.00728-07>
- 1077 Zhou, Q., Chu, P. H., Huang, C., Cheng, C. F., Martone, M. E., Knoll, G., Shelton, G. D., Evans, S.,  
1078 & Chen, J. (2001). Ablation of Cypher, a PDZ-LIM domain Z-line protein, causes a severe  
1079 form of congenital myopathy. *J Cell Biol*, 155(4), 605-612. DOI:  
1080 <https://doi.org/10.1083/jcb.200107092>
- 1081 Zolk, O., Frohme, M., Maurer, A., Kluxen, F. W., Hentsch, B., Zubakov, D., Hoheisel, J. D.,  
1082 Zucker, I. H., Pepe, S., & Eschenhagen, T. (2002). Cardiac ankyrin repeat protein, a  
1083 negative regulator of cardiac gene expression, is augmented in human heart failure. *Biochem*  
1084 *Biophys Res Commun*, 293(5), 1377-1382. DOI: [https://doi.org/10.1016/S0006-](https://doi.org/10.1016/S0006-291X(02)00387-X)  
1085 [291X\(02\)00387-X](https://doi.org/10.1016/S0006-291X(02)00387-X)
- 1086

1087 **Table**

1088

1089 **Table 1.** Tension generation and relaxation in ventricular myofibrils from inducible cardiomyocyte-specific  
 1090 palladin knockout (cPKOi) mice and control male mice 2 months after tamoxifen (TAM) induction.

| Myofibril batch                                             | Resting conditions |                        | Tension generation     |                    | Relaxation       |                                        |                                        |
|-------------------------------------------------------------|--------------------|------------------------|------------------------|--------------------|------------------|----------------------------------------|----------------------------------------|
|                                                             | SL                 | RT                     | P <sub>0</sub>         | k <sub>ACT</sub>   | Slow Phase       | Fast Phase                             |                                        |
|                                                             | (μm)               | (mN mm <sup>-2</sup> ) | (mN mm <sup>-2</sup> ) | (s <sup>-1</sup> ) | Duration<br>(ms) | k <sub>REL</sub><br>(s <sup>-1</sup> ) | k <sub>REL</sub><br>(s <sup>-1</sup> ) |
| <b><i>Palld</i><sup>fl/fl</sup>; TAM</b>                    | 2.13±0.02<br>(30)  | 8.65±1.03<br>(30)      | 138±7<br>(30)          | 4.98±0.30<br>(30)  | 78.2±3.9<br>(25) | 2.02±0.22<br>(25)                      | 20.8±2.2<br>(29)                       |
| <b>MRM<sup>+/-0</sup> TAM</b>                               | 2.13±0.02<br>(33)  | 9.01±1.02<br>(33)      | 129±9<br>(33)          | 4.91±0.28<br>(31)  | 74.7±3.5<br>(27) | 1.54±0.19<br>(27)                      | 28.4±2.8<br>(27)                       |
| <b><i>Palld</i><sup>fl/fl</sup>; MRM<sup>+/-0</sup> TAM</b> | 2.14±0.02<br>(23)  | 9.67±1.81<br>(23)      | <b>111±8*</b><br>(23)  | 4.83±0.43<br>(23)  | 86.5±4.8<br>(22) | 1.86±0.19<br>(22)                      | 21.5±1.2<br>(22)                       |

1091 All data are represented as mean ± standard error of the mean (SEM). Numbers in parentheses are number of  
 1092 myofibrils. SL, sarcomere length, RT, resting tension, P<sub>0</sub>, maximum isometric tension; k<sub>ACT</sub>, rate constant of  
 1093 tension rise following step-wise pCa decrease (8.0→4.5) by fast solution switching. Full tension relaxation  
 1094 kinetics were characterized by the duration and rate constant of tension decay of the isometric slow  
 1095 relaxation phase (slow k<sub>REL</sub>) and the rate constant of the fast relaxation phase (fast k<sub>REL</sub>). \*P < 0.05 vs.  
 1096 *Palld*<sup>fl/fl</sup>; TAM; one-way analysis of variance (ANOVA) with Šidák's multiple comparisons test.

1097 The online version of this article includes the following figure supplement for Table 1:

1098 **Figure supplement 1.** Sarcomere-length tension relationship in cardiac myofibrils from the left ventricle of  
 1099 inducible cardiomyocyte-specific palladin knockout (cPKOi) and control male mice 2 months after  
 1100 tamoxifen (TAM) induction.

1101

1102 **Figure legends**

1103

1104 **Figure 1.** Palladin (PALLD) binds to cardiac ankyrin repeat protein (CARP/Ankrd1) and formin homology 2  
 1105 domain containing 1 (FHOD1) and is localized in the Z-line, I-band, intercalated disc (ICD), and nucleus in  
 1106 cardiomyocytes (CMCs). (A) Schematic representation of the domain structure of PALLD. Proline-rich  
 1107 regions are shown in yellow. Binding sites for known and novel interaction partners are shown with the ones

1108 in common with myopalladin (MYPN) in red. In a yeast two-hybrid screening, the N-terminal region of  
1109 PALLD, comprising 2 Ig domains, was found to bind to CARP and FHOD1, as illustrated. The interacting  
1110 region in FHOD1 was narrowed down to a region within the C-terminal region of FHOD1 (residue 965-  
1111 1052), as indicated. GBD, GTPase-binding domain; DID, diaphanous inhibitory domain; FH1, formin  
1112 homology 1 domain; FH2, formin homology 2 domain; DAD, diaphanous autoregulatory domain. **(B)**  
1113 Confirmation of PALLD-CARP and PALLD-FHOD1 interactions in NanoBRET protein interaction assays  
1114 with CARP-NanoLuc or FHOD1-NanoLuc as donor and fluorescently labeled PALLD-HaloTag as acceptor.  
1115 Data are represented as mean  $\pm$  standard error of the mean (SEM) ( $n = 3-4$ ).  $**P < 0.01$ ; Student's t-test. **(C)**  
1116 Immunofluorescence analysis of sectioned heart by STED microscopy, showing localization of both PALLD  
1117 and CARP in the sarcomeric I-band. **(D)** Confocal fluorescence microscopy showing the presence of PALLD  
1118 in the nucleus of CMCs. Both the PALLD 622 antibody and the PALLD Proteintech antibody showed  
1119 nuclear localization of PALLD in most CMCs (an example of a CMC without nuclear staining for PALLD is  
1120 shown on the bottom), while the PALLD 4D10 antibody did not stain the nucleus. Nuclei are visualized by  
1121 DAPI (blue). **(E)** Confocal fluorescence microscopy of sectioned heart, showing colocalization of PALLD  
1122 and FHOD1 at the ICD and the Z-line. **(F)** Confocal fluorescence microscopy showing colocalization of  
1123 PALLD and Sorbin And SH3 Domain Containing 2 (SORBS2) at the ICD in CMCs.

1124 The online version of this article includes the following source data and figure supplements for figure 1:

1125 **Source data 1.** Confirmation of PALLD-CARP and PALLD-FHOD1 interactions in NanoBRET protein  
1126 interaction assays.

1127 **Figure supplement 1.** Yeast-two hybrid assays showing the interaction of the N-terminal region of palladin  
1128 (PALLD) with cardiac ankyrin repeat protein (CARP/Ankrd1) and formin homology 2 domain containing 1  
1129 (FHOD1).

1130 **Figure supplement 2.** Confocal fluorescence microscopy showing the presence of palladin (PALLD) in the  
1131 nucleus of cardiomyocytes both from wild-type mice and cardiac ankyrin repeat protein (CARP/Ankrd1)  
1132 knockout (CKO) mice.

1133

1134 **Figure 2.** Echocardiographic and histological analyses of cardiomyocyte-specific palladin (cPKO) mice, and  
1135 cPKO and myopalladin (MYPN) double knockout (cPKO/MKO dKO) mice. **(A)** Quantitative real-time PCR  
1136 (qRT-PCR) for transcripts encoding the most common PALLD isoform on left ventricular (LV) RNA from

1137 8-week-old cPKO (*Palld*<sup>fl/fl</sup>; Cre<sup>+0</sup>) and control (*Palld*<sup>fl/fl</sup>) male mice ( $n = 3$  biological replicates and 3  
1138 technical replicates per group). \*\*\* $P < 0.001$ ; two-way analysis of variance (ANOVA) with Šidák's multiple  
1139 comparison test. (B) Western blot analysis for PALLD (PALLD 622 antibody) on LV lysate from cPKO and  
1140 control male mice. (C) Densitometric analysis for the 90 kDa PALLD isoform using GAPDH for  
1141 normalization ( $n = 4-6$  per group). \*\*\* $P < 0.001$ ; Student's t-test. (D) Echocardiography analyses of cPKO  
1142 and control male mice under basal conditions and 1, 2, and 4 weeks after transaortic constriction (TAC).  
1143 Pressure gradient  $> 70$  mmHg. LVID, left ventricular inner diameter; LVPW, left ventricular posterior wall  
1144 thickness; IVS, interventricular septum thickness; FS, fractional shortening; EF, ejection fraction; d, diastole;  
1145 s, systole ( $n = 4-14$  per group). \* $P < 0.05$ ; \*\* $P < 0.01$ ; linear mixed model with Tukey's multiple  
1146 comparisons test. (E) Hematoxylin and eosin (left, middle) and Picro Sirius Red (right) stainings of sections  
1147 of whole hearts and areas of the LV outer wall from cPKO and control male mice 4 weeks after TAC. (F)  
1148 Percent area of interstitial fibrosis in the LV ( $n = 3$  per group). No statistical difference by one-way ANOVA  
1149 with Tukey's multiple comparisons test. (G) Echocardiographic analysis of cPKO/MKO dKO vs. single KO  
1150 and control male mice at 2 and 4 months (M) of age. See (D) for abbreviations ( $n = 6-42$  per group). \* $P <$   
1151  $0.05$ ; \*\* $P < 0.01$ ; \*\*\* $P < 0.001$ ; linear mixed model with Tukey's multiple comparisons test. All data are  
1152 represented as mean  $\pm$  standard error of the mean (SEM).

1153 The online version of this article includes the following source data and figure supplements for figure 2:

1154 **Source data 1.** Quantitative real-time PCR (qRT-PCR) and densitometry of Western blots on  
1155 cardiomyocyte-specific palladin (cPKO) and control male mice.

1156 **Source data 2.** Uncropped Western blots for Figure 2B.

1157 **Source data 3.** Echocardiographic parameters of 3- and 6-month-old cardiomyocyte-specific palladin  
1158 knockout (cPKO) male mice compared to controls under basal conditions.

1159 **Source data 4.** Echocardiographic analysis on 3- and 6-month-old cardiomyocyte-specific palladin (cPKO)  
1160 and control male mice.

1161 **Source data 5.** Echocardiographic parameters of 8-week-old cardiomyocyte-specific palladin knockout  
1162 (cPKO) male mice compared to controls before and 4 weeks after mechanical pressure overload induced by  
1163 transaortic constriction (TAC).

1164 **Source data 6.** Echocardiographic analysis on cardiomyocyte-specific palladin (cPKO) and control male  
1165 mice subjected to transaortic constriction (TAC) or SHAM.

1166 **Source data 7:** Measurements of fibrotic area in the left ventricle of cardiomyocyte-specific palladin  
1167 (cPKO) and control male mice.

1168 **Source data 8.** Echocardiographic parameters of 3- and 6-month-old cardiomyocyte-specific palladin and  
1169 myopalladin double knockout (cPKO/MKO dKO) mice subjected to transaortic constriction (TAC) or  
1170 SHAM.

1171 **Source data 9.** Echocardiographic analysis on cardiomyocyte-specific palladin (cPKO) and myopalladin  
1172 (MYPN) double knockout and control male mice subjected to transaortic constriction (TAC) or SHAM.

1173 **Figure supplement 1.** Generation of *Palld* floxed mice.

1174 **Figure supplement 2.** Echocardiographic and histological analyses of cardiomyocyte-specific palladin  
1175 knockout (cPKO) male mice.

1176

1177 **Figure 3.** Echocardiographic and functional analyses of inducible cardiomyocyte-specific palladin knockout  
1178 (cPKOi) mice. **(A)** Quantitative real-time PCR (qRT-PCR) for transcripts encoding the most common  
1179 palladin (PALLD) isoforms on left ventricular (LV) RNA from cPKOi (*Palld*<sup>fl/fl</sup>;MCM<sup>+0</sup> TAM) and control  
1180 (*Palld*<sup>fl/fl</sup> TAM) mice 8 weeks after tamoxifen (TAM) induction ( $n = 4$  per group). \*\*\* $P < 0.001$ ; linear  
1181 mixed model with Tukey's multiple comparisons test. **(B)** Western blot analysis for PALLD (PALLD 622  
1182 antibody) on adult cardiomyocytes (CMCs) from cPKOi and control mice 8 week after TAM induction. **(C)**  
1183 Densitometric analysis for the 90 kDa PALLD isoform using GAPDH for normalization ( $n = 6-7$ ). \*\*\* $P <$   
1184  $0.001$ ; Student's t-test. **(D)** Echocardiographic analysis of cPKOi and control male mice 0, 8, and 24 weeks  
1185 after TAM induction. See Fig 2A for abbreviations. RWT, relative wall thickness ((LVPWd +  
1186 IVSd)/LVIDd); HW, heart weight, BW, body weight ( $n = 4-44$  per group). \* $P < 0.05$ ; \*\* $P < 0.01$ ; \*\*\* $P <$   
1187  $0.001$ ; linear mixed model with Tukey's multiple comparisons test. **(E)** Representative echocardiographic  
1188 short-axis M-mode images of hearts from cPKOi and control mice 24 weeks after TAM induction. **(F)**  
1189 IonOptix analysis of ventricular CMC contractility and Ca<sup>2+</sup> transients in cPKOi male mice vs. control mice 3  
1190 months after TAM induction. Top, Sarcomere shortening, time to 90% peak, and time to 50% relaxation ( $n =$   
1191 33 cells from 4 *Palld*<sup>fl/fl</sup> TAM mice,  $n = 34$  cells from 5 MCM<sup>+0</sup> TAM mice, and  $n = 52$  cells from 6  
1192 *Palld*<sup>fl/fl</sup>;MCM<sup>+0</sup> TAM mice). Bottom, amplitude of Ca<sup>2+</sup> transient, time to 90% peak of Ca<sup>2+</sup> transient, and  
1193 time to 50% decay of Ca<sup>2+</sup> transient ( $n = 39$  cells from 4 *Palld*<sup>fl/fl</sup> TAM mice,  $n = 18$  cells from 3 MCM<sup>+0</sup>



1194 TAM mice, and  $n = 58$  cells from 6 *Palld*<sup>fl/fl</sup>;MCM<sup>+0</sup> TAM mice). \* $P < 0.05$ ; \*\* $P < 0.01$ ; \*\*\* $P < 0.001$ ;  
1195 two-level hierarchical testing with Bonferroni correction (Sikkel et al., 2017). All data are represented as  
1196 mean  $\pm$  standard error of the mean (SEM).

1197 The online version of this article includes the following source data for figure 3:

1198 **Source data 1.** Quantitative real-time PCR (qRT-PCR) and densitometry of Western blots on inducible  
1199 cardiomyocyte-specific palladin (cPKOi) and control male mice.

1200 **Source data 2.** Uncropped Western blots for Figure 3B.

1201 **Source data 3.** Echocardiographic parameters of inducible cardiomyocyte-specific palladin knockout  
1202 (cPKOi) male mice compared to controls 2 and 6 months after tamoxifen (TAM) induction.

1203 **Source data 4.** Echocardiographic analysis on inducible cardiomyocyte-specific palladin (cPKOi) and  
1204 control male mice 2 and 6 months after tamoxifen (TAM) induction.

1205 **Source data 5.** Heart weight to body weight ratio (HW/BW) measurements on inducible cardiomyocyte-  
1206 specific palladin (cPKOi) and control male mice 2 and 6 months after tamoxifen (TAM) induction.

1207 **Source data 6.** Analysis of sarcomere shortening and Ca<sup>2+</sup> transients in cardiomyocytes from inducible  
1208 cardiomyocyte-specific palladin (cPKOi) and control male mice.

1209

1210 **Figure 4.** Histological and molecular analyses of cardiomyocyte-specific palladin knockout (cPKOi) mice.

1211 (A) Hematoxylin and eosin (top, middle) and Picro Sirius Red (bottom) stainings of sections of whole hearts  
1212 and areas of the left ventricular (LV) outer wall from cPKOi and control male mice 6 months after tamoxifen

1213 (TAM) induction. (B) Percent area of interstitial fibrosis in the LV ( $n = 3$  per group). \*\* $P < 0.01$ ; one-way  
1214 analysis of variance (ANOVA) with Tukey's multiple comparisons test. (C–E) Left, frequency distributions

1215 of cardiomyocyte (CMC) size ( $n = 830$  CMCs from 3 *Palld*<sup>fl/fl</sup> mice and 1079 CMCs from 3 *Palld*<sup>fl/fl</sup>;MCM<sup>+0</sup>  
1216 TAM mice) (C), length ( $n = 877$  CMCs from 3 *Palld*<sup>fl/fl</sup> mice and 1576 CMCs from 3 *Palld*<sup>fl/fl</sup>;MCM<sup>+0</sup> TAM

1217 mice) (D), and width ( $n = 842$  CMCs from 3 *Palld*<sup>fl/fl</sup> mice and 1565 CMCs from 3 *Palld*<sup>fl/fl</sup>;MCM<sup>+0</sup> TAM  
1218 mice) (E) in cPKOi and control male mice 3 months after TAM induction. Right, Average CMC size (C),

1219 length (D), and width (E) in the same mice. \* $P < 0.05$ ; \*\*\* $P < 0.001$ ; Student's t-test. (F) Quantitative real-  
1220 time PCR (qRT-PCR) analysis on LV RNA from cPKOi and control mice 6 months after TAM induction ( $n$

1221 = 4-5). *Gapdh* was used for normalization \* $P < 0.05$ ; \*\* $P < 0.01$ ; \*\*\* $P < 0.001$ ; one-way ANOVA with  
1222 Tukey's multiple comparisons test. All data are represented as mean  $\pm$  standard error of the mean (SEM).

1223 The online version of this article includes the following source data and figure supplements for figure 4:

1224 **Source data 1.** Cardiomyocyte (CMC) size, length, and width measurements in inducible cardiomyocyte-

1225 specific palladin (cPKOi) and control male mice 3 months after tamoxifen (TAM) induction.

1226 **Source data 2.** Measurements of fibrotic area in the left ventricle of inducible cardiomyocyte-specific

1227 palladin (cPKOi) and control male mice 6 months after tamoxifen (TAM) induction.

1228 **Source data 3.** Raw data for quantitative real-time PCR (qRT-PCR) on inducible cardiomyocyte-specific

1229 palladin (cPKOi) and control male mice 6 months after tamoxifen (TAM) induction.

1230 **Figure supplement 1.** Quantitative real-time PCR (qRT-PCR) analysis on left ventricle from inducible

1231 cardiomyocyte-specific palladin knockout (cPKOi) male mice compared to controls 6 months after

1232 tamoxifen (TAM) induction.

1233

1234 **Figure 5.** Transmission electron microscopy (TEM) analysis of papillary muscles from inducible

1235 cardiomyocyte-specific palladin knockout (cPKOi) and control mice. **(A)** Representative electron

1236 micrographs of papillary muscles from control (*Palld*<sup>fl/fl</sup> TAM) and cPKOi (*Palld*<sup>fl/fl</sup>;MCM<sup>+0</sup> TAM) male

1237 mice 2 months and 6 months after tamoxifen (TAM) induction. Black arrows indicate intercalated discs

1238 (ICDs). **(B)** Representative electron micrographs of ICD ultrastructure from 6-month-old control and cPKOi

1239 mice. Dashed black lines indicate ICD regions. **(C, D)** ICD fold amplitude frequency distribution (left) and

1240 average (right) in control and cPKOi samples 2 months ( $n = 147$  measurements on 20 ICDs from 2 *Palld*<sup>fl/fl</sup>

1241 mice and 279 measurements on 33 ICDs from 2 *Palld*<sup>fl/fl</sup>;MCM<sup>+0</sup> TAM mice) **(C)** and 6 months ( $n = 236$

1242 measurements on 30 ICDs from 2 *Palld*<sup>fl/fl</sup> mice and 420 measurements on 48 ICDs from 2 *Palld*<sup>fl/fl</sup>;MCM<sup>+0</sup>

1243 TAM mice) **(D)** after TAM induction. Data are represented as mean  $\pm$  standard error of the mean (SEM).

1244 \*\*\* $P < 0.001$ ; Welch's t-test. **(E)** Representative electron micrographs of ICDs from control and cPKOi

1245 mice 2 and 6 months after TAM induction. Asterisks show thick filaments in abnormal fold regions. **(F)**

1246 Electron micrographs showing altered sarcomeric regions (large black arrows) in the proximity of high-

1247 amplitude ICDs in papillary muscles from 6-month-old cPKOi mice. White arrows point to jagged Z-lines.

1248 Asterisks highlight groups of vesicles. The online version of this article includes the following source data

1249 for figure 5:

1250 **Source data 1.** Intercalated disc (ICD) fold amplitude measurements in inducible cardiomyocyte-specific

1251 palladin (cPKOi) and control male mice 2 and 6 months after tamoxifen (TAM) induction.

1252

1253 **Figure 6.** Molecular analyses on inducible cardiomyocyte-specific palladin knockout (cPKOi) mice and  
1254 human cardiomyopathy patients. **(A)** Western blot analyses for intercalated disc (ICD) proteins on left  
1255 ventricular (LV) lysate from cPKOi mice compared to control male mice 2 months after TAM induction.  
1256 Representative blots are shown. GAPDH was used as loading control. **(B)** Densitometric analysis of blots in  
1257 **(A)** using GAPDH for normalization ( $n = 3-4$  per group).  $*P < 0.05$ , one-way analysis of variance (ANOVA)  
1258 with Tukey's multiple comparisons test. **(C)** Quantitative real-time PCR (qRT-PCR) analysis for *MYPN*,  
1259 *PALLD* and *ANKRD1* on LV biopsies from ischemic cardiomyopathy (ICM) ( $n = 8$ ) and dilated  
1260 cardiomyopathy (DCM) ( $n = 8$ ) male patients vs. healthy control (Ctrl) hearts ( $n = 5$ ). *HPRT* was used for  
1261 normalization.  $*P < 0.05$ ,  $**P < 0.01$ ; Brown-Forsythe and Welch ANOVA with Dunnett's T3 multiple  
1262 comparisons test. All data are represented as mean  $\pm$  standard error of the mean (SEM).

1263 The online version of this article includes the following source data and figure supplements for figure 6:

1264 **Source data 1.** Uncropped Western blots for Figure 6A.

1265 **Source data 2.** Densitometry on Western blots on inducible cardiomyocyte-specific palladin (cPKOi) and  
1266 control male mice 2 months after tamoxifen (TAM) induction.

1267 **Source data 3.** Quantitative real-time PCR (qRT-PCR) analysis on left ventricular biopsies from patients  
1268 with dilated (DCM) and ischemic (ICM) cardiomyopathy vs. healthy control (Ctrl) hearts.

1269 **Source data 4.** Uncropped Western blots for Figure 6–figure supplement 3.

1270 **Source data 5.** Uncropped Western blots for Figure 6–figure supplement 4.

1271 **Figure supplement 1.** Immunofluorescence stainings for intercalated disc proteins of cardiomyocytes from  
1272 inducible cardiomyocyte-specific palladin knockout (cPKOi) and control male mice 4 months after  
1273 tamoxifen (TAM) induction. Nuclei are visualized by DAPI (blue).

1274 **Figure supplement 2.** Immunofluorescence stainings of cardiomyocytes for palladin (PALLD) interacting  
1275 proteins from inducible cardiomyocyte-specific palladin knockout (cPKOi) and control male mice 4 months  
1276 after tamoxifen (TAM) induction. Nuclei are visualized by DAPI (blue).

1277 **Figure supplement 3.** Western blot analysis for palladin (PALLD) interacting proteins and proteins  
1278 involved in cardiac signaling pathways on left ventricular lysate from inducible cardiomyocyte-specific  
1279 palladin knockout (cPKOi) and control male mice 2 months after tamoxifen (TAM) induction. GAPDH was  
1280 used as loading control. No differences were found.

1281 **Figure supplement 4.** Titin isoform expression and phosphorylation in the left ventricular of inducible  
1282 cardiomyocyte-specific palladin knockout (cPKOi) and control male mice 2 months after tamoxifen (TAM)  
1283 induction.

1284 **Figure supplement 5.** Patient characteristics.

1285

1286 **Supplementary file 1.** Oligos used for quantitative real-time PCR (qRT-PCR) and clonings.

1287

1288 **Figure supplement legends**

1289

1290 **Figure 1–figure supplement 1.** Yeast-two hybrid assays showing the interaction of the N-terminal region of  
1291 palladin (PALLD) with cardiac ankyrin repeat protein (CARP/Ankrd1) and formin homology 2 domain  
1292 containing 1 (FHOD1). (A) Culture plate with different combinations of Y2H cotransformations to narrow  
1293 down the interaction size between PALLD and CARP as indicated in the table. PALLD's N-terminal region  
1294 binds to CARP. (B) Culture plate with different combinations of Y2H cotransformations to narrow down the  
1295 interaction size between PALLD and FHOD1 as indicated in the table. FHOD1 residue 965-1052 is  
1296 sufficient for binding to the N-terminal region of both PALLD and its homologue MYPN.

1297

1298 **Figure 1–figure supplement 2.** Confocal fluorescence microscopy showing the presence of palladin  
1299 (PALLD) in the nucleus of cardiomyocytes both from wild-type (WT) mice and cardiac ankyrin repeat  
1300 protein (CARP/Ankrd1) knockout (CKO) mice.

1301

1302 **Figure 2–figure supplement 1.** Generation of *Palld* floxed mice. (A) Targeting strategy for the generation  
1303 of *Palld* floxed mice containing LoxP sites flanking exon 15. A restriction map of the relevant genomic  
1304 region of *Palld* is shown on the top, the targeting construct is shown in the middle, and the mutated locus  
1305 after recombination is shown at the bottom. Arrowheads indicate loxP sites and black boxes indicate FLPase  
1306 Recognition Target (FLP) sites. Neo, neomycin resistance gene; DTA, diphtheria toxin A fragment gene. (B)  
1307 Detection of wild-type (WT) and targeted alleles by Southern blot analysis following digestion with EcoRV  
1308 using the probe shown in A. (C) Genotyping of WT and *Palld* floxed mice after removal of the neo cassette  
1309 using *Palld*-specific primers. All data are represented as mean  $\pm$  standard error of the mean (SEM).

1310

1311 **Figure 2–figure supplement 2.** Echocardiographic and histological analyses of cardiomyocyte-specific  
1312 palladin knockout (cPKO) male mice. **(A)** Echocardiographic analysis of cPKO and control male mice at 3  
1313 and 6 months (M) of age. LVID, left ventricular inner diameter; LVPW, left ventricular posterior wall  
1314 thickness; IVS, interventricular septum thickness; FS, fractional shortening; EF, ejection fraction; d, diastole;  
1315 s, systole ( $n = 7-17$  per group).  $*P < 0.05$ ; LMM with Tukey's multiple comparisons test. **(B)** Hematoxylin  
1316 and eosin (top, middle) and Picro Sirius Red (bottom) stainings of sections of whole hearts and areas of the  
1317 left ventricular (LV) outer wall from 6-month-old cPKO and control male mice. **(C)** Percent area of  
1318 interstitial fibrosis in the LV ( $n = 3-7$  per group). No statistical difference by one-way analysis of variance  
1319 (ANOVA) with Tukey' multiple comparisons test. All data are represented as mean  $\pm$  standard error of the  
1320 mean (SEM).

1321

1322 **Figure 4–figure supplement 1.** Quantitative real-time PCR (qRT-PCR) analysis on left ventricle from  
1323 inducible cardiomyocyte-specific palladin knockout (cPKOi) male mice compared to controls 6 months after  
1324 tamoxifen (TAM) induction.

1325

1326 **Figure 6–figure supplement 1.** Immunofluorescence stainings for intercalated disc proteins of  
1327 cardiomyocytes from inducible cardiomyocyte-specific palladin knockout (cPKOi) and control male mice 4  
1328 months after tamoxifen (TAM) induction. Nuclei are visualized by DAPI (blue).

1329

1330 **Figure 6–figure supplement 2.** Immunofluorescence stainings of cardiomyocytes for palladin (PALLD)  
1331 interacting proteins from inducible cardiomyocyte-specific palladin knockout (cPKOi) and control male  
1332 mice 4 months after tamoxifen (TAM) induction. Nuclei are visualized by DAPI (blue).

1333

1334 **Figure 6–figure supplement 3.** Western blot analysis for palladin (PALLD) interacting proteins and  
1335 proteins involved in cardiac signaling pathways on left ventricular lysate from inducible cardiomyocyte-  
1336 specific palladin knockout (cPKOi) and control male mice 2 months after tamoxifen (TAM) induction.  
1337 GAPDH was used as loading control. No differences were found.

1338

1339 **Figure 6–figure supplement 4.** Titin isoform expression and phosphorylation in the left ventricular of  
1340 inducible cardiomyocyte-specific palladin knockout (cPKOi) and control male mice 2 months after  
1341 tamoxifen (TAM) induction. **(A)** SDS-PAGE and Coomassie blue staining for titin (TTN) N2BA and N2B  
1342 isoforms as well as Western blot analyses using anti-phosphoserine/threonine antibody (pTTN-Ser/Thr) and  
1343 titin phosphosite-specific antibodies against pTTN-Ser3991 (corresponding to human pTTN-Ser4010 in the  
1344 N2Bus region), pTTN-Ser4080 (corresponding to human pTTN-Ser4099 in the N2Bus region), and pTTN-  
1345 Ser12742 (corresponding to human pTTN-Ser11878 in the PEVK region). **(B)** Densitometric analysis of  
1346 blots in **(A)** for titin (TTN) N2BA/N2B isoform ratio as well as titin serine/threonine phosphorylation and  
1347 site-specific titin phosphorylation. Normalization was performed to total protein content as determined by  
1348 Coomassie blue staining of each blot ( $n = 3$  per group). No statistical differences by unpaired Student's t-  
1349 test. All data are represented as mean  $\pm$  SEM.

1350

1351 **Figure 6–figure supplement 5.** Patient characteristics.

1352

1353 **Table 1–figure supplement 1.** Sarcomere-length tension relationship in cardiac myofibrils from the left  
1354 ventricle of inducible cardiomyocyte-specific palladin knockout (cPKOi) and control male mice 2 months  
1355 after tamoxifen (TAM) induction. Each data point is represented as mean  $\pm$  standard error of the mean  
1356 (SEM) from 4-12 myofibrils from 3 *Palld*<sup>fl/fl</sup> TAM mice, from 11-19 myofibrils from 3 MCM<sup>+0</sup> TAM mice  
1357 and from 5-15 myofibrils from 3 *Palld*<sup>fl/fl</sup>;MCM<sup>+0</sup> TAM mice.

1358

1359 **Supplementary file 1.** Oligos used for quantitative real-time PCR (qRT-PCR) and clonings.

1360

1361 **Source data files**

1362 **Figure 1–Source data 1.** Confirmation of PALLD-CARP and PALLD-FHOD1 interactions in NanoBRET  
1363 protein interaction assays.

1364 **Figure 2–Source data 1.** Quantitative real-time PCR (qRT-PCR) and densitometry of Western blots on  
1365 cardiomyocyte-specific palladin (cPKO) and control male mice.

1366 **Figure 2–Source data 2.** Uncropped Western blots for Figure 2B.

1367 **Figure 2–Source data 3.** Echocardiographic parameters of 3- and 6-month-old cardiomyocyte-specific  
1368 palladin knockout (cPKO) male mice compared to controls under basal conditions.

1369 **Figure 2–Source data 4.** Echocardiographic analysis on 3- and 6-month-old cardiomyocyte-specific  
1370 palladin (cPKO) and control male mice.

1371 **Figure 2–Source data 5.** Echocardiographic parameters of 8-week-old cardiomyocyte-specific palladin  
1372 knockout (cPKO) male mice compared to controls before and 4 weeks after mechanical pressure overload  
1373 induced by transaortic constriction (TAC).

1374 **Figure 2–Source data 6.** Echocardiographic analysis on cardiomyocyte-specific palladin (cPKO) and  
1375 control male mice subjected to transaortic constriction (TAC) or SHAM.

1376 **Figure 2–Source data 7:** Measurements of fibrotic area in the left ventricle of cardiomyocyte-specific  
1377 palladin (cPKO) and control male mice.

1378 **Figure 2–Source data 8.** Echocardiographic parameters of 3- and 6-month-old cardiomyocyte-specific  
1379 palladin and myopalladin double knockout (cPKO/MKO dKO) mice subjected to transaortic constriction  
1380 (TAC) or SHAM.

1381 **Figure 2–Source data 9.** Echocardiographic analysis on cardiomyocyte-specific palladin (cPKO) and  
1382 myopalladin (MYPN) double knockout and control male mice subjected to transaortic constriction (TAC) or  
1383 SHAM.

1384 **Figure 3–Source data 1.** Quantitative real-time PCR (qRT-PCR) and densitometry of Western blots on  
1385 inducible cardiomyocyte-specific palladin (cPKOi) and control male mice.

1386 **Figure 3–Source data 2.** Uncropped Western blots for Figure 3B.

1387 **Figure 3–Source data 3.** Echocardiographic parameters of inducible cardiomyocyte-specific palladin  
1388 knockout (cPKOi) male mice compared to controls 2 and 6 months after tamoxifen (TAM) induction.

1389 **Figure 3–Source data 4.** Echocardiographic analysis on inducible cardiomyocyte-specific palladin (cPKOi)  
1390 and control male mice 2 and 6 months after tamoxifen (TAM) induction.

1391 **Figure 3–Source data 5.** Heart weight to body weight ratio (HW/BW) measurements on inducible  
1392 cardiomyocyte-specific palladin (cPKOi) and control male mice 2 and 6 months after tamoxifen (TAM)  
1393 induction.

1394 **Figure 3–Source data 6.** Analysis of sarcomere shortening and  $Ca^{2+}$  transients in cardiomyocytes from  
1395 inducible cardiomyocyte-specific palladin (cPKOi) and control male mice.

- 1396 **Figure 4–Source data 1.** Cardiomyocyte (CMC) size, length, and width measurements in inducible  
1397 cardiomyocyte-specific palladin (cPKOi) and control male mice 3 months after tamoxifen (TAM) induction.
- 1398 **Figure 4–Source data 2.** Measurements of fibrotic area in the left ventricle of inducible cardiomyocyte-  
1399 specific palladin (cPKOi) and control male mice 6 months after tamoxifen (TAM) induction.
- 1400 **Figure 4–Source data 3.** Raw data for quantitative real-time PCR (qRT-PCR) on inducible cardiomyocyte-  
1401 specific palladin (cPKOi) and control male mice 6 months after tamoxifen (TAM) induction.
- 1402 **Figure 5–Source data 1.** Intercalated disc (ICD) fold amplitude measurements in inducible cardiomyocyte-  
1403 specific palladin (cPKOi) and control male mice 2 and 6 months after tamoxifen (TAM) induction.
- 1404 **Figure 6–Source data 1.** Uncropped Western blots for Figure 6A.
- 1405 **Figure 6–Source data 2.** Densitometry on Western blots on inducible cardiomyocyte-specific palladin  
1406 (cPKOi) and control male mice 2 months after tamoxifen (TAM) induction.
- 1407 **Figure 6–Source data 3.** Quantitative real-time PCR (qRT-PCR) analysis on left ventricular biopsies from  
1408 patients with dilated (DCM) and ischemic (ICM) cardiomyopathy vs. healthy control (Ctrl) hearts.
- 1409 **Figure 6–Source data 4.** Uncropped Western blots for Figure 6–figure supplement 3.
- 1410 **Figure 6–Source data 5.** Uncropped Western blots for Figure 6–figure supplement 4.



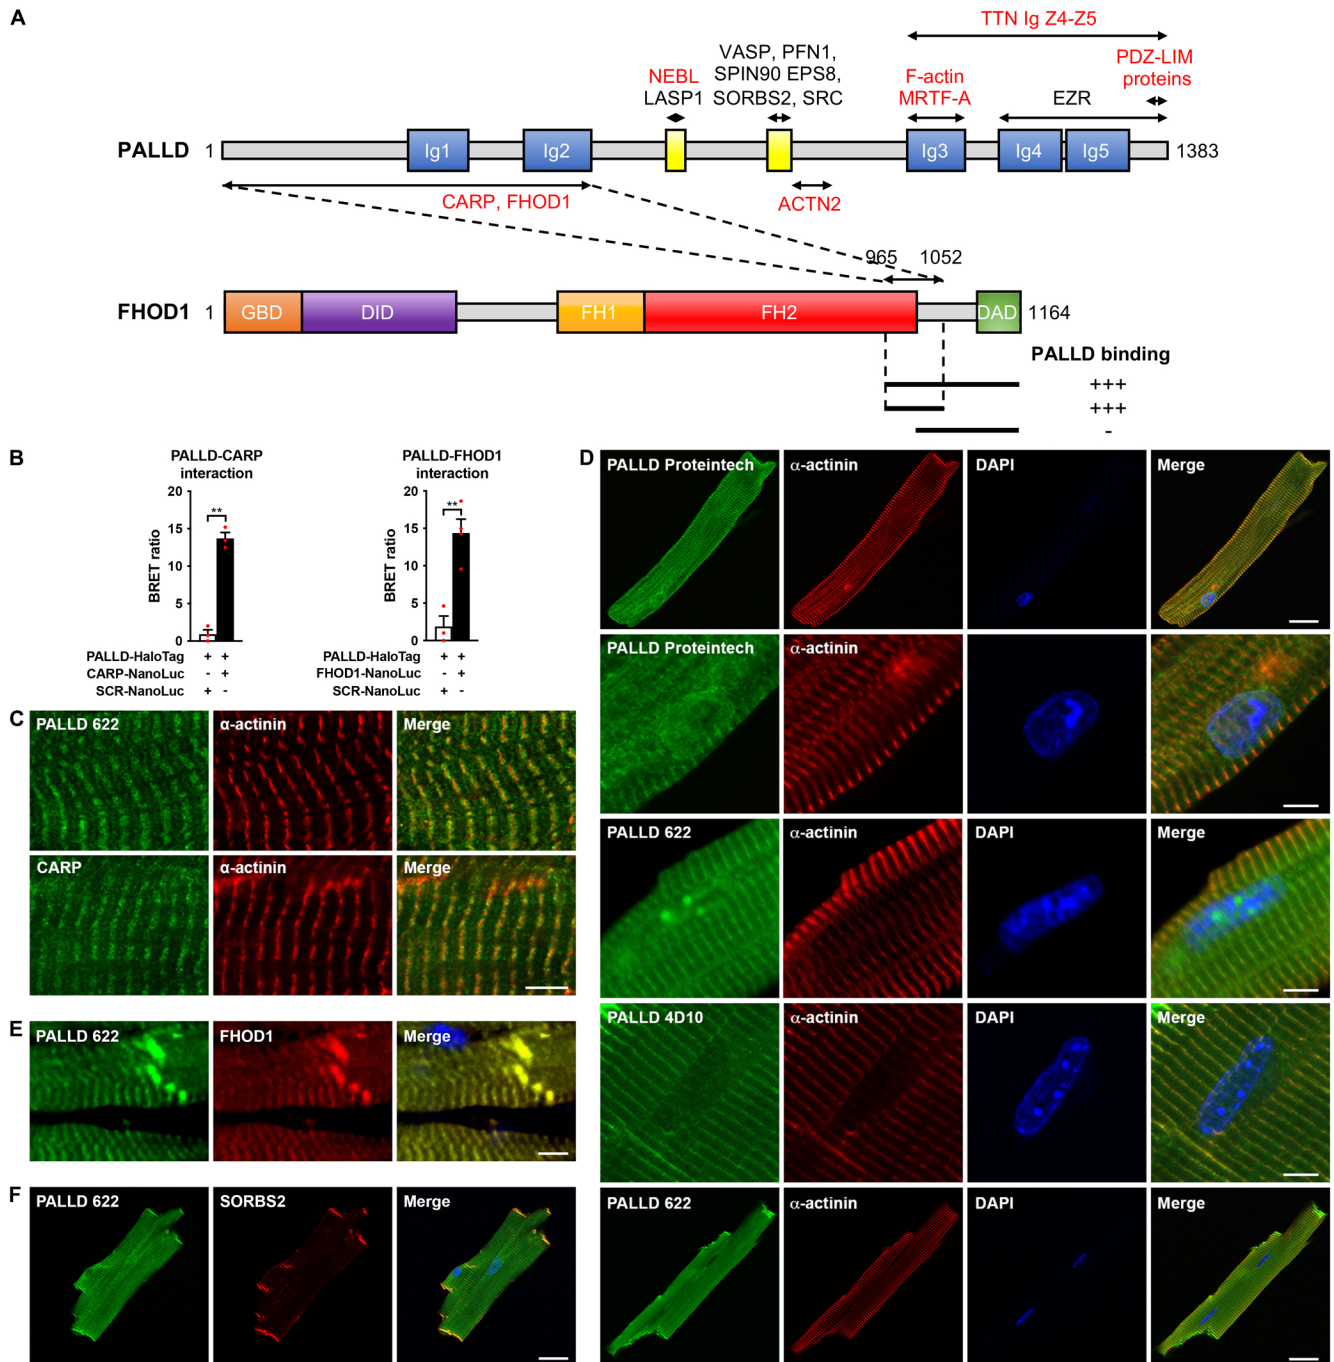

Figure 1

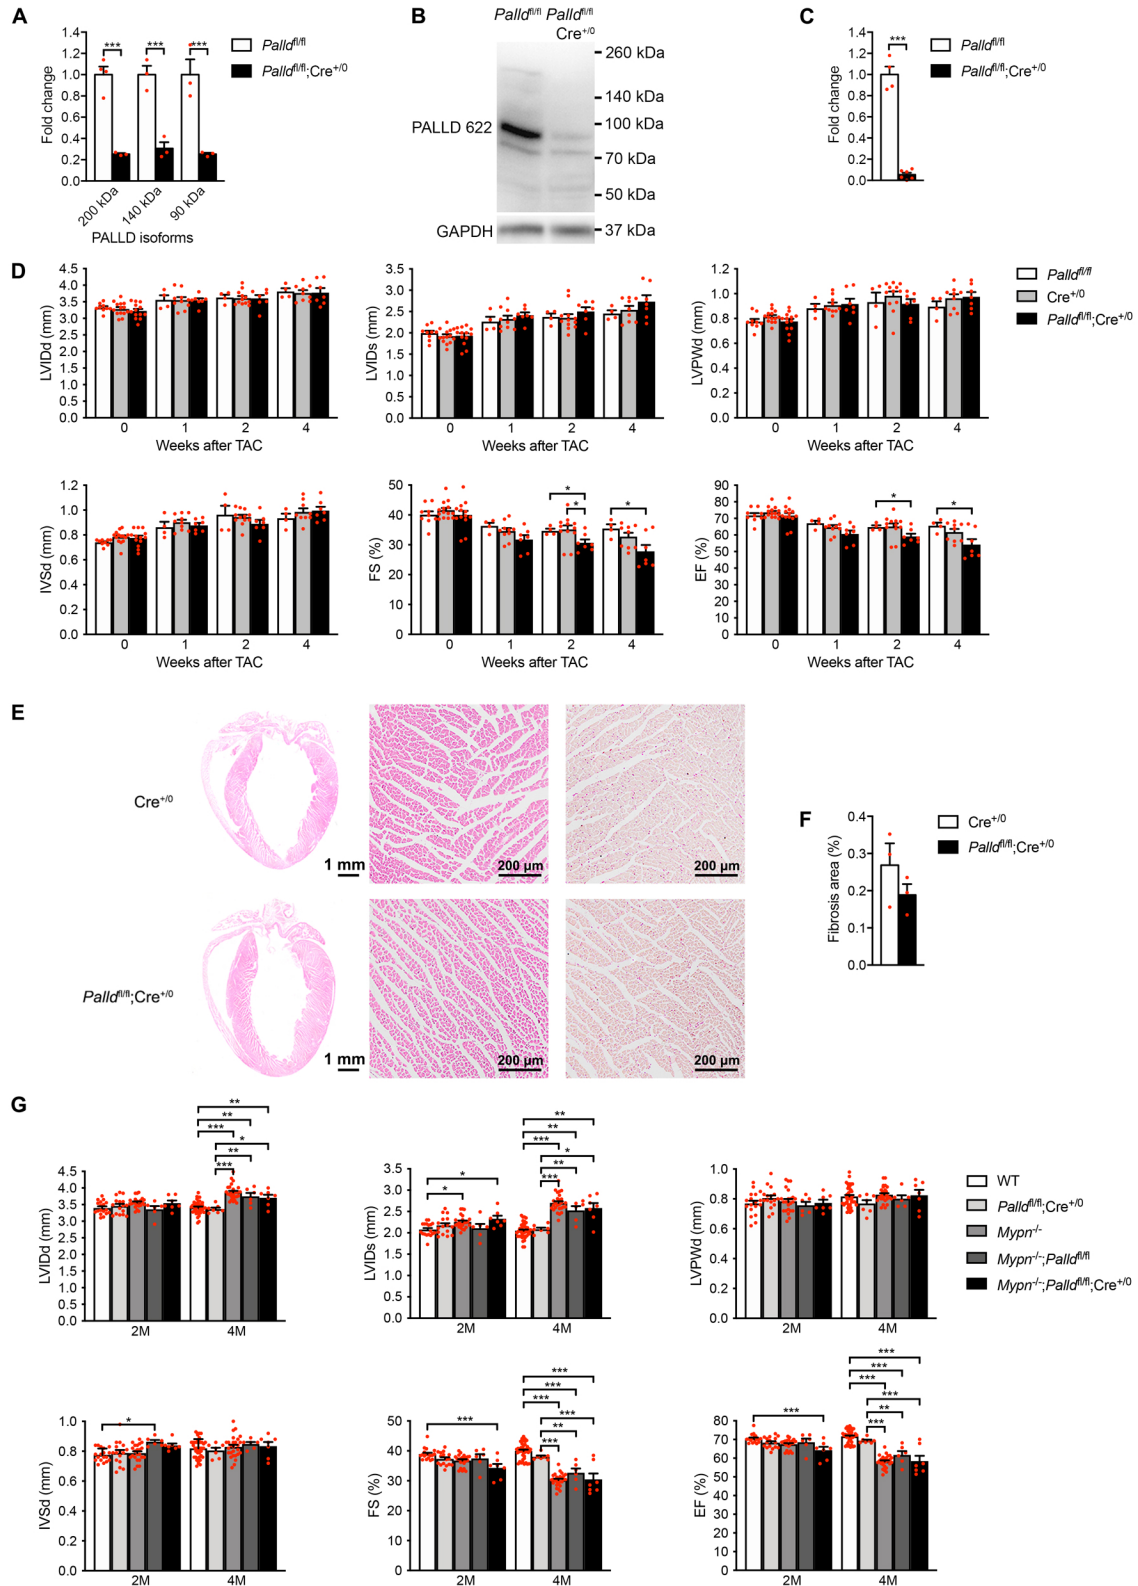

Figure 2

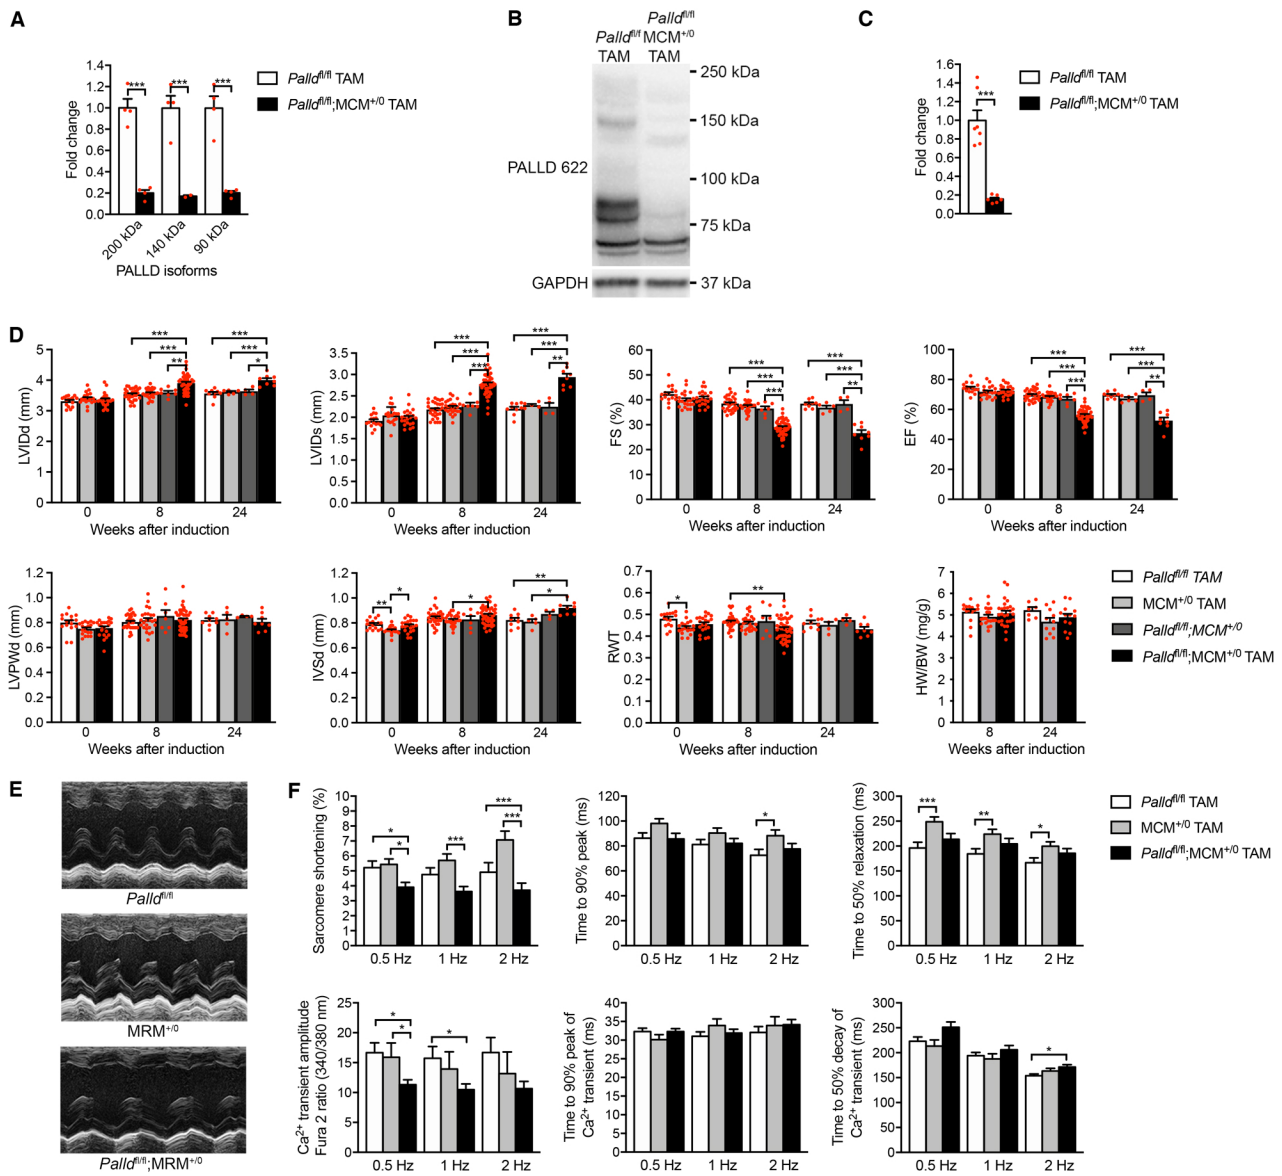

Figure 3

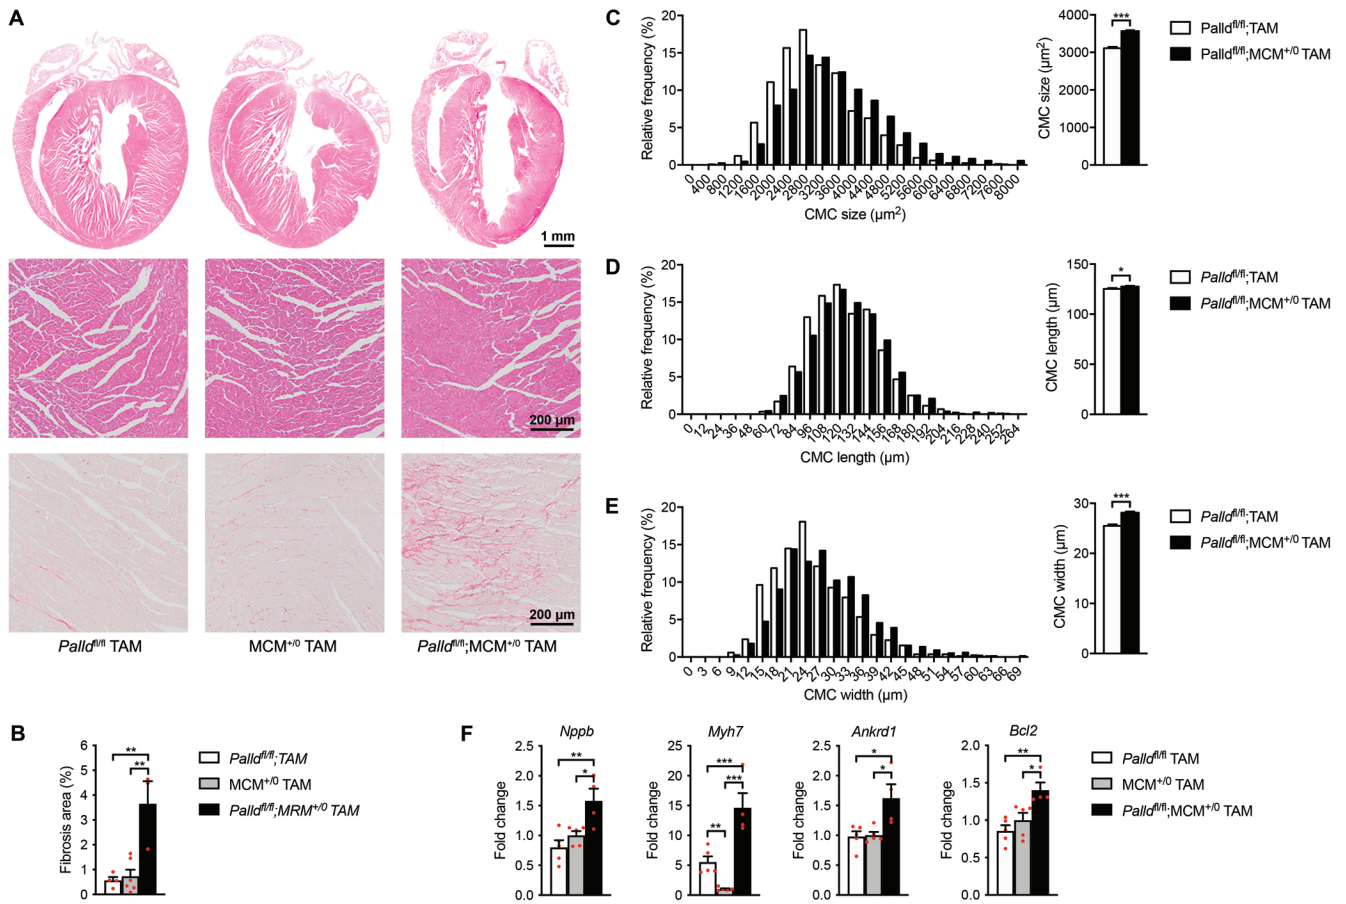

Figure 4

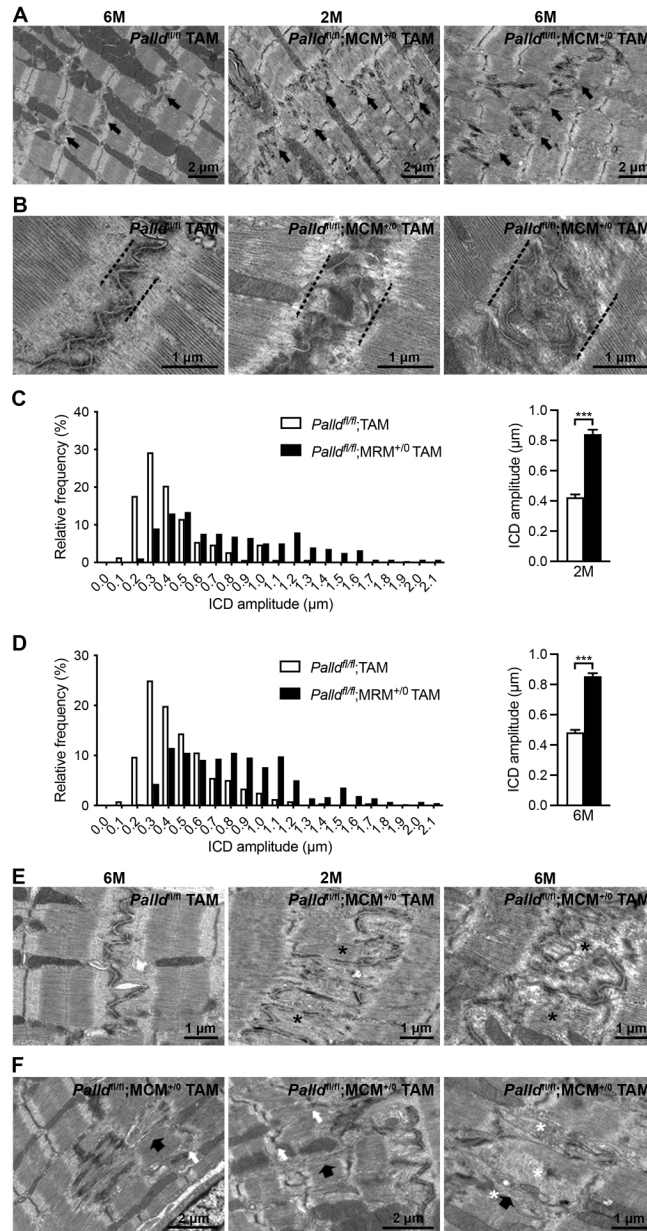

Figure 5

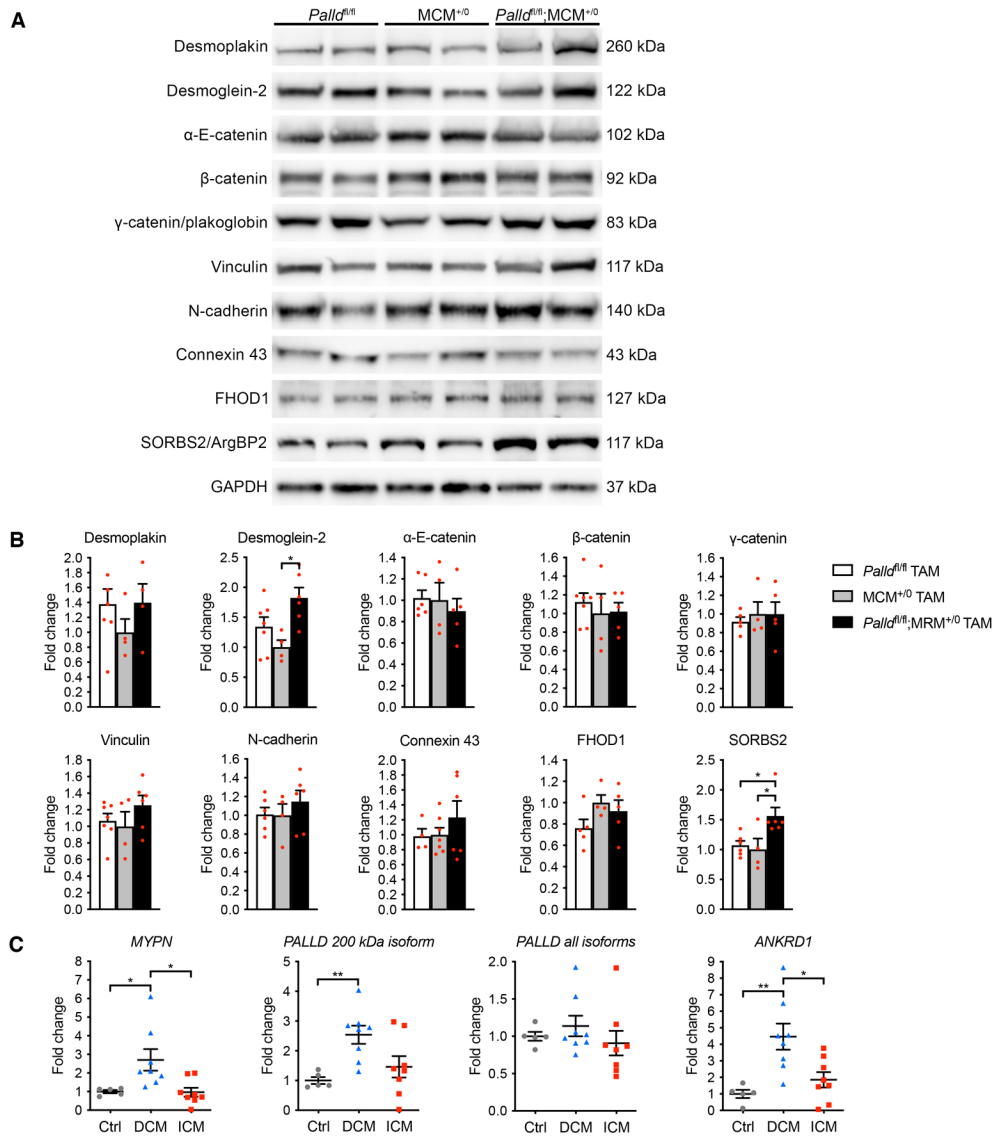

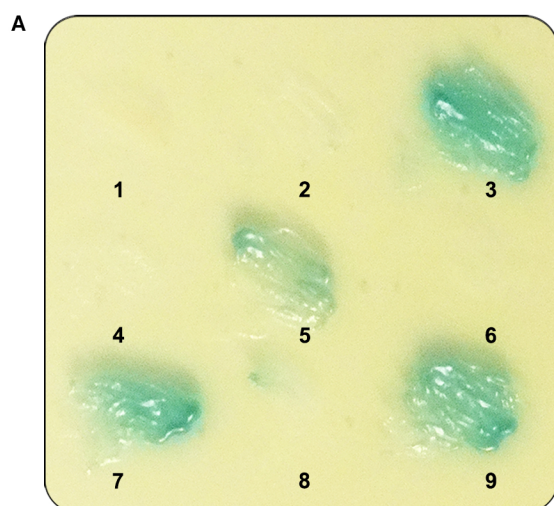

| No | pGBKT7                   | pGADT7-AD | Interaction |
|----|--------------------------|-----------|-------------|
| 1  | pGBKT7                   | CARP      | -           |
| 2  | MYPN FL                  | pGADT7-AD | -           |
| 3  | MYPN FL                  | CARP      | +++         |
| 4  | MYPN N-term (start-Ig2)  | pGADT7-AD | -           |
| 5  | MYPN N-term (start-Ig2)  | CARP      | +++         |
| 6  | PALLD N-term (start-Ig2) | pGADT7-AD | -           |
| 7  | PALLD N-term (start-Ig2) | CARP      | +++         |
| 8  | PALLD 200 kDa isoform    | pGADT7-AD | -           |
| 9  | PALLD 200 kDa isoform    | CARP      | +++         |

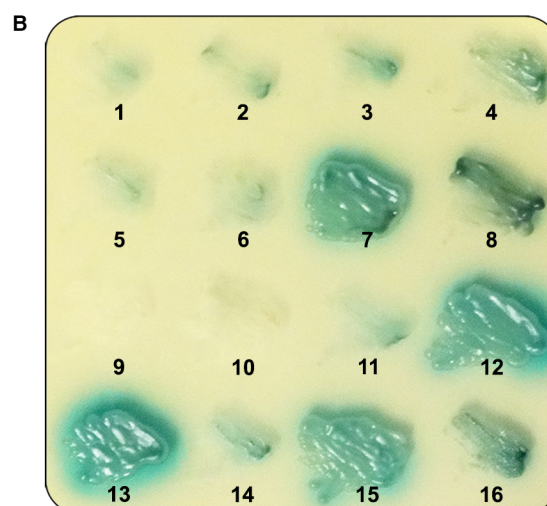

| No | pGBKT7                   | pGADT7-AD         | Interaction |
|----|--------------------------|-------------------|-------------|
| 1  | pGBKT7                   | FHOD1 (3005-3607) | -           |
| 2  | pGBKT7                   | FHOD1 (3005-3268) | -           |
| 3  | pGBKT7                   | FHOD1 (3152-3607) | -           |
| 4  | PALLD C-term (Ig3-end)   | pGADT7-AD         | -           |
| 5  | PALLD N-term (start-Ig2) | pGADT7-AD         | -           |
| 6  | PALLD C-term (Ig3-end)   | FHOD1 (3005-3268) | -           |
| 7  | PALLD N-term (start-Ig2) | FHOD1 (3005-3268) | +++         |
| 8  | PALLD N-term (start-Ig2) | FHOD1 (3152-3607) | -           |
| 9  | MYPN full-length         | pGADT7-AD         | -           |
| 10 | MYPN N-term (start-Ig2)  | pGADT7-AD         | -           |
| 11 | MYPN C-term (Ig3-end)    | pGADT7-AD         | -           |
| 12 | MYPN full-length         | FHOD1 (3005-3607) | +++         |
| 13 | MYPN full-length         | FHOD1 (3005-3268) | +++         |
| 14 | MYPN full-length         | FHOD1 (3152-3607) | -           |
| 15 | MYPN N-term (start-Ig2)  | FHOD1 (3005-3268) | +++         |
| 16 | MYPN C-term (Ig3-end)    | FHOD1 (3005-3268) | -           |

Figure 1-figure supplement 1

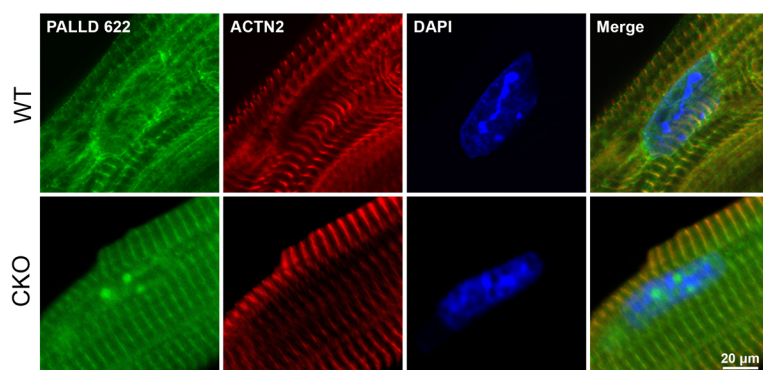

Figure 1-figure supplement 2



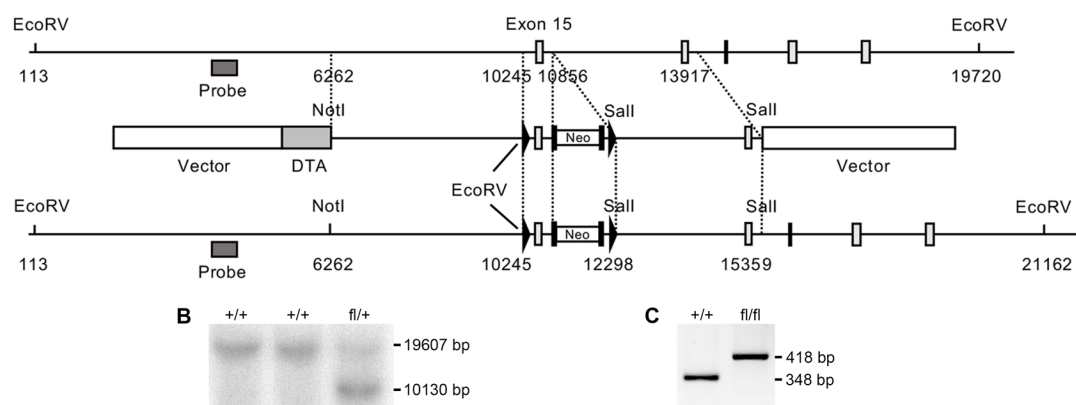

Figure 2-figure supplement 1

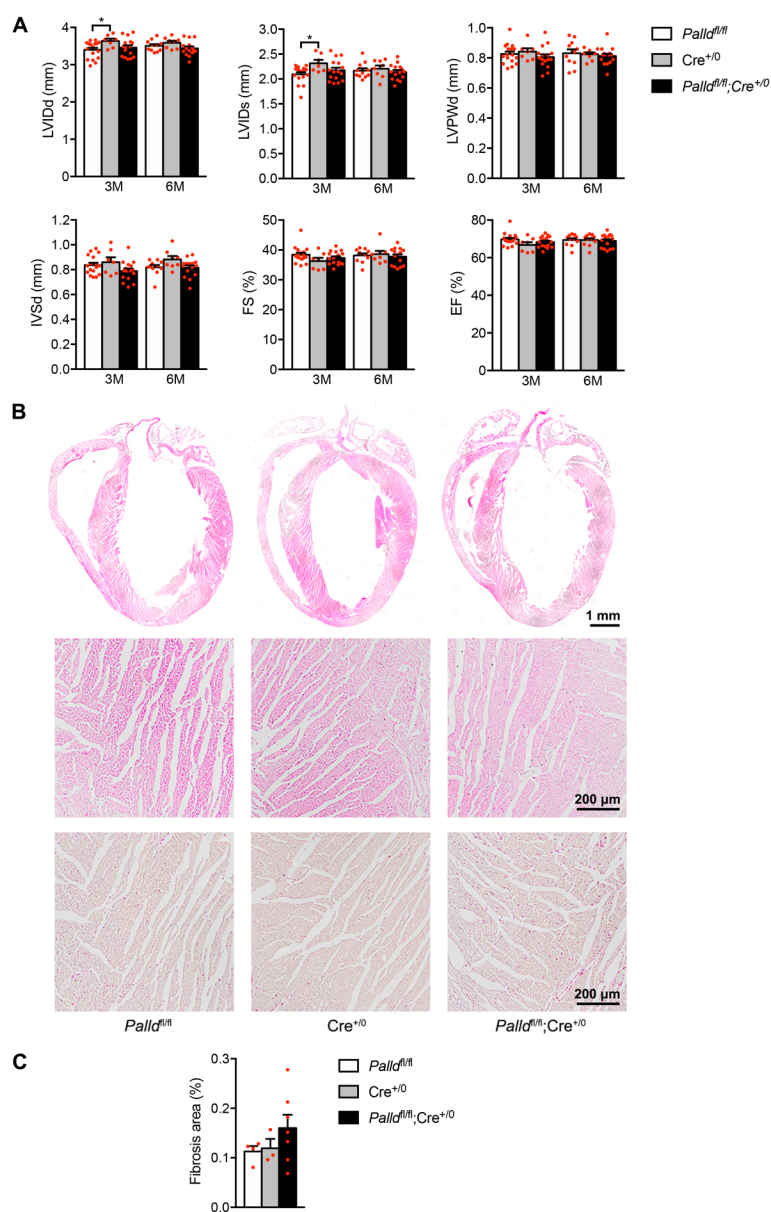

Figure 2-figure supplement 2

**Figure 4–figure supplement 1.** Quantitative real-time PCR (qRT-PCR) analysis on left ventricle from inducible cardiomyocyte-specific palladin knockout (cPKO<sub>i</sub>) male mice compared to controls 6 months after tamoxifen (TAM) induction.

| Gene             | <i>Pald</i> <sup>fl/fl</sup> TAM<br>(n = 5) | MRM <sup>+/-0</sup> TAM<br>(n = 5) | <i>Pald</i> <sup>fl/fl</sup> ;MRM <sup>+/-0</sup> TAM<br>(n = 4) |
|------------------|---------------------------------------------|------------------------------------|------------------------------------------------------------------|
| <i>Nppa</i>      | 0.85 ± 0.28                                 | 1.00 ± 0.10                        | 1.08 ± 0.25                                                      |
| <i>Nppb</i>      | 0.80 ± 0.12                                 | 1.00 ± 0.07                        | 1.58 ± 0.21** <sup>‡</sup>                                       |
| <i>Myh6</i>      | 0.67 ± 0.06                                 | 1.00 ± 0.05                        | 0.72 ± 0.06                                                      |
| <i>Myh7</i>      | 5.52 ± 1.96                                 | 1.00 ± 0.14**                      | 14.61 ± 2.47*** <sup>‡</sup>                                     |
| <i>Actc1</i>     | 0.97 ± 0.07                                 | 1.00 ± 0.05                        | 1.01 ± 0.09                                                      |
| <i>Acta1</i>     | 0.50 ± 0.12                                 | 1.00 ± 0.10*                       | 0.73 ± 0.10                                                      |
| <i>Ankrd1</i>    | 0.98 ± 0.09                                 | 1.00 ± 0.06                        | 1.62 ± 0.23* <sup>‡</sup>                                        |
| <i>Nebl</i>      | 0.87 ± 0.06                                 | 1.00 ± 0.09                        | 0.89 ± 0.08                                                      |
| <i>Ldb3</i>      | 1.19 ± 0.33                                 | 1.00 ± 0.23                        | 2.03 ± 0.34                                                      |
| <i>Pdlim3</i>    | 1.19 ± 0.08                                 | 1.00 ± 0.20                        | 1.45 ± 0.15                                                      |
| <i>Des</i>       | 0.95 ± 0.03                                 | 1.00 ± 0.03                        | 0.92 ± 0.04                                                      |
| <i>Tnncl</i>     | 1.06 ± 0.02                                 | 1.00 ± 0.03                        | 1.07 ± 0.08                                                      |
| <i>Atp2a2</i>    | 0.96 ± 0.05                                 | 1.00 ± 0.06                        | 0.89 ± 0.07                                                      |
| <i>Srf</i>       | 1.10 ± 0.09                                 | 1.00 ± 0.05                        | 1.16 ± 0.09                                                      |
| <i>Mk11</i>      | 0.86 ± 0.03                                 | 1.00 ± 0.04                        | 0.96 ± 0.07                                                      |
| <i>Colla1</i>    | 0.81 ± 0.06                                 | 1.00 ± 0.05                        | 1.11 ± 0.16                                                      |
| <i>Col3a1</i>    | 0.95 ± 0.10                                 | 1.00 ± 0.08                        | 0.96 ± 0.15                                                      |
| <i>Ctgf/Ccn2</i> | 1.02 ± 0.12                                 | 1.00 ± 0.11                        | 1.37 ± 0.18                                                      |
| <i>Acta2</i>     | 0.79 ± 0.11                                 | 1.00 ± 0.12                        | 0.59 ± 0.11                                                      |
| <i>Tgfb1</i>     | 0.92 ± 0.06                                 | 1.00 ± 0.10                        | 0.97 ± 0.06                                                      |
| <i>Bcl2</i>      | 0.86 ± 0.08                                 | 1.00 ± 0.10                        | 1.40 ± 0.10*** <sup>‡</sup>                                      |
| <i>Bax</i>       | 0.90 ± 0.07                                 | 1.00 ± 0.06                        | 1.12 ± 0.10                                                      |
| <i>Tp53</i>      | 0.88 ± 0.05                                 | 1.00 ± 0.09                        | 1.06 ± 0.09                                                      |
| <i>Egr1</i>      | 0.76 ± 0.24                                 | 1.00 ± 0.11                        | 1.56 ± 0.36                                                      |

All values are presented as mean ± standard error of the mean (SEM). \**P* < 0.05, \*\**P* < 0.01 vs. *Pald*<sup>fl/fl</sup>; <sup>‡</sup>*P* < 0.05, \*\*\**P* < 0.001 vs. Cre<sup>+/-0</sup>; one-way analysis of variance (ANOVA) with Tukey's multiple comparisons test.

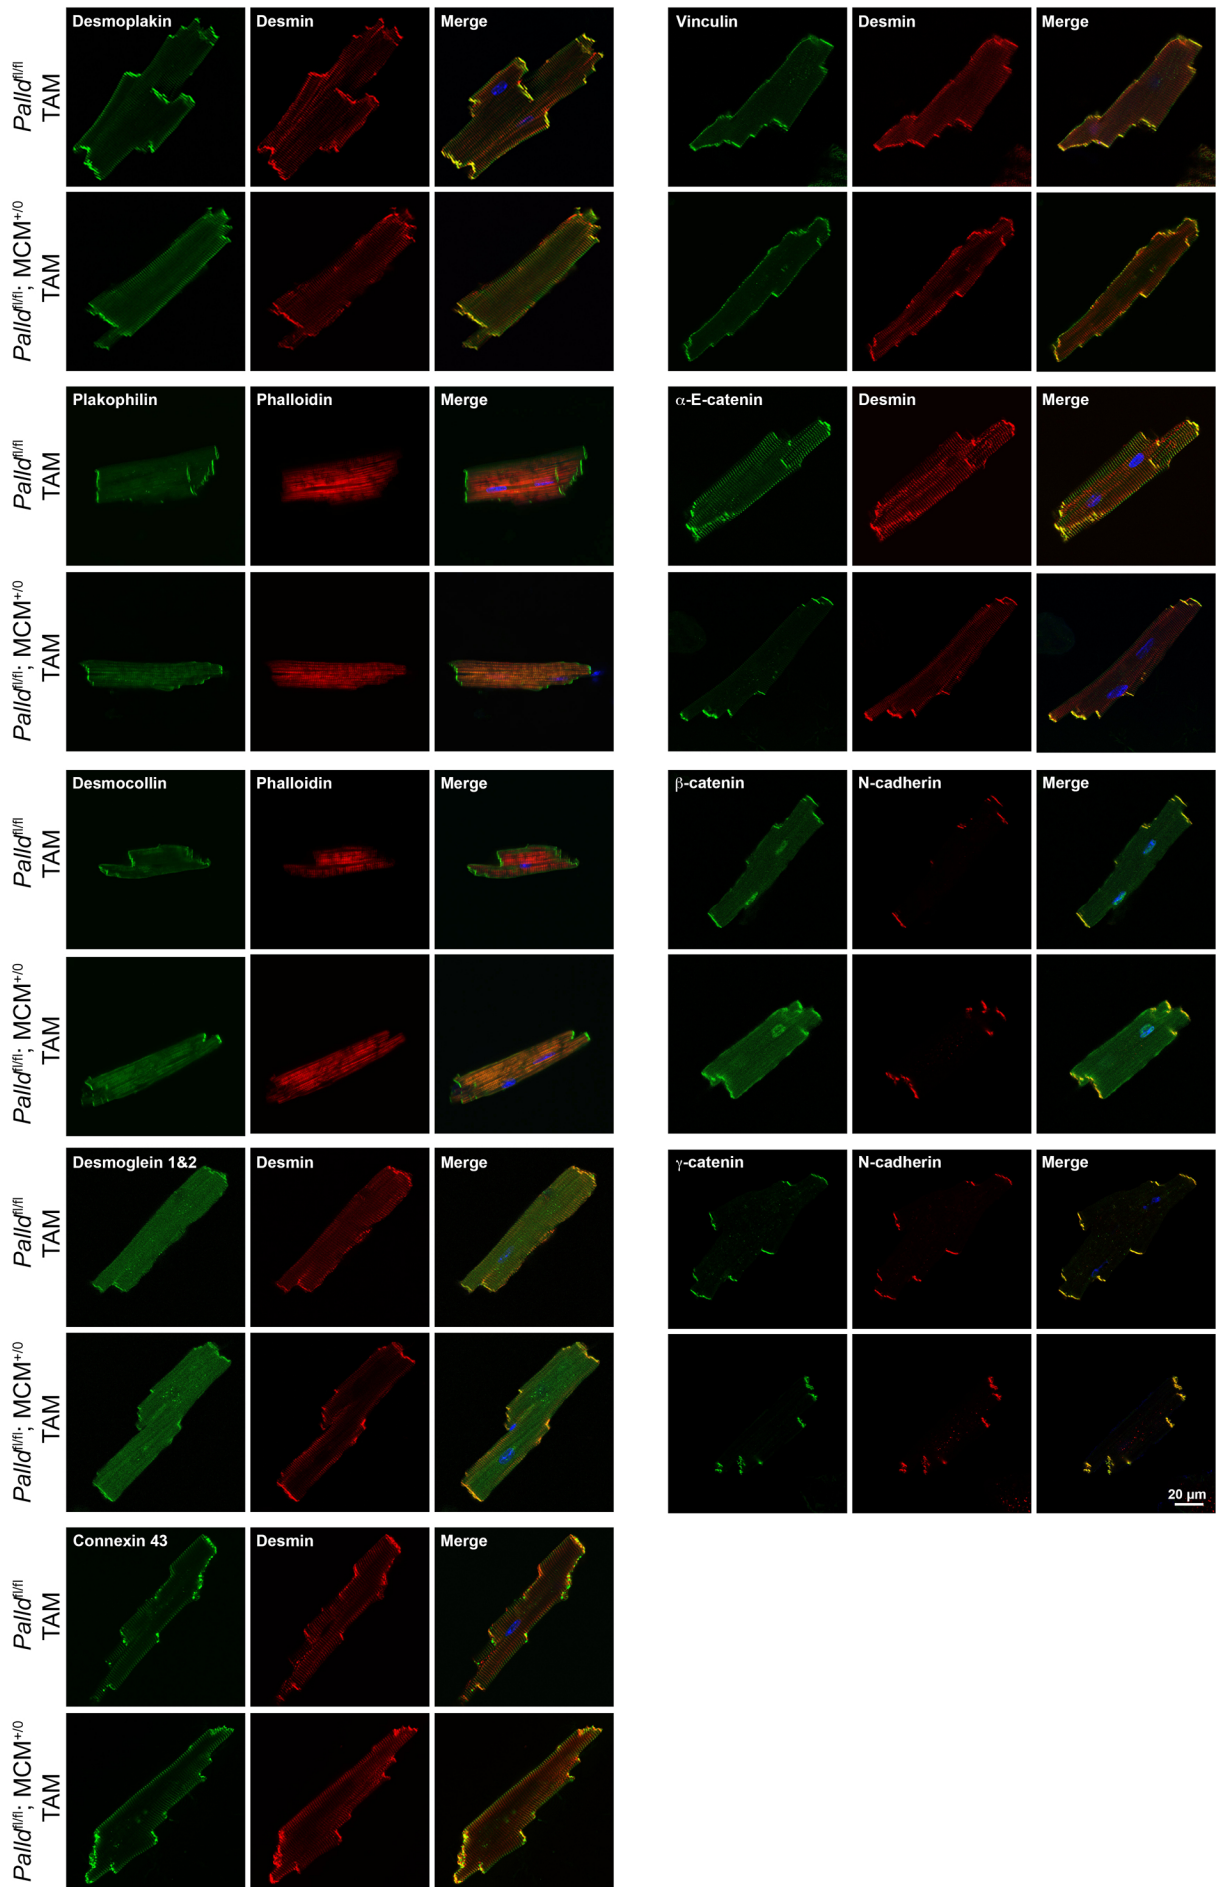

Figure 6-figure supplement 1

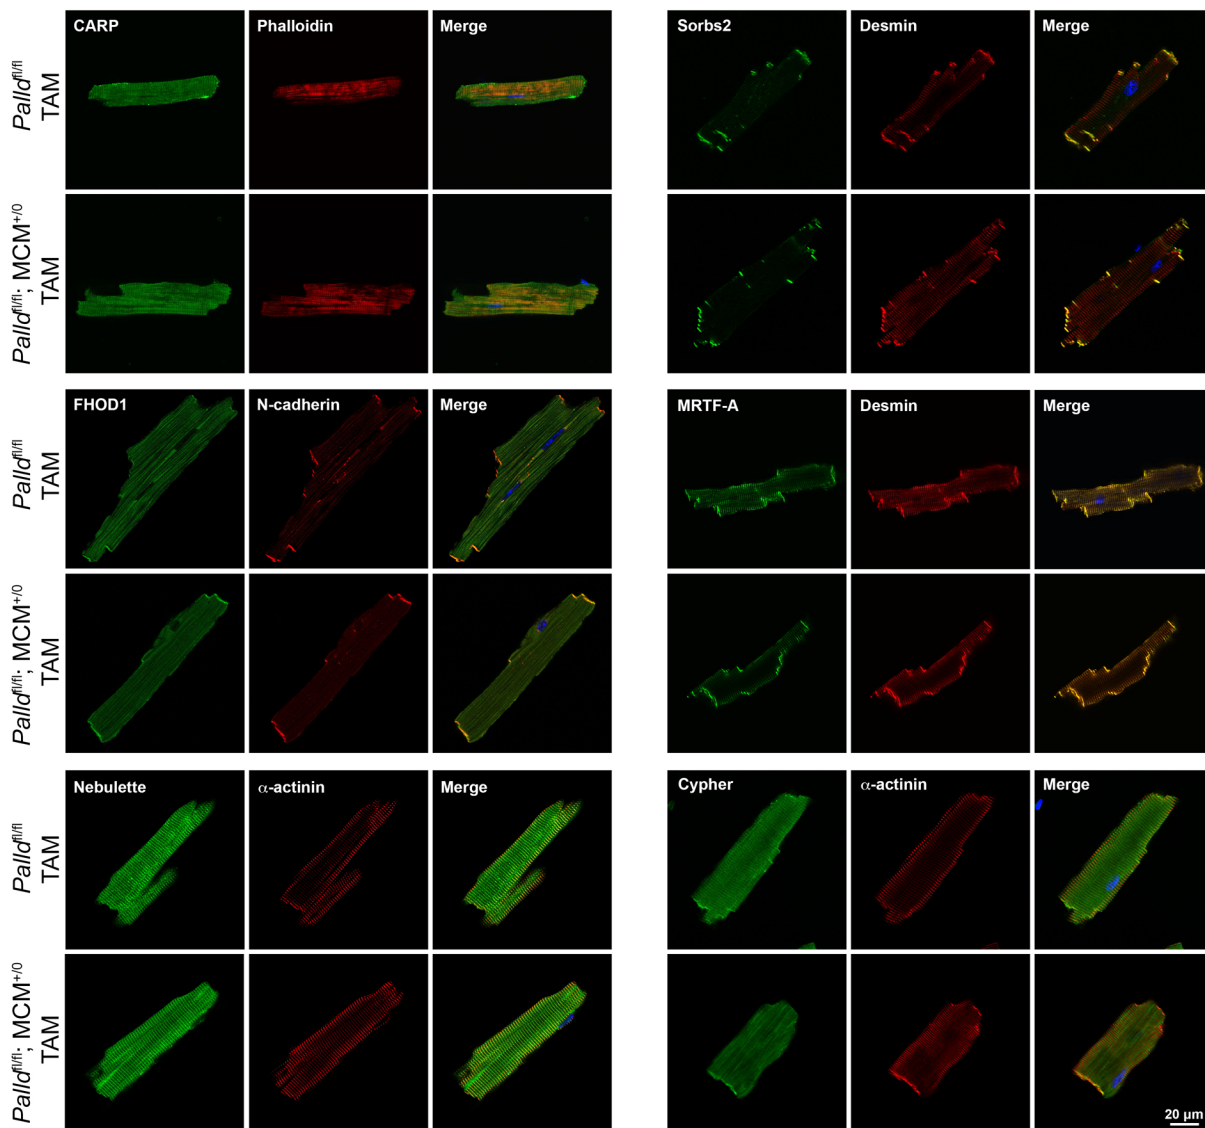

Figure 6-figure supplement 2

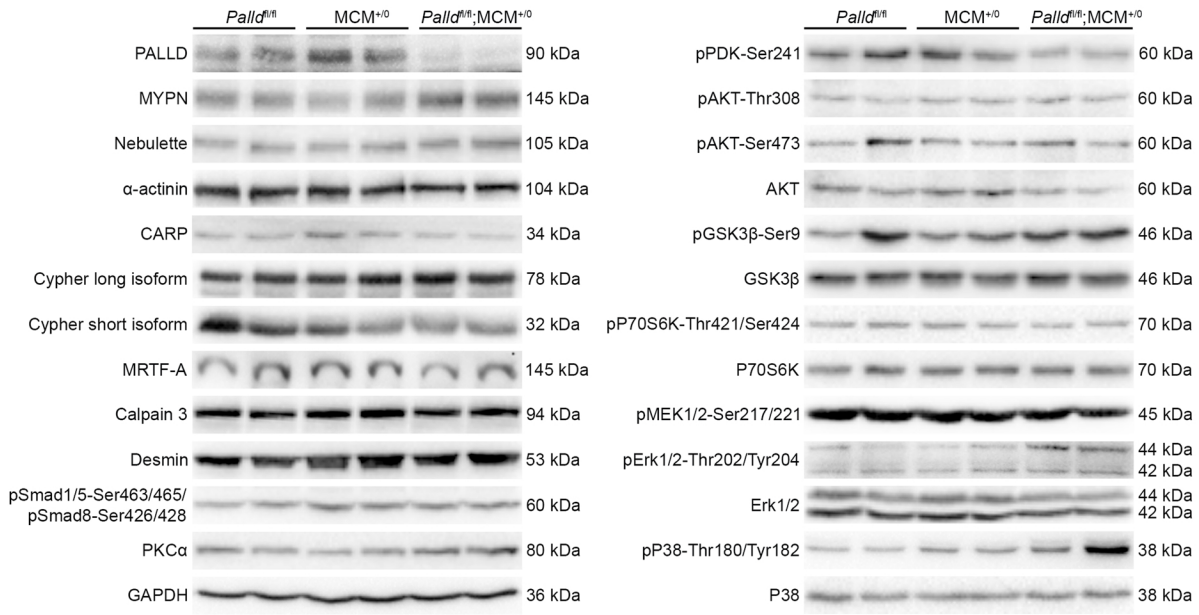

Figure 6-figure supplement 3

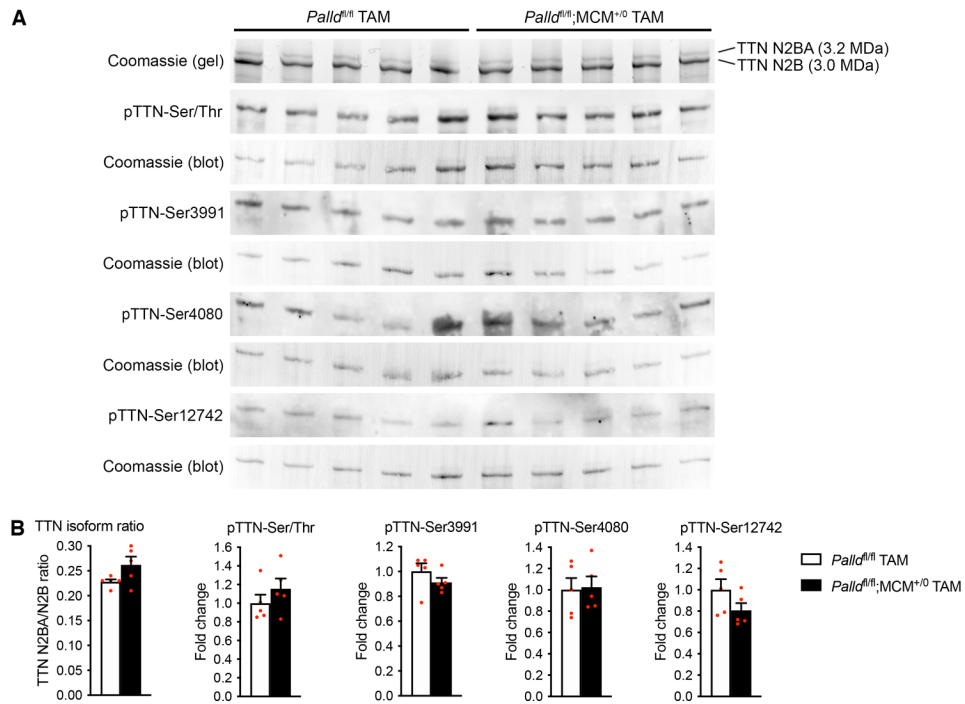

Figure 6-figure supplement 4

**Figure 6—figure supplement 5.** Patient characteristics.

| Number | Gender | Age (years) | Disease |
|--------|--------|-------------|---------|
| 1      | M      | 20-50       | Ctrl    |
| 2      | M      | 20-50       | Ctrl    |
| 3      | M      | 20-50       | Ctrl    |
| 4      | M      | 20-50       | Ctrl    |
| 5      | M      | 20-50       | Ctrl    |
| 6      | M      | 54          | DCM     |
| 7      | M      | 48          | DCM     |
| 8      | M      | 63          | DCM     |
| 9      | M      | 67          | DCM     |
| 10     | M      | 60          | DCM     |
| 11     | M      | 61          | DCM     |
| 12     | M      | 71          | DCM     |
| 13     | M      | 65          | DCM     |
| 14     | M      | 58          | ICM     |
| 15     | M      | 50          | ICM     |
| 16     | M      | 56          | ICM     |
| 17     | M      | 60          | ICM     |
| 18     | M      | 53          | ICM     |
| 19     | M      | 67          | ICM     |
| 20     | M      | 58          | ICM     |
| 21     | M      | 58          | ICM     |

M, male; Ctrl, healthy control; DCM, dilated cardiomyopathy; ICM, ischemic cardiomyopathy.



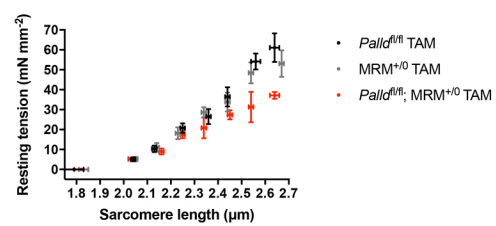

Table 1-figure supplement 1
